# Supplementary material for: Unique Features of Germline Variation in Five Egyptian Familial Breast Cancer Families Revealed by Exome Sequencing
Source: PLoS One. 2017 Jan 11;12(1):e0167581. doi: 10.1371/journal.pone.0167581 (PMC5226826; doi:10.1371/journal.pone.0167581)
Supplement: S3 Table — (XLSX) [file pone.0167581.s003.xlsx]

## Sheet: Egyptian-specific
S3 Table. Egyptian-specific normal variants
Chr.	Position	Ref.	Var.	Zygosity	Count	AllelFreq	Location	Gene	Type				Population frequency						dbSNP								Damage prediction											cosmic68	clinvar_20140929	OMIM Gene Id
										AA change	1000g2014sep_afr	1000g2014sep_amr	1000g2014sep_asn	1000g2014sep_eur	1000g2014sep_eas	1000g2014sep_sas	esp6500si_aa	esp6500si_ea		SIFT	PolyPhen 2 HDIV	PolyPhen 2 HVAR	LJB FATHMM	LJB GERP++	LJB PhyloP	LJB SiPhy	LJB MutationTaster	LJB MutationAssessor	LJB LRT	LR	caddgt20	SiPhy_29way_logOdds	phyloP46way_placental	phyloP100way_vertebrate	VEST3_score	CADD_raw	CADD_phred
chr1	17698730	C	T	het	1	0.0434783	UTR5	PADI6										0.000117	rs368985542
chr1	17698815	C	T	het	3	0.130435	exonic	PADI6	synonymous SNV	PADI6:NM_207421:exon1:c.75C>T:p.A25A	0.0023						0.000923		rs373701609
chr1	17721513	G	A	het	1	0.0434783	exonic	PADI6	synonymous SNV	PADI6:NM_207421:exon13:c.1404G>A:p.P468P																												ID=COSM117071;OCCURENCE=1(ovary)
chr1	17723552	C	T	het	1	0.0434783	splicing	PADI6
chr1	26664114	G	T	het	1	0.0434783	exonic	AIM1L	synonymous SNV	AIM1L:NM_001039775:exon9:c.3559C>A:p.R1187R		0.0014				0.0051		0.000581	rs143892451	0	0	0	0	-9.55			0.999	0	0	0.214		14.115	-1.432	-1.455	0	1.016	9.149
chr1	26670343	G	-	het	1	0.0434783	exonic	AIM1L	frameshift deletion	AIM1L:NM_001039775:exon2:c.2806delC:p.H936fs
chr1	26670656	C	A	het	2	0.0869565	exonic	AIM1L	nonsynonymous SNV	AIM1L:NM_001039775:exon2:c.2493G>T:p.E831D		0.0014		0.007					rs185540835
chr1	26671340	G	C	het	1	0.0434783	exonic	AIM1L	synonymous SNV	AIM1L:NM_001039775:exon2:c.1809C>G:p.P603P
chr1	26671344	C	G	het	1	0.0434783	exonic	AIM1L	nonsynonymous SNV	AIM1L:NM_001039775:exon2:c.1805G>C:p.G602A
chr1	26671471	G	A	het	1	0.0434783	exonic	AIM1L	nonsynonymous SNV	AIM1L:NM_001039775:exon2:c.1678C>T:p.P560S
chr1	26671690	A	G	het	2	0.0869565	exonic	AIM1L	nonsynonymous SNV	AIM1L:NM_001039775:exon2:c.1459T>C:p.S487P									rs112674559
chr1	26675043	AG	GA	het	1	0.0434783	intronic	AIM1L
chr1	55075435	G	A	het	1	0.0434783	exonic	FAM151A	nonsynonymous SNV	FAM151A:NM_176782:exon8:c.1264C>T:p.R422W						0.001				0.01	0.068	0.027	2.68	2.31			1	1.25	0.019	0.026		6.674	0.723	0.358	0.264	1.031	9.212	ID=COSM426478;OCCURENCE=1(breast)
chr1	55085648	C	T	het	1	0.0434783	exonic	FAM151A	nonsynonymous SNV	FAM151A:NM_176782:exon2:c.151G>A:p.D51N		0.0072		0.0099	0.003		0.001816	0.008605	rs17399297	0.33	0.238	0.041	2.75	4.48			1	0.405	0	0.016		16.082	2.341	6.245	0.221	1.719	11.71
chr1	144835531	G	A	het	5	0.217391	intronic	NBPF20,NBPF9											rs12032527
chr1	144835547	G	A	het	1	0.0434783	intronic	NBPF20,NBPF9											rs12032529
chr1	144835554	A	G	het	6	0.26087	intronic	NBPF20,NBPF9											rs56675018
chr1	144835565	G	C	het	10	0.434783	intronic	NBPF20,NBPF9											rs58864164
chr1	144835574	C	G	het	1	0.0434783	intronic	NBPF20,NBPF9											rs6684871
chr1	144835630	A	G	het	2	0.0869565	intronic	NBPF20,NBPF9											rs1610831
chr1	144835759	C	T	het	2	0.0869565	intronic	NBPF20,NBPF9											rs58482480
chr1	144835832	A	G	hom	8	0.347826	intronic	NBPF20,NBPF9											rs3209532
chr1	144835864	C	T	het	1	0.0434783	intronic	NBPF20,NBPF9
chr1	144851435	A	C	het	1	0.0434783	UTR3	PDE4DIP											rs141526684
chr1	144851460	C	T	het	2	0.0869565	UTR3	PDE4DIP											rs9536
chr1	144851467	T	A	het	13	0.565217	UTR3	PDE4DIP											rs13247
chr1	144851470	C	T	het	2	0.0869565	UTR3	PDE4DIP											rs1055538
chr1	144851484	A	G	het	8	0.347826	UTR3	PDE4DIP											rs8947
chr1	144851506	C	G	het	5	0.217391	UTR3	PDE4DIP											rs3733
chr1	144851543	T	A	het	5	0.217391	UTR3	PDE4DIP											rs3734
chr1	144851554	T	A	het	3	0.130435	UTR3	PDE4DIP											rs3736
chr1	144851563	A	G	het	1	0.0434783	UTR3	PDE4DIP											rs1055500
chr1	144851634	T	G	het	1	0.0434783	UTR3	PDE4DIP											rs1055464
chr1	144851848	G	A	het	17	0.73913	UTR3	PDE4DIP											rs1055360
chr1	144851903	G	A	het	16	0.695652	UTR3	PDE4DIP											rs1055339
chr1	144851969	C	T	het	2	0.0869565	UTR3	PDE4DIP				0.0014		0.002
chr1	144851999	A	C	het	16	0.695652	UTR3	PDE4DIP											rs1699761
chr1	144852055	T	C	het	1	0.0434783	UTR3	PDE4DIP
chr1	144852080	T	C	het	14	0.608696	UTR3	PDE4DIP											rs1619391
chr1	144852167	G	T	het	4	0.173913	UTR3	PDE4DIP											rs1055319
chr1	144852249	C	T	het	1	0.0434783	UTR3	PDE4DIP											rs1055317
chr1	144852315	C	T	het	5	0.217391	UTR3	PDE4DIP											rs141564171
chr1	144852390	C	T	het	3	0.130435	exonic	PDE4DIP	stopgain	PDE4DIP:NM_001198834:exon44:c.7053G>A:p.W2351X									rs2455986	1	0	0	0	3.48			1	0	0	0	15.1077	10.259	2.216	2.282	0	15.108	49			608117
chr1	144852450	G	A	het	5	0.217391	splicing	PDE4DIP											rs183737546
chr1	144852476	TG	CA	het	2	0.0869565	exonic	PDE4DIP	nonframeshift substitution	PDE4DIP:NM_014644:exon44:c.7022_7023TG,PDE4DIP:NM_001198832:exon46:c.6704_6705TG
chr1	144852509	AACAT	-	het	2	0.0869565	splicing	PDE4DIP
chr1	144852518	C	T	het	8	0.347826	splicing	PDE4DIP
chr1	144854581	T	C	het	14	0.608696	exonic	PDE4DIP	nonsynonymous SNV	PDE4DIP:NM_001198834:exon42:c.6889A>G:p.T2297A,PDE4DIP:NM_014644:exon42:c.6889A>G:p.T2297A,PDE4DIP:NM_001198832:exon44:c.6571A>G:p.T2191A									rs78371650	0.74	0	0	4.99	-0.888			1	-1.935	0	0		3.881	-0.092	0.149	0.042	-2.277	0.004			608117
chr1	144854597	TC	CT	het	7	0.304348	exonic	PDE4DIP	nonframeshift substitution	PDE4DIP:NM_001198834:exon42:c.6872_6873AG,PDE4DIP:NM_014644:exon42:c.6872_6873AG,PDE4DIP:NM_001198832:exon44:c.6554_6555AG
chr1	144855812	T	C	het	8	0.347826	exonic	PDE4DIP	synonymous SNV	PDE4DIP:NM_001198834:exon41:c.6741A>G:p.S2247S,PDE4DIP:NM_014644:exon41:c.6741A>G:p.S2247S,PDE4DIP:NM_001198832:exon43:c.6423A>G:p.S2141S									rs1699754
chr1	144857705	G	A	het	2	0.0869565	exonic	PDE4DIP	nonsynonymous SNV	PDE4DIP:NM_001198834:exon39:c.6349C>T:p.R2117W,PDE4DIP:NM_014644:exon39:c.6349C>T:p.R2117W,PDE4DIP:NM_001198832:exon41:c.6031C>T:p.R2011W							0.000681	0.000698	rs146619065	0	0.999	0.684	4.59	3.98			1	2.28	0	0.01	3.94495	11.261	1.198	3.42	0.506	3.945	20.2			608117
chr1	144858200	A	C	het	6	0.26087	intronic	NBPF20,NBPF9,PDE4DIP											rs1698575
chr1	144858348	G	C	het	2	0.0869565	intronic	NBPF20,NBPF9,PDE4DIP
chr1	144858510	G	A	het	18	0.782609	intronic	NBPF20,NBPF9,PDE4DIP											rs1778131
chr1	144858537	G	T	het	18	0.782609	intronic	NBPF20,NBPF9,PDE4DIP											rs1699823
chr1	144858724	A	C	het	2	0.0869565	intronic	NBPF20,NBPF9,PDE4DIP											rs660406
chr1	144859745	C	T	het	1	0.0434783	splicing	PDE4DIP									0.000908	0.000698	rs200576687
chr1	144864161	A	G	het	1	0.0434783	exonic	PDE4DIP	synonymous SNV	PDE4DIP:NM_001198834:exon36:c.5934T>C:p.R1978R,PDE4DIP:NM_014644:exon36:c.5934T>C:p.R1978R,PDE4DIP:NM_001198832:exon38:c.5616T>C:p.R1872R										0	0	0	0	-8.86			1	0	0	0.041		1.564	-1.711	-1.002	0	-0.411	2.079			608117
chr1	144865850	G	T	het	17	0.73913	exonic	PDE4DIP	nonsynonymous SNV	PDE4DIP:NM_001198834:exon35:c.5730C>A:p.D1910E,PDE4DIP:NM_014644:exon35:c.5730C>A:p.D1910E,PDE4DIP:NM_001198832:exon37:c.5412C>A:p.D1804E									rs1613780	1	0	0	5.35	3.3			1	-2.045	0	0.007		4.602	0.078	0.393	0.209	-0.992	0.272			608117
chr1	144866643	G	A	het	16	0.695652	exonic	PDE4DIP	nonsynonymous SNV	PDE4DIP:NM_001198834:exon34:c.5599C>T:p.R1867C,PDE4DIP:NM_014644:exon34:c.5599C>T:p.R1867C,PDE4DIP:NM_001198832:exon36:c.5281C>T:p.R1761C									rs1620560	0.01	1	0.995	3.99	2.24			1	2.365	0	0.019		6.287	0.33	1.088	0.513	2.135	13.1			608117
chr1	144866662	T	C	het	18	0.782609	exonic	PDE4DIP	synonymous SNV	PDE4DIP:NM_001198834:exon34:c.5580A>G:p.E1860E,PDE4DIP:NM_014644:exon34:c.5580A>G:p.E1860E,PDE4DIP:NM_001198832:exon36:c.5262A>G:p.E1754E									rs1064044	0	0	0	0	2.05			0	0	0	0.055		6.847	0.354	0.268	0	1.473	10.87			608117
chr1	144871738	C	A	het	13	0.565217	exonic	PDE4DIP	nonsynonymous SNV	PDE4DIP:NM_001198834:exon32:c.5224G>T:p.A1742S,PDE4DIP:NM_014644:exon32:c.5224G>T:p.A1742S									rs1698605	0.48	0.997	0.985	4.7	5.97			1	1.995	0	0.015	5.07137	17.918	2.834	6.65	0.179	5.071	31			608117
chr1	144871755	A	T	het	9	0.391304	exonic	PDE4DIP	nonsynonymous SNV	PDE4DIP:NM_001198834:exon32:c.5207T>A:p.V1736E,PDE4DIP:NM_014644:exon32:c.5207T>A:p.V1736E									rs1778159	0.32	0.361	0.069	4.81	0.597			1	1.59	0	0.002		7.646	0.127	0.238	0.271	2.221	13.38			608117
chr1	144871782	A	G	het	8	0.347826	exonic	PDE4DIP	nonsynonymous SNV	PDE4DIP:NM_001198834:exon32:c.5180T>C:p.L1727P,PDE4DIP:NM_014644:exon32:c.5180T>C:p.L1727P									rs1778158	1	0	0	4.86	5.97			1	-1.935	0	0.001		13.28	1.549	3.094	0.116	0.261	5.413			608117
chr1	144871889	A	C	het	14	0.608696	splicing	PDE4DIP											rs1698606
chr1	144873903	G	T	het	1	0.0434783	exonic	PDE4DIP	nonsynonymous SNV	PDE4DIP:NM_001198834:exon31:c.5054C>A:p.P1685H,PDE4DIP:NM_014644:exon31:c.5054C>A:p.P1685H,PDE4DIP:NM_001198832:exon34:c.4922C>A:p.P1641H										0.02	1	0.998	4.63	3.25			1	1.43	0	0.011		10.955	0.848	2.401	0.549	3.232	16.83			608117
chr1	144873958	C	-	het	1	0.0434783	exonic	PDE4DIP	frameshift deletion	PDE4DIP:NM_001198834:exon31:c.4999delG:p.A1667fs,PDE4DIP:NM_014644:exon31:c.4999delG:p.A1667fs,PDE4DIP:NM_001198832:exon34:c.4867delG:p.A1623fs
chr1	144873960	C	T	het	1	0.0434783	exonic	PDE4DIP	nonsynonymous SNV	PDE4DIP:NM_001198834:exon31:c.4997G>A:p.G1666E,PDE4DIP:NM_014644:exon31:c.4997G>A:p.G1666E,PDE4DIP:NM_001198832:exon34:c.4865G>A:p.G1622E		0.0014					0.000227		rs147670655	0.32	0.041	0.027	4.85	4.37			1	0.805	0	0.002		9.726	1.456	0.974	0.338	2.353	13.83			608117
chr1	144874038	T	C	het	15	0.652174	splicing	PDE4DIP											rs1419160												4.60276
chr1	144874760	T	C	het	18	0.782609	exonic	PDE4DIP	synonymous SNV	PDE4DIP:NM_001198834:exon30:c.4848A>G:p.E1616E,PDE4DIP:NM_014644:exon30:c.4848A>G:p.E1616E,PDE4DIP:NM_001198832:exon33:c.4716A>G:p.E1572E									rs1610774
chr1	144874950	G	A	het	18	0.782609	intronic	NBPF20,NBPF9,PDE4DIP											rs1747957
chr1	144877176	C	T	het	14	0.608696	exonic	PDE4DIP	nonsynonymous SNV	PDE4DIP:NM_001198834:exon28:c.4511G>A:p.R1504Q,PDE4DIP:NM_014644:exon28:c.4511G>A:p.R1504Q,PDE4DIP:NM_001198832:exon31:c.4379G>A:p.R1460Q									rs2762875	1	0	0	5.54	5.18			1	-2.325	0	0		9.32	0.994	5.444	0.307	0.264	5.425			608117
chr1	144877366	A	G	het	16	0.695652	intronic	NBPF20,NBPF9,PDE4DIP											rs1807092
chr1	144877390	G	A	het	17	0.73913	intronic	NBPF20,NBPF9,PDE4DIP											rs1807093
chr1	144877938	A	G	het	13	0.565217	intronic	NBPF20,NBPF9,PDE4DIP											rs1807422
chr1	144878001	C	T	het	14	0.608696	intronic	NBPF20,NBPF9,PDE4DIP											rs71664007
chr1	144878019	C	T	het	13	0.565217	intronic	NBPF20,NBPF9,PDE4DIP											rs71664008
chr1	144878041	TT	CA	het	8	0.347826	intronic	NBPF20,NBPF9,PDE4DIP
chr1	144878048	G	A	het	16	0.695652	intronic	NBPF20,NBPF9,PDE4DIP											rs80099129
chr1	144878111	C	A	het	17	0.73913	intronic	NBPF20,NBPF9,PDE4DIP											rs71664009
chr1	144879310	C	A	het	2	0.0869565	exonic	PDE4DIP	synonymous SNV	PDE4DIP:NM_001198834:exon27:c.4140G>T:p.R1380R,PDE4DIP:NM_014644:exon27:c.4140G>T:p.R1380R,PDE4DIP:NM_001198832:exon30:c.4008G>T:p.R1336R							0.008171		rs142900552
chr1	144879375	T	C	het	15	0.652174	exonic	PDE4DIP	nonsynonymous SNV	PDE4DIP:NM_001198834:exon27:c.4075A>G:p.K1359E,PDE4DIP:NM_014644:exon27:c.4075A>G:p.K1359E,PDE4DIP:NM_001198832:exon30:c.3943A>G:p.K1315E									rs1747958	0.92	0.229	0.053	4.9	-0.444			0.788	0.695	0	0.001		7.421	0.068	0.385	0.065	0.734	7.897			608117
chr1	144879542	A	G	het	1	0.0434783	exonic	PDE4DIP	nonsynonymous SNV	PDE4DIP:NM_001198834:exon27:c.3908T>C:p.L1303P,PDE4DIP:NM_014644:exon27:c.3908T>C:p.L1303P,PDE4DIP:NM_001198832:exon30:c.3776T>C:p.L1259P										0.1	0.005	0.009	4.67	2.15			1	1.7	0	0.003		8.185	0.114	2.118	0.323	1.654	11.49	ID=COSM225964;OCCURENCE=1(NS),1(prostate)		608117
chr1	144881547	G	A	het	2	0.0869565	exonic	PDE4DIP	nonsynonymous SNV	PDE4DIP:NM_001198834:exon25:c.3649C>T:p.R1217C,PDE4DIP:NM_014644:exon25:c.3649C>T:p.R1217C,PDE4DIP:NM_001198832:exon28:c.3517C>T:p.R1173C							0.001816	0.001047	rs138083036	0	1	0.997	4.7	6.05			1	1.875	0	0.019	4.22977	18.095	2.878	2.167	0.565	4.23	22			608117
chr1	144882472	C	T	het	1	0.0434783	exonic	PDE4DIP	nonsynonymous SNV	PDE4DIP:NM_001198834:exon24:c.3547G>A:p.A1183T,PDE4DIP:NM_014644:exon24:c.3547G>A:p.A1183T	0.0015						0.000454		rs140312738	0.61	0	0.001	4.78	-0.198			1	0.41	0	0.012		1.429	0.116	-1.202	0.2	0.062	4.338			608117
chr1	144882581	A	G	het	16	0.695652	exonic	PDE4DIP	synonymous SNV	PDE4DIP:NM_001198834:exon24:c.3438T>C:p.I1146I,PDE4DIP:NM_014644:exon24:c.3438T>C:p.I1146I									rs1699836	0	0	0	0	-11.6			1	0	0	0		7.706	-2.229	-4.503	0	0.775	8.095			608117
chr1	144882742	G	T	het	1	0.0434783	exonic	PDE4DIP	nonsynonymous SNV	PDE4DIP:NM_001198834:exon24:c.3277C>A:p.L1093M,PDE4DIP:NM_014644:exon24:c.3277C>A:p.L1093M								0.000116	rs376801661	0.13	0.8	0.278	4.77	1.91			1	1.155	0	0.002		9.864	0.42	0.69	0.158	1.449	10.79			608117
chr1	144882823	C	T	het	14	0.608696	exonic	PDE4DIP	nonsynonymous SNV	PDE4DIP:NM_001198834:exon24:c.3196G>A:p.A1066T,PDE4DIP:NM_014644:exon24:c.3196G>A:p.A1066T,PDE4DIP:NM_001198832:exon27:c.3394G>A:p.A1132T									rs1698647	0.58	0.998	0.995	4.69	5.76			1	0.805	0	0.009	5.06045	17.451	2.736	3.31	0.429	5.06	31			608117
chr1	144886092	C	T	het	15	0.652174	splicing	PDE4DIP											rs1343472
chr1	144886197	A	T	het	16	0.695652	exonic	PDE4DIP	nonsynonymous SNV	PDE4DIP:NM_001198834:exon23:c.3037T>A:p.F1013I,PDE4DIP:NM_014644:exon23:c.3037T>A:p.F1013I,PDE4DIP:NM_001198832:exon26:c.3235T>A:p.F1079I									rs1698624	0.55	0	0	5.01	-2.45			0.972	-0.345	0	0.001		2.677	-0.81	-0.328	0.29	-1.049	0.196			608117
chr1	144909858	A	-	het	1	0.0434783	splicing	PDE4DIP
chr1	144912233	C	T	het	15	0.652174	exonic	PDE4DIP	nonsynonymous SNV	PDE4DIP:NM_001002811:exon11:c.2531G>A:p.R844H,PDE4DIP:NM_001002812:exon15:c.2042G>A:p.R681H,PDE4DIP:NM_001198834:exon15:c.2042G>A:p.R681H,PDE4DIP:NM_014644:exon15:c.2042G>A:p.R681H,PDE4DIP:NM_001198832:exon18:c.2240G>A:p.R747H									rs1629011	0.12	1	0.998	4.35	4.62			1	0.975	0	0.052		12.264	0.743	2.224	0.571	1.457	10.82			608117
chr1	144915561	G	A	het	17	0.73913	exonic	PDE4DIP	stopgain	PDE4DIP:NM_001002811:exon10:c.2353C>T:p.R785X,PDE4DIP:NM_001002812:exon14:c.1864C>T:p.R622X,PDE4DIP:NM_001198834:exon14:c.1864C>T:p.R622X,PDE4DIP:NM_014644:exon14:c.1864C>T:p.R622X,PDE4DIP:NM_001198832:exon17:c.2062C>T:p.R688X									rs1778111	1	0	0	0	3.29			1	0	0	0	8.12284	4.43	1.327	2.184	0	8.123	40			608117
chr1	144915592	C	T	het	2	0.0869565	exonic	PDE4DIP	synonymous SNV	PDE4DIP:NM_001002811:exon10:c.2322G>A:p.E774E,PDE4DIP:NM_001002812:exon14:c.1833G>A:p.E611E,PDE4DIP:NM_001198834:exon14:c.1833G>A:p.E611E,PDE4DIP:NM_014644:exon14:c.1833G>A:p.E611E,PDE4DIP:NM_001198832:exon17:c.2031G>A:p.E677E
chr1	144917546	A	G	het	13	0.565217	exonic	PDE4DIP	synonymous SNV	PDE4DIP:NM_001002811:exon8:c.2047T>C:p.L683L,PDE4DIP:NM_001002812:exon12:c.1558T>C:p.L520L,PDE4DIP:NM_001198834:exon12:c.1558T>C:p.L520L,PDE4DIP:NM_014644:exon12:c.1558T>C:p.L520L,PDE4DIP:NM_001198832:exon15:c.1756T>C:p.L586L									rs1698682
chr1	144917557	C	T	het	1	0.0434783	exonic	PDE4DIP	nonsynonymous SNV	PDE4DIP:NM_001002811:exon8:c.2036G>A:p.R679Q,PDE4DIP:NM_001002812:exon12:c.1547G>A:p.R516Q,PDE4DIP:NM_001198834:exon12:c.1547G>A:p.R516Q,PDE4DIP:NM_014644:exon12:c.1547G>A:p.R516Q,PDE4DIP:NM_001198832:exon15:c.1745G>A:p.R582Q										0.39	1	0.973	4.71	6.04			1	1.87	0	0.047	3.94067	11.406	2.89	2.887	0.685	3.941	20.1	ID=COSM1172020,COSM1172019,COSM1172021;OCCURENCE=1(oesophagus)		608117
chr1	144917841	T	C	het	11	0.478261	exonic	PDE4DIP	nonsynonymous SNV	PDE4DIP:NM_001002811:exon7:c.1934A>G:p.H645R,PDE4DIP:NM_001002812:exon11:c.1445A>G:p.H482R,PDE4DIP:NM_001198834:exon11:c.1445A>G:p.H482R,PDE4DIP:NM_014644:exon11:c.1445A>G:p.H482R,PDE4DIP:NM_001198832:exon14:c.1643A>G:p.H548R									rs1698681	0.64	0.053	0.058	4.99	4.59			1	-0.55	0	0.041		10.02	2.215	2.822	0.227	1.128	9.599			608117
chr1	144918957	T	A	het	14	0.608696	exonic	PDE4DIP	nonsynonymous SNV	PDE4DIP:NM_001002811:exon6:c.1718A>T:p.E573V,PDE4DIP:NM_001002812:exon10:c.1229A>T:p.E410V,PDE4DIP:NM_001198834:exon10:c.1229A>T:p.E410V,PDE4DIP:NM_014644:exon10:c.1229A>T:p.E410V,PDE4DIP:NM_001198832:exon13:c.1427A>T:p.E476V									rs1061308	0	1	0.998	4.41	5.64			1	1.935	0	0.075	4.48208	13.796	2.144	6.31	0.591	4.482	24			608117
chr1	144922171	C	T	het	14	0.608696	splicing	PDE4DIP											rs1343470
chr1	144922583	G	A	het	13	0.565217	exonic	PDE4DIP	nonsynonymous SNV	PDE4DIP:NM_001002811:exon3:c.1313C>T:p.S438L,PDE4DIP:NM_001002812:exon7:c.824C>T:p.S275L,PDE4DIP:NM_001198834:exon7:c.824C>T:p.S275L,PDE4DIP:NM_014644:exon7:c.824C>T:p.S275L,PDE4DIP:NM_001198832:exon10:c.1022C>T:p.S341L									rs1359300	0.01	0.723	0.172	4.82	3.2			1	0.69	0	0.009		4.776	0.896	2.152	0.134	2.115	13.03			608117
chr1	144930571	C	A	het	13	0.565217	splicing	PDE4DIP											rs2762866
chr1	144930940	T	C	het	16	0.695652	exonic	PDE4DIP	nonsynonymous SNV	PDE4DIP:NM_001002811:exon1:c.769A>G:p.K257E									rs2147326	1	0.763	0.311	2.72	5.53			1	1.7	0	0.015		13.604	2.1	3.061	0.327	0.892	8.625			608117
chr1	144931330	C	T	het	19	0.826087	exonic	PDE4DIP	nonsynonymous SNV	PDE4DIP:NM_001002811:exon1:c.379G>A:p.A127T									rs2762745	0.02	1	0.988	2.56	5.3			1	1.87	0	0.064	4.03149	16.437	2.467	6.056	0.303	4.031	20.7			608117
chr1	144931392	G	A	het	17	0.73913	exonic	PDE4DIP	nonsynonymous SNV	PDE4DIP:NM_001002811:exon1:c.317C>T:p.A106V									rs2798893	0.32	0.036	0.01	2.67	4.35			0.994	0.14	0	0.008		12.594	1.154	1.217	0.039	0.239	5.292			608117
chr1	144931423	T	C	het	1	0.0434783	exonic	PDE4DIP	nonsynonymous SNV	PDE4DIP:NM_001002811:exon1:c.286A>G:p.M96V										0.02	0.27	0.128	2.6	4.1			1	1.5	0	0.017		9.165	1.996	1.59	0.328	2.321	13.72			608117
chr1	144952242	G	C	het	1	0.0434783	exonic	PDE4DIP	synonymous SNV	PDE4DIP:NM_001002810:exon4:c.477C>G:p.V159V,PDE4DIP:NM_001002812:exon4:c.477C>G:p.V159V,PDE4DIP:NM_001198834:exon4:c.477C>G:p.V159V,PDE4DIP:NM_014644:exon4:c.477C>G:p.V159V,PDE4DIP:NM_001195260:exon5:c.381C>G:p.V127V,PDE4DIP:NM_001195261:exon5:c.486C>G:p.V162V,PDE4DIP:NM_001198832:exon7:c.675C>G:p.V225V,PDE4DIP:NM_022359:exon7:c.888C>G:p.V296V
chr1	144989914	G	C	het	6	0.26087	intronic	NBPF20,NBPF9,PDE4DIP											rs3845314
chr1	144989929	A	G	het	18	0.782609	intronic	NBPF20,NBPF9,PDE4DIP											rs1620351
chr1	144989994	ATTT	-	het	1	0.0434783	intronic	NBPF20,NBPF9,PDE4DIP
chr1	144989995	TTT	-	het	1	0.0434783	intronic	NBPF20,NBPF9,PDE4DIP
chr1	144990002	C	T	het	10	0.434783	intronic	NBPF20,NBPF9,PDE4DIP											rs2442638
chr1	144994658	C	A	het	17	0.73913	exonic	PDE4DIP	nonsynonymous SNV	PDE4DIP:NM_001002810:exon1:c.74G>T:p.R25L,PDE4DIP:NM_001002812:exon1:c.74G>T:p.R25L,PDE4DIP:NM_001198834:exon1:c.74G>T:p.R25L,PDE4DIP:NM_014644:exon1:c.74G>T:p.R25L,PDE4DIP:NM_001195261:exon2:c.83G>T:p.R28L,PDE4DIP:NM_001198832:exon4:c.272G>T:p.R91L,PDE4DIP:NM_022359:exon4:c.485G>T:p.R162L									rs1664022	0	1	1	1.47	5.78			1	2.945	0	0.209	5.71962	17.5	2.731	7.708	0.997	5.72	36			608117
chr1	144994948	T	C	het	1	0.0434783	splicing	PDE4DIP
chr1	145018480	A	G	het	8	0.347826	intronic	NBPF20,NBPF9,PDE4DIP											rs1778697
chr1	145018530	G	C	het	1	0.0434783	intronic	NBPF20,NBPF9,PDE4DIP
chr1	145018565	A	G	het	1	0.0434783	intronic	NBPF20,NBPF9,PDE4DIP											rs598188
chr1	145018581	G	C	het	18	0.782609	intronic	NBPF20,NBPF9,PDE4DIP											rs1663921
chr1	145018788	T	C	het	19	0.826087	intronic	NBPF20,NBPF9,PDE4DIP											rs1052063
chr1	145018806	G	A	het	6	0.26087	intronic	NBPF20,NBPF9,PDE4DIP											rs12120415
chr1	145018882	C	T	het	7	0.304348	intronic	NBPF20,NBPF9,PDE4DIP											rs2596286
chr1	145018958	C	-	het	1	0.0434783	intronic	NBPF20,NBPF9,PDE4DIP
chr1	145021183	C	A	het	4	0.173913	splicing	PDE4DIP									0.006582	0.003721	rs56185836
chr1	145039594	T	C	het	1	0.0434783	exonic;splicing	PDE4DIP;PDE4DIP	nonsynonymous SNV	PDE4DIP:NM_001198832:exon1:c.16A>G:p.T6A									rs111958438	0.14	0	0.001	4.7	2.11			1	0	0	0.02		4.753	0.262	0.722	0.119	1.56	11.17	ID=COSM1333549;OCCURENCE=1(large_intestine)
chr1	145044740	A	G	het	1	0.0434783	intronic	NBPF20,NBPF9,PDE4DIP				0.0029		0.001	0.001	0.002
chr1	145075683	C	T	het	17	0.73913	exonic	PDE4DIP	stopgain	PDE4DIP:NM_022359:exon1:c.180G>A:p.W60X									rs2762779	1	0	0	0	3.72			1	0	0	0	4.41861	11.187	2.068	2.191	0	4.419	23.5	ID=COSM423677;OCCURENCE=1(breast)		608117
chr1	145075854	G	C	het	19	0.826087	exonic	PDE4DIP	synonymous SNV	PDE4DIP:NM_022359:exon1:c.9C>G:p.G3G									rs1663853
chr1	145076161	C	G	het	3	0.130435	UTR5	PDE4DIP											rs6656415
chr1	145289804	T	G	het	19	0.826087	ncRNA_exonic	NBPF25P											rs2746752
chr1	145289875	T	C	het	13	0.565217	ncRNA_exonic	NBPF25P											rs73004611
chr1	145289882	A	T	het	1	0.0434783	ncRNA_exonic	NBPF25P
chr1	145289908	C	T	het	10	0.434783	ncRNA_splicing	NBPF25P											rs79814489
chr1	145293274	T	G	het	1	0.0434783	ncRNA_intronic	NBPF25P											rs4525095
chr1	145293425	C	A	het	2	0.0869565	exonic	NBPF10	nonsynonymous SNV	NBPF10:NM_001039703:exon1:c.20C>A:p.P7H,NBPF10:NM_001302371:exon1:c.20C>A:p.P7H									rs7366490	0	1	0.987	3.55	-1.06			1	0.975	0	0.011		5.887	-0.356	-1.074	0.093	0.9	8.66			614000
chr1	145293428	G	C	het	2	0.0869565	exonic	NBPF10	nonsynonymous SNV	NBPF10:NM_001039703:exon1:c.23G>C:p.W8S,NBPF10:NM_001302371:exon1:c.23G>C:p.W8S									rs199928078	0.18	0	0	4.2	-2.42			1	0.755	0	0.002		0.566	-2.129	-1.838	0.159	-0.686	1.018			614000
chr1	145293469	G	C	het	1	0.0434783	exonic	NBPF10	nonsynonymous SNV	NBPF10:NM_001039703:exon1:c.64G>C:p.E22Q,NBPF10:NM_001302371:exon1:c.64G>C:p.E22Q									rs6671324	0.74	0.881	0.438	4.02	-1.37			1	0.785	0	0.003		6.662	-0.414	-1.862	0.091	-2.491	0.003			614000
chr1	145293490	G	C	het	2	0.0869565	exonic	NBPF10	nonsynonymous SNV	NBPF10:NM_001039703:exon1:c.85G>C:p.A29P,NBPF10:NM_001302371:exon1:c.85G>C:p.A29P									rs6671335	0.07	0.993	0.791	3.7	1.06			1	2.485	0	0.016		5.511	0.869	0.081	0.236	1.803	11.99			614000
chr1	145293498	G	C	het	3	0.130435	exonic	NBPF10	nonsynonymous SNV	NBPF10:NM_001039703:exon1:c.93G>C:p.K31N,NBPF10:NM_001302371:exon1:c.93G>C:p.K31N									rs4409714	0.71	0	0.001	4.13	0.073			1	-0.235	0	0.001		5.082	0.019	-1.149	0.028	-1.458	0.019			614000
chr1	145293510	C	G	het	4	0.173913	exonic	NBPF10	nonsynonymous SNV	NBPF10:NM_001039703:exon1:c.105C>G:p.F35L,NBPF10:NM_001302371:exon1:c.105C>G:p.F35L									rs4356110	0.12	0.985	0.831	3.85	-2.12			1	2.71	0	0.011		1.804	-1.056	-0.517	0.164	0.826	8.33			614000
chr1	145293515	A	G	het	6	0.26087	exonic	NBPF10	nonsynonymous SNV	NBPF10:NM_001039703:exon1:c.110A>G:p.N37S,NBPF10:NM_001302371:exon1:c.110A>G:p.N37S									rs12565078	0.64	0.001	0.006	4.05	-0.231			1	1.445	0	0.003		3.166	-0.082	0.914	0.037	-0.787	0.712			614000
chr1	145299838	G	A	het	1	0.0434783	exonic	NBPF10	nonsynonymous SNV	NBPF10:NM_001039703:exon6:c.887G>A:p.R296H,NBPF10:NM_001302371:exon6:c.887G>A:p.R296H									rs200473325	0.26	0.986	0.715	4.04	-2.1			1	0	0	0.006		5.861	-1.371	-1.156	0.025	-0.286	2.633	ID=COSM414115,COSM414116;OCCURENCE=1(breast),1(haematopoietic_and_lymphoid_tissue),1(urinary_tract),2(endometrium)		614000
chr1	145311083	A	C	het	10	0.434783	splicing	NBPF10											rs4649871
chr1	145311110	G	C	het	6	0.26087	exonic;splicing	NBPF10;NBPF10,NBPF25P	synonymous SNV	NBPF10:NM_001039703:exon13:c.1809G>C:p.R603R,NBPF10:NM_001302371:exon13:c.1809G>C:p.R603R									rs74472253	0.95	0.414	0.04	0	0.429			1	0	0	0.008		0	0.472	-0.577	0	-0.833	0.591
chr1	145367014	G	A	het	2	0.0869565	ncRNA_intronic	NBPF25P											rs3010127
chr1	145368461	A	C	het	6	0.26087	exonic	NBPF9	unknown	UNKNOWN									rs12128680	0.02	0	0.004	2.94	-1.11			1	2.65	0	0.013		2.705	-0.323	0.155	0.14	0.393	6.133			613999
chr1	145368837	C	-	het	1	0.0434783	ncRNA_exonic	NBPF25P
chr1	145368871	A	G	hom	4	0.173913	ncRNA_exonic	NBPF25P											rs7416122
chr1	145370050	C	G	het	1	0.0434783	ncRNA_exonic	NBPF25P				0.0014
chr1	145375557	C	G	het	2	0.0869565	intronic	NBPF10,NBPF20											rs28605035
chr1	145376001	T	C	het	1	0.0434783	intronic	NBPF10,NBPF20			0.003	0.0014		0.005
chr1	145376169	A	C	het	2	0.0869565	intronic	NBPF10,NBPF20			0.0091	0.0058		0.005					rs55873489
chr1	145376424	A	G	het	3	0.130435	ncRNA_exonic	LOC101928979											rs4582738
chr1	145376527	G	A	het	7	0.304348	ncRNA_splicing	LOC101928979											rs4462084
chr1	145376552	-	T	het	1	0.0434783	ncRNA_exonic;splicing	LOC101928979;LOC101928979
chr1	145376565	C	A	het	4	0.173913	ncRNA_exonic	LOC101928979											rs1699777
chr1	145376658	G	A	het	1	0.0434783	ncRNA_exonic	LOC101928979											rs2312477
chr1	145376668	G	A	het	6	0.26087	ncRNA_exonic	LOC101928979											rs59921087
chr1	145376675	A	T	het	6	0.26087	ncRNA_exonic;splicing	LOC101928979;LOC101928979											rs59736978
chr1	145377105	T	C	het	1	0.0434783	ncRNA_exonic	LOC101928979											rs5015278
chr1	145377156	A	G	het	1	0.0434783	ncRNA_exonic	LOC101928979											rs5015279
chr1	145377272	G	T	het	3	0.130435	ncRNA_exonic	LOC101928979											rs9424912
chr1	145377706	T	C	het	1	0.0434783	ncRNA_intronic	LOC101928979											rs621968
chr1	145377714	A	G	het	1	0.0434783	ncRNA_intronic	LOC101928979											rs61814188
chr1	145382059	T	C	het	3	0.130435	ncRNA_exonic;splicing	LOC101928979;LOC101928979											rs28545670
chr1	145382081	G	C	het	1	0.0434783	ncRNA_exonic	LOC101928979
chr1	145382113	C	A	het	13	0.565217	ncRNA_exonic	LOC101928979											rs12040245
chr1	145382122	T	C	het	7	0.304348	ncRNA_exonic	LOC101928979											rs74119628
chr1	145382124	G	C	het	5	0.217391	ncRNA_exonic	LOC101928979											rs3121125
chr1	145382142	T	C	het	8	0.347826	ncRNA_exonic	LOC101928979											rs72701834
chr1	145382159	G	T	het	1	0.0434783	ncRNA_exonic	LOC101928979
chr1	145382164	ATACATATATATATATATATAT	-	het	1	0.0434783	ncRNA_exonic	LOC101928979											rs72147276
chr1	145382167	C	T	het	1	0.0434783	ncRNA_exonic	LOC101928979											rs72701836
chr1	145382168	ATATATATATATATATAT	-	het	1	0.0434783	ncRNA_exonic	LOC101928979											rs199545193
chr1	145382173	T	C	het	1	0.0434783	ncRNA_exonic	LOC101928979
chr1	145382175	T	C	het	2	0.0869565	ncRNA_exonic	LOC101928979
chr1	145382181	T	C	het	1	0.0434783	ncRNA_exonic	LOC101928979
chr1	145382228	A	G	het	9	0.391304	ncRNA_exonic	LOC101928979											rs72701839
chr1	145382264	C	T	het	11	0.478261	ncRNA_exonic	LOC101928979											rs74119634
chr1	145382371	A	G	het	15	0.652174	ncRNA_exonic	LOC101928979											rs74119635
chr1	145382385	G	A	het	8	0.347826	ncRNA_exonic	LOC101928979											rs76457965
chr1	145487840	T	G	het	1	0.0434783	intronic	LIX1L,NBPF10,NBPF20				0.0029		0.001					rs185769578
chr1	145495064	G	C	het	1	0.0434783	intronic	LIX1L,NBPF10,NBPF20								0.002
chr1	145497616	A	C	het	1	0.0434783	intronic	LIX1L,NBPF10,NBPF20
chr1	145503027	A	T	het	1	0.0434783	intronic	NBPF10,NBPF20
chr1	145507871	C	T	het	1	0.0434783	intronic	NBPF10,NBPF20,RBM8A
chr1	145514914	A	-	het	1	0.0434783	ncRNA_intronic	GNRHR2
chr1	145515603	G	C	het	1	0.0434783	ncRNA_exonic	GNRHR2											rs61743002
chr1	146013577	A	C	het	10	0.434783	ncRNA_intronic	NBPF25P											rs3121368
chr1	146013627	C	G	het	1	0.0434783	ncRNA_intronic	NBPF25P											rs200185894
chr1	146013671	A	G	het	2	0.0869565	ncRNA_intronic	NBPF25P											rs6699421
chr1	146025192	T	A	het	1	0.0434783	ncRNA_intronic	NBPF25P											rs61807262
chr1	146025265	G	A	het	1	0.0434783	ncRNA_intronic	NBPF25P											rs2275179
chr1	146215276	C	T	het	1	0.0434783	ncRNA_intronic	NBPF25P											rs368113016	0	0	0	0	-1.33			0	0	0	0.013		0	-2.511	-2.367	0	-1.251	0.051
chr1	146345979	G	A	het	9	0.391304	ncRNA_intronic	NBPF25P											rs1774464
chr1	156565049	-	C	hom	1	0.0434783	exonic	GPATCH4	frameshift insertion	GPATCH4:NM_015590:exon8:c.1083_1084insG:p.F362fs,GPATCH4:NM_182679:exon8:c.1068_1069insG:p.F357fs
chr1	156565504	T	-	het	1	0.0434783	exonic	GPATCH4	frameshift deletion	GPATCH4:NM_015590:exon8:c.629delA:p.K210fs,GPATCH4:NM_182679:exon8:c.614delA:p.K205fs
chr1	156572052	C	T	het	2	0.0869565	upstream	GPATCH4
chr1	247615066	-	G	het	1	0.0434783	exonic	OR2B11	frameshift insertion	OR2B11:NM_001004492:exon1:c.218_219insC:p.L73fs
chr1	247615838	G	C	het	1	0.0434783	upstream	OR2B11
chr1	247616060	T	-	het	1	0.0434783	upstream	OR2B11
chr1	248801528	G	A	het	1	0.0434783	downstream	OR2T35
chr1	248801538	G	A	het	2	0.0869565	downstream	OR2T35
chr1	248801542	A	G	het	2	0.0869565	downstream	OR2T35											rs372631772
chr1	248801550	C	T	het	3	0.130435	downstream	OR2T35											rs374446105
chr1	248801556	C	T	het	3	0.130435	downstream	OR2T35											rs79649486
chr1	248801566	T	G	het	1	0.0434783	downstream	OR2T35											rs74154510
chr1	248801592	C	T	het	2	0.0869565	exonic	OR2T35	nonsynonymous SNV	OR2T35:NM_001001827:exon1:c.968G>A:p.G323D									rs78622116	0.05	0	0	4.71	0.75			1	0	0	0		2.961	-0.215	0.032	0.127	0.177	4.951	ID=COSM291162;OCCURENCE=1(large_intestine)
chr1	248801602	-	CA	hom	1	0.0434783	exonic	OR2T35	stopgain	OR2T35:NM_001001827:exon1:c.957_958insTG:p.I320_R321delinsX																												ID=COSM246232;OCCURENCE=1(prostate),1(large_intestine)
chr1	248801610	GC	AT	hom	5	0.217391	exonic	OR2T35	nonframeshift substitution	OR2T35:NM_001001827:exon1:c.949_950AT
chr1	248801633	A	G	het	1	0.0434783	exonic	OR2T35	synonymous SNV	OR2T35:NM_001001827:exon1:c.927T>C:p.G309G									rs74901534
chr1	248802763	C	T	het	8	0.347826	upstream	OR2T35											rs1938143
chr10	3180052	T	C	het	1	0.0434783	UTR3	PITRM1
chr10	3182954	-	T	het	1	0.0434783	exonic	PITRM1	frameshift insertion	PITRM1:NM_001242309:exon21:c.2401dupA:p.I801fs,PITRM1:NM_001242307:exon24:c.2698dupA:p.I900fs,PITRM1:NM_014889:exon24:c.2695dupA:p.I899fs
chr10	3183016	-	A	het	1	0.0434783	splicing	PITRM1
chr10	3190392	-	G	het	1	0.0434783	exonic	PITRM1	frameshift insertion	PITRM1:NM_001242307:exon17:c.1962dupC:p.D655fs,PITRM1:NM_014889:exon17:c.1962dupC:p.D655fs
chr10	3201097	T	A	het	1	0.0434783	splicing	PITRM1
chr10	3207414	AAGG	-	het	1	0.0434783	splicing	PITRM1									0.002257	0.001789
chr10	3207417	G	A	het	1	0.0434783	splicing	PITRM1																							4.12189
chr10	3208583	-	GAG	het	1	0.0434783	splicing	PITRM1
chr10	3298634	G	A	het	1	0.0434783	intergenic	PITRM1,KLF6
chr10	3298727	A	T	het	1	0.0434783	intergenic	PITRM1,KLF6
chr10	7528771	C	-	het	1	0.0434783	intergenic	SFMBT2,ITIH5
chr10	7608076	T	-	het	1	0.0434783	exonic	ITIH5	frameshift deletion	ITIH5:NM_032817:exon9:c.1802delA:p.K601fs,ITIH5:NM_030569:exon13:c.2444delA:p.K815fs
chr10	7621716	-	C	het	1	0.0434783	splicing	ITIH5
chr10	21414753	-	A	het	1	0.0434783	exonic	C10orf113	stoploss	C10orf113:NM_001010896:exon2:c.466dupT:p.X156delinsL
chr10	21435342	A	T	het	1	0.0434783	exonic	C10orf113	nonsynonymous SNV	C10orf113:NM_001010896:exon1:c.96T>A:p.S32R,C10orf113:NM_001177483:exon1:c.96T>A:p.S32R									rs200339723	0	0.001	0.005	1.15	1.66			1	0	0	0.043		4.987	0.221	1.15	0.308	0.881	8.577
chr10	32723973	-	A	het	1	0.0434783	ncRNA_exonic	LOC101929431
chr10	32723975	G	A	het	1	0.0434783	ncRNA_exonic	LOC101929431
chr10	32724395	G	-	hom	1	0.0434783	ncRNA_exonic	LOC101929431											rs201722961
chr10	32724913	C	T	het	1	0.0434783	ncRNA_exonic	LOC101929431			0.0015								rs369004138
chr10	32730273	-	T	het	1	0.0434783	ncRNA_exonic	LOC101929431
chr10	32742255	TTA	GAT	het	1	0.0434783	splicing	CCDC7
chr10	32742257	A	T	het	1	0.0434783	splicing	CCDC7
chr10	32760075	G	A	het	1	0.0434783	exonic	CCDC7	synonymous SNV	CCDC7:NM_001026383:exon7:c.594G>A:p.R198R,CCDC7:NM_145023:exon7:c.594G>A:p.R198R
chr10	51769394	A	T	het	1	0.0434783	exonic	AGAP6	synonymous SNV	AGAP6:NM_001077665:exon8:c.1509A>T:p.S503S
chr10	106027395	C	T	het	1	0.0434783	downstream	GSTO1,MIR4482
chr10	116852545	A	-	het	1	0.0434783	upstream	ATRNL1
chr10	116853767	G	-	het	1	0.0434783	exonic	ATRNL1	frameshift deletion	ATRNL1:NM_001276282:exon1:c.258delG:p.V86fs,ATRNL1:NM_207303:exon1:c.258delG:p.V86fs
chr10	116931101	C	T	het	2	0.0869565	exonic	ATRNL1	synonymous SNV	ATRNL1:NM_001276282:exon8:c.1399C>T:p.L467L									rs113157696
chr10	116975564	G	T	het	1	0.0434783	exonic	ATRNL1	synonymous SNV	ATRNL1:NM_207303:exon9:c.1458G>T:p.G486G
chr10	117093773	T	-	het	1	0.0434783	splicing	ATRNL1
chr10	117704625	G	A	het	2	0.0869565	UTR3	ATRNL1
chr10	117704669	-	T	het	1	0.0434783	UTR3	ATRNL1
chr10	125780937	A	-	het	1	0.0434783	splicing	CHST15
chr10	126677089	C	A	het	2	0.0869565	UTR3	CTBP2											rs74349851												4.06801
chr10	126677160	G	A	het	16	0.695652	UTR3	CTBP2											rs1058507												3.94051
chr10	126677195	T	C	het	19	0.826087	UTR3	CTBP2											rs1058501
chr10	126677202	T	C	het	19	0.826087	UTR3	CTBP2											rs1058498
chr10	126677219	T	A	het	10	0.434783	UTR3	CTBP2											rs1058497
chr10	126677243	AAAAG	-	het	1	0.0434783	UTR3	CTBP2
chr10	126677245	AAG	-	het	2	0.0869565	UTR3	CTBP2											rs372862376
chr10	126677262	G	A	het	18	0.782609	UTR3	CTBP2											rs1058493
chr10	126677266	A	T	het	18	0.782609	UTR3	CTBP2											rs1058492												3.95004
chr10	126677280	G	T	het	2	0.0869565	UTR3	CTBP2
chr10	126677288	ACAA	-	het	15	0.652174	UTR3	CTBP2											rs141872148
chr10	126677300	G	T	het	1	0.0434783	UTR3	CTBP2
chr10	126677306	-	T	hom	1	0.0434783	UTR3	CTBP2
chr10	126677308	A	T	het	15	0.652174	UTR3	CTBP2											rs74789620												4.22652
chr10	126677323	A	T	het	17	0.73913	UTR3	CTBP2											rs79546573												4.27447
chr10	126677332	G	A	het	1	0.0434783	UTR3	CTBP2											rs77534653
chr10	126677341	C	T	het	13	0.565217	UTR3	CTBP2											rs2401554
chr10	126677348	C	T	het	12	0.521739	UTR3	CTBP2											rs76429438
chr10	126677361	T	C	het	1	0.0434783	UTR3	CTBP2
chr10	126677363	T	C	het	11	0.478261	UTR3	CTBP2											rs75330281
chr10	126677366	CT	TG	het	2	0.0869565	UTR3	CTBP2
chr10	126677367	T	G	het	12	0.521739	UTR3	CTBP2											rs78608514
chr10	126677391	A	C	het	9	0.391304	UTR3	CTBP2											rs74804366
chr10	126677420	T	C	het	7	0.304348	UTR3	CTBP2											rs80102002
chr10	126677425	G	T	het	7	0.304348	UTR3	CTBP2											rs74198837
chr10	126677429	A	T	het	3	0.130435	UTR3	CTBP2											rs111847330
chr10	126677436	T	G	het	2	0.0869565	UTR3	CTBP2											rs74160992
chr10	126677454	TTTTTTTT	GTTTTTTA	het	1	0.0434783	UTR3	CTBP2
chr10	126677459	TTT	-	het	1	0.0434783	UTR3	CTBP2
chr10	126677461	T	-	het	1	0.0434783	UTR3	CTBP2
chr10	126677472	C	T	het	1	0.0434783	UTR3	CTBP2											rs79335968
chr10	126677478	A	C	het	3	0.130435	UTR3	CTBP2											rs3208625
chr10	126677481	G	C	het	7	0.304348	UTR3	CTBP2											rs3208624
chr10	126677501	G	A	het	4	0.173913	UTR3	CTBP2			0.0083	0.0014		0.001		0.001			rs3208623
chr10	126677507	C	-	het	1	0.0434783	UTR3	CTBP2											rs374125450
chr10	126677515	G	A	het	2	0.0869565	UTR3	CTBP2											rs3205439
chr10	126677523	T	C	het	2	0.0869565	UTR3	CTBP2											rs3208619
chr10	126677537	G	A	het	2	0.0869565	UTR3	CTBP2											rs3208618
chr10	126677541	T	G	het	1	0.0434783	UTR3	CTBP2											rs3208617
chr10	126677553	C	G	het	1	0.0434783	UTR3	CTBP2
chr10	126677862	C	T	het	1	0.0434783	UTR3	CTBP2											rs75489860
chr10	126677888	T	C	het	1	0.0434783	UTR3	CTBP2											rs3208573
chr10	126677902	C	A	het	1	0.0434783	UTR3	CTBP2											rs61870287
chr10	126677950	C	T	het	1	0.0434783	UTR3	CTBP2											rs78126735
chr10	126677963	T	A	het	1	0.0434783	UTR3	CTBP2											rs74737943
chr10	126678040	CTCTTGG	-	het	1	0.0434783	UTR3	CTBP2
chr10	126678055	G	A	het	1	0.0434783	UTR3	CTBP2
chr10	126678063	G	A	het	2	0.0869565	UTR3	CTBP2											rs76905908
chr10	126678065	G	A	het	1	0.0434783	UTR3	CTBP2
chr10	126678075	T	C	het	2	0.0869565	UTR3	CTBP2											rs78512061
chr10	126678087	C	T	het	3	0.130435	exonic	CTBP2	synonymous SNV	CTBP2:NM_022802:exon9:c.2958G>A:p.X986X,CTBP2:NM_001083914:exon11:c.1338G>A:p.X446X,CTBP2:NM_001290214:exon11:c.1338G>A:p.X446X,CTBP2:NM_001290215:exon11:c.1338G>A:p.X446X,CTBP2:NM_001329:exon11:c.1338G>A:p.X446X									rs78981424
chr10	126678092	G	A	het	3	0.130435	exonic	CTBP2	stopgain	CTBP2:NM_022802:exon9:c.2953C>T:p.Q985X,CTBP2:NM_001083914:exon11:c.1333C>T:p.Q445X,CTBP2:NM_001290214:exon11:c.1333C>T:p.Q445X,CTBP2:NM_001290215:exon11:c.1333C>T:p.Q445X,CTBP2:NM_001329:exon11:c.1333C>T:p.Q445X									rs73373169	0.02	0	0	0	5.12			0.626	0	0	0	6.29699	18.759	2.665	6.124	0	6.297	37			602619
chr10	126678102	G	A	het	1	0.0434783	exonic	CTBP2	synonymous SNV	CTBP2:NM_022802:exon9:c.2943C>T:p.H981H,CTBP2:NM_001083914:exon11:c.1323C>T:p.H441H,CTBP2:NM_001290214:exon11:c.1323C>T:p.H441H,CTBP2:NM_001290215:exon11:c.1323C>T:p.H441H,CTBP2:NM_001329:exon11:c.1323C>T:p.H441H									rs75408575
chr10	126678112	T	C	het	1	0.0434783	exonic	CTBP2	nonsynonymous SNV	CTBP2:NM_022802:exon9:c.2933A>G:p.N978S,CTBP2:NM_001083914:exon11:c.1313A>G:p.N438S,CTBP2:NM_001290214:exon11:c.1313A>G:p.N438S,CTBP2:NM_001290215:exon11:c.1313A>G:p.N438S,CTBP2:NM_001329:exon11:c.1313A>G:p.N438S									rs75839774	0.01	0.42	0.406	-1.58	3.98			0.547	-0.345	0.041	0.33		11.061	0.967	1.94	0.333	1.581	11.24			602619
chr10	126678123	T	-	het	1	0.0434783	exonic	CTBP2	frameshift deletion	CTBP2:NM_022802:exon9:c.2922delA:p.K974fs,CTBP2:NM_001083914:exon11:c.1302delA:p.K434fs,CTBP2:NM_001290214:exon11:c.1302delA:p.K434fs,CTBP2:NM_001290215:exon11:c.1302delA:p.K434fs,CTBP2:NM_001329:exon11:c.1302delA:p.K434fs									rs140913543																			ID=COSM111429;OCCURENCE=1(ovary)
chr10	126678128	T	A	het	2	0.0869565	exonic	CTBP2	nonsynonymous SNV	CTBP2:NM_022802:exon9:c.2917A>T:p.T973S,CTBP2:NM_001083914:exon11:c.1297A>T:p.T433S,CTBP2:NM_001290214:exon11:c.1297A>T:p.T433S,CTBP2:NM_001290215:exon11:c.1297A>T:p.T433S,CTBP2:NM_001329:exon11:c.1297A>T:p.T433S									rs76370804	0.17	0.054	0.061	-1.57	5.12			0.536	-0.345	0.052	0.291		15.094	2.153	3.053	0.49	0.122	4.658			602619
chr10	126678147	C	T	het	1	0.0434783	exonic	CTBP2	synonymous SNV	CTBP2:NM_022802:exon9:c.2898G>A:p.A966A,CTBP2:NM_001083914:exon11:c.1278G>A:p.A426A,CTBP2:NM_001290214:exon11:c.1278G>A:p.A426A,CTBP2:NM_001290215:exon11:c.1278G>A:p.A426A,CTBP2:NM_001329:exon11:c.1278G>A:p.A426A					0.001				rs76963654
chr10	126678171	C	G	het	1	0.0434783	exonic	CTBP2	synonymous SNV	CTBP2:NM_022802:exon9:c.2874G>C:p.P958P,CTBP2:NM_001083914:exon11:c.1254G>C:p.P418P,CTBP2:NM_001290214:exon11:c.1254G>C:p.P418P,CTBP2:NM_001290215:exon11:c.1254G>C:p.P418P,CTBP2:NM_001329:exon11:c.1254G>C:p.P418P
chr10	126678177	G	T	het	1	0.0434783	exonic	CTBP2	nonsynonymous SNV	CTBP2:NM_022802:exon9:c.2868C>A:p.N956K,CTBP2:NM_001083914:exon11:c.1248C>A:p.N416K,CTBP2:NM_001290214:exon11:c.1248C>A:p.N416K,CTBP2:NM_001290215:exon11:c.1248C>A:p.N416K,CTBP2:NM_001329:exon11:c.1248C>A:p.N416K										0.02	0.613	0.284	-1.56	3.12			0.892	0	0.003	0.29		10.611	1.39	1.238	0.478	0.66	7.539			602619
chr10	126678189	T	C	het	1	0.0434783	exonic	CTBP2	synonymous SNV	CTBP2:NM_022802:exon9:c.2856A>G:p.P952P,CTBP2:NM_001083914:exon11:c.1236A>G:p.P412P,CTBP2:NM_001290214:exon11:c.1236A>G:p.P412P,CTBP2:NM_001290215:exon11:c.1236A>G:p.P412P,CTBP2:NM_001329:exon11:c.1236A>G:p.P412P
chr10	126678196	C	T	het	1	0.0434783	exonic	CTBP2	nonsynonymous SNV	CTBP2:NM_022802:exon9:c.2849G>A:p.G950D,CTBP2:NM_001083914:exon11:c.1229G>A:p.G410D,CTBP2:NM_001290214:exon11:c.1229G>A:p.G410D,CTBP2:NM_001290215:exon11:c.1229G>A:p.G410D,CTBP2:NM_001329:exon11:c.1229G>A:p.G410D										0	0.968	0.889	-1.74	5.12			1	1.245	0	0.651		18.759	2.665	3.457	0.954	3.383	17.41			602619
chr10	126678246	A	G	het	1	0.0434783	exonic	CTBP2	synonymous SNV	CTBP2:NM_022802:exon9:c.2799T>C:p.G933G,CTBP2:NM_001083914:exon11:c.1179T>C:p.G393G,CTBP2:NM_001290214:exon11:c.1179T>C:p.G393G,CTBP2:NM_001290215:exon11:c.1179T>C:p.G393G,CTBP2:NM_001329:exon11:c.1179T>C:p.G393G									rs114432763																			ID=COSM1603115,COSM1603116;OCCURENCE=1(liver)
chr10	126681804	C	T	het	1	0.0434783	exonic	CTBP2	nonsynonymous SNV	CTBP2:NM_022802:exon7:c.2626G>A:p.A876T,CTBP2:NM_001083914:exon9:c.1006G>A:p.A336T,CTBP2:NM_001290214:exon9:c.1006G>A:p.A336T,CTBP2:NM_001290215:exon9:c.1006G>A:p.A336T,CTBP2:NM_001329:exon9:c.1006G>A:p.A336T									rs11550781	0.13	0.287	0.234	-1.73	4.72			1	0.46	0	0.393		17.89	2.459	7.294	0.67	3.659	18.6	ID=COSM1599968,COSM1599967;OCCURENCE=1(central_nervous_system)		602619
chr10	126681824	G	A	het	1	0.0434783	exonic	CTBP2	nonsynonymous SNV	CTBP2:NM_022802:exon7:c.2606C>T:p.A869V,CTBP2:NM_001083914:exon9:c.986C>T:p.A329V,CTBP2:NM_001290214:exon9:c.986C>T:p.A329V,CTBP2:NM_001290215:exon9:c.986C>T:p.A329V,CTBP2:NM_001329:exon9:c.986C>T:p.A329V										0	0.99	0.521	-2.3	4.72			1	2.51	0	0.682		17.89	2.459	9.229	0.934	3.152	16.54			602619
chr10	126681838	C	G	het	2	0.0869565	exonic	CTBP2	nonsynonymous SNV	CTBP2:NM_022802:exon7:c.2592G>C:p.W864C,CTBP2:NM_001083914:exon9:c.972G>C:p.W324C,CTBP2:NM_001290214:exon9:c.972G>C:p.W324C,CTBP2:NM_001290215:exon9:c.972G>C:p.W324C,CTBP2:NM_001329:exon9:c.972G>C:p.W324C									rs112326539	0.01	0.974	0.69	-1.79	4.72			1	3.155	0	0.703		17.89	2.459	7.294	0.979	2.865	15.54			602619
chr10	126681848	T	A	het	1	0.0434783	exonic	CTBP2	nonsynonymous SNV	CTBP2:NM_022802:exon7:c.2582A>T:p.H861L,CTBP2:NM_001083914:exon9:c.962A>T:p.H321L,CTBP2:NM_001290214:exon9:c.962A>T:p.H321L,CTBP2:NM_001290215:exon9:c.962A>T:p.H321L,CTBP2:NM_001329:exon9:c.962A>T:p.H321L									rs113189640	0	0.999	0.997	-3.7	4.72			1	4.165	0	0.953	4.49348	14.386	1.991	7.499	0.97	4.493	24.1			602619
chr10	126681868	C	G	het	2	0.0869565	exonic	CTBP2	synonymous SNV	CTBP2:NM_022802:exon7:c.2562G>C:p.P854P,CTBP2:NM_001083914:exon9:c.942G>C:p.P314P,CTBP2:NM_001290214:exon9:c.942G>C:p.P314P,CTBP2:NM_001290215:exon9:c.942G>C:p.P314P,CTBP2:NM_001329:exon9:c.942G>C:p.P314P									rs74769610
chr10	126682463	C	T	het	1	0.0434783	exonic	CTBP2	nonsynonymous SNV	CTBP2:NM_022802:exon6:c.2492G>A:p.R831Q,CTBP2:NM_001083914:exon8:c.872G>A:p.R291Q,CTBP2:NM_001290214:exon8:c.872G>A:p.R291Q,CTBP2:NM_001290215:exon8:c.872G>A:p.R291Q,CTBP2:NM_001329:exon8:c.872G>A:p.R291Q										0.02	0.934	0.319	-1.37	5.04			1	0.975	0	0.364	4.25639	18.398	2.348	7.487	0.971	4.256	22.2			602619
chr10	126682468	C	T	het	5	0.217391	exonic	CTBP2	synonymous SNV	CTBP2:NM_022802:exon6:c.2487G>A:p.R829R,CTBP2:NM_001083914:exon8:c.867G>A:p.R289R,CTBP2:NM_001290214:exon8:c.867G>A:p.R289R,CTBP2:NM_001290215:exon8:c.867G>A:p.R289R,CTBP2:NM_001329:exon8:c.867G>A:p.R289R									rs79993000
chr10	126682493	A	C	het	2	0.0869565	exonic	CTBP2	stopgain	CTBP2:NM_022802:exon6:c.2462T>G:p.L821X,CTBP2:NM_001083914:exon8:c.842T>G:p.L281X,CTBP2:NM_001290214:exon8:c.842T>G:p.L281X,CTBP2:NM_001290215:exon8:c.842T>G:p.L281X,CTBP2:NM_001329:exon8:c.842T>G:p.L281X										1	0	0	0	4.93			1	0	0	0	8.27892	14.587	1.846	8.957	0	8.279	40			602619
chr10	126682516	G	A	het	1	0.0434783	exonic	CTBP2	synonymous SNV	CTBP2:NM_022802:exon6:c.2439C>T:p.G813G,CTBP2:NM_001083914:exon8:c.819C>T:p.G273G,CTBP2:NM_001290214:exon8:c.819C>T:p.G273G,CTBP2:NM_001290215:exon8:c.819C>T:p.G273G,CTBP2:NM_001329:exon8:c.819C>T:p.G273G									rs185815738
chr10	126683058	T	G	het	2	0.0869565	exonic	CTBP2	nonsynonymous SNV	CTBP2:NM_022802:exon5:c.2380A>C:p.N794H,CTBP2:NM_001083914:exon7:c.760A>C:p.N254H,CTBP2:NM_001290214:exon7:c.760A>C:p.N254H,CTBP2:NM_001290215:exon7:c.760A>C:p.N254H,CTBP2:NM_001329:exon7:c.760A>C:p.N254H										0	1	0.996	-1.64	5.36			1	2.48	0	0.722	4.39619	15.357	2.03	7.698	0.666	4.396	23.3			602619
chr10	126683062	G	A	het	5	0.217391	exonic	CTBP2	synonymous SNV	CTBP2:NM_022802:exon5:c.2376C>T:p.L792L,CTBP2:NM_001083914:exon7:c.756C>T:p.L252L,CTBP2:NM_001290214:exon7:c.756C>T:p.L252L,CTBP2:NM_001290215:exon7:c.756C>T:p.L252L,CTBP2:NM_001329:exon7:c.756C>T:p.L252L
chr10	126683070	G	A	het	10	0.434783	exonic	CTBP2	nonsynonymous SNV	CTBP2:NM_022802:exon5:c.2368C>T:p.H790Y,CTBP2:NM_001083914:exon7:c.748C>T:p.H250Y,CTBP2:NM_001290214:exon7:c.748C>T:p.H250Y,CTBP2:NM_001290215:exon7:c.748C>T:p.H250Y,CTBP2:NM_001329:exon7:c.748C>T:p.H250Y										0.11	0.868	0.701	-1.36	5.21			1	0.5	0	0.435	4.26155	18.767	2.428	9.476	0.897	4.262	22.2			602619
chr10	126683071	G	C	het	5	0.217391	exonic	CTBP2	nonsynonymous SNV	CTBP2:NM_022802:exon5:c.2367C>G:p.N789K,CTBP2:NM_001083914:exon7:c.747C>G:p.N249K,CTBP2:NM_001290214:exon7:c.747C>G:p.N249K,CTBP2:NM_001290215:exon7:c.747C>G:p.N249K,CTBP2:NM_001329:exon7:c.747C>G:p.N249K									rs61870306	0	1	0.998	-1.41	4.3			1	1.655	0	0.572	3.99305	11.544	2.428	4.247	0.543	3.993	20.5	ID=COSM213712;OCCURENCE=1(breast)		602619
chr10	126683074	A	T	het	10	0.434783	exonic	CTBP2	nonsynonymous SNV	CTBP2:NM_022802:exon5:c.2364T>A:p.H788Q,CTBP2:NM_001083914:exon7:c.744T>A:p.H248Q,CTBP2:NM_001290214:exon7:c.744T>A:p.H248Q,CTBP2:NM_001290215:exon7:c.744T>A:p.H248Q,CTBP2:NM_001329:exon7:c.744T>A:p.H248Q										0.03	0.682	0.383	-1.26	1.37			1	-0.56	0	0.184		8.31	0.279	1.859	0.76	2.74	15.12			602619
chr10	126683075	T	A	het	2	0.0869565	exonic	CTBP2	nonsynonymous SNV	CTBP2:NM_022802:exon5:c.2363A>T:p.H788L,CTBP2:NM_001083914:exon7:c.743A>T:p.H248L,CTBP2:NM_001290214:exon7:c.743A>T:p.H248L,CTBP2:NM_001290215:exon7:c.743A>T:p.H248L,CTBP2:NM_001329:exon7:c.743A>T:p.H248L									rs80273852	0	0.995	0.955	-1.33	5.21			1	0.69	0	0.506	4.47746	15.092	1.966	7.698	0.853	4.477	24	ID=COSM328281;OCCURENCE=1(pancreas)		602619
chr10	126683087	T	C	het	7	0.304348	exonic	CTBP2	nonsynonymous SNV	CTBP2:NM_022802:exon5:c.2351A>G:p.N784S,CTBP2:NM_001083914:exon7:c.731A>G:p.N244S,CTBP2:NM_001290214:exon7:c.731A>G:p.N244S,CTBP2:NM_001290215:exon7:c.731A>G:p.N244S,CTBP2:NM_001329:exon7:c.731A>G:p.N244S									rs61870307	0.23	0.011	0.056	-1.3	4.09			1	0.16	0	0.264		10.379	1.966	2.158	0.353	1.611	11.34			602619
chr10	126683092	G	A	het	15	0.652174	exonic	CTBP2	synonymous SNV	CTBP2:NM_022802:exon5:c.2346C>T:p.H782H,CTBP2:NM_001083914:exon7:c.726C>T:p.H242H,CTBP2:NM_001290214:exon7:c.726C>T:p.H242H,CTBP2:NM_001290215:exon7:c.726C>T:p.H242H,CTBP2:NM_001329:exon7:c.726C>T:p.H242H
chr10	126683099	G	A	het	15	0.652174	exonic	CTBP2	nonsynonymous SNV	CTBP2:NM_022802:exon5:c.2339C>T:p.S780F,CTBP2:NM_001083914:exon7:c.719C>T:p.S240F,CTBP2:NM_001290214:exon7:c.719C>T:p.S240F,CTBP2:NM_001290215:exon7:c.719C>T:p.S240F,CTBP2:NM_001329:exon7:c.719C>T:p.S240F									rs374871777	0	1	0.995	-1.61	5.21			1	2.82	0	0.759	4.52177	18.767	2.428	9.476	0.962	4.522	24.3			602619
chr10	126683103	C	T	het	3	0.130435	exonic	CTBP2	nonsynonymous SNV	CTBP2:NM_022802:exon5:c.2335G>A:p.V779I,CTBP2:NM_001083914:exon7:c.715G>A:p.V239I,CTBP2:NM_001290214:exon7:c.715G>A:p.V239I,CTBP2:NM_001290215:exon7:c.715G>A:p.V239I,CTBP2:NM_001329:exon7:c.715G>A:p.V239I									rs77603788	0.48	0.882	0.441	-1.42	5.21			1	0.36	0	0.324		18.767	2.428	3.835	0.639	2.965	15.89			602619
chr10	126683111	C	T	het	15	0.652174	exonic	CTBP2	nonsynonymous SNV	CTBP2:NM_022802:exon5:c.2327G>A:p.S776N,CTBP2:NM_001083914:exon7:c.707G>A:p.S236N,CTBP2:NM_001290214:exon7:c.707G>A:p.S236N,CTBP2:NM_001290215:exon7:c.707G>A:p.S236N,CTBP2:NM_001329:exon7:c.707G>A:p.S236N									rs78155918	0	0.997	0.979	-1.86	5.21			1	3.655	0	0.835	4.99916	18.767	2.428	7.487	0.591	4.999	29.4			602619
chr10	126683123	A	-	het	1	0.0434783	exonic	CTBP2	frameshift deletion	CTBP2:NM_022802:exon5:c.2315delT:p.L772fs,CTBP2:NM_001083914:exon7:c.695delT:p.L232fs,CTBP2:NM_001290214:exon7:c.695delT:p.L232fs,CTBP2:NM_001290215:exon7:c.695delT:p.L232fs,CTBP2:NM_001329:exon7:c.695delT:p.L232fs
chr10	126683132	A	T	het	17	0.73913	exonic	CTBP2	nonsynonymous SNV	CTBP2:NM_022802:exon5:c.2306T>A:p.L769Q,CTBP2:NM_001083914:exon7:c.686T>A:p.L229Q,CTBP2:NM_001290214:exon7:c.686T>A:p.L229Q,CTBP2:NM_001290215:exon7:c.686T>A:p.L229Q,CTBP2:NM_001329:exon7:c.686T>A:p.L229Q									rs150320719	0	1	0.999	-1.85	5.42			1	2.835	0	0.782	4.55933	15.466	2.054	8.962	0.972	4.559	24.7			602619
chr10	126683146	C	A	het	17	0.73913	exonic	CTBP2	nonsynonymous SNV	CTBP2:NM_022802:exon5:c.2292G>T:p.Q764H,CTBP2:NM_001083914:exon7:c.672G>T:p.Q224H,CTBP2:NM_001290214:exon7:c.672G>T:p.Q224H,CTBP2:NM_001290215:exon7:c.672G>T:p.Q224H,CTBP2:NM_001329:exon7:c.672G>T:p.Q224H									rs80025996	0	0.996	0.954	-1.71	4.51			1	0.535	0	0.526	4.52717	13.27	1.255	3.829	0.874	4.527	24.4			602619
chr10	126683151	C	T	het	4	0.173913	exonic	CTBP2	nonsynonymous SNV	CTBP2:NM_022802:exon5:c.2287G>A:p.V763M,CTBP2:NM_001083914:exon7:c.667G>A:p.V223M,CTBP2:NM_001290214:exon7:c.667G>A:p.V223M,CTBP2:NM_001290215:exon7:c.667G>A:p.V223M,CTBP2:NM_001329:exon7:c.667G>A:p.V223M									rs76203768	0	0.99	0.668	-1.45	5.42			1	1.85	0	0.548		19.224	2.539	3.809	0.863	3.704	18.81	ID=COSM1603119,COSM1603120;OCCURENCE=1(liver)		602619
chr10	126683152	G	A	het	17	0.73913	exonic	CTBP2	synonymous SNV	CTBP2:NM_022802:exon5:c.2286C>T:p.G762G,CTBP2:NM_001083914:exon7:c.666C>T:p.G222G,CTBP2:NM_001290214:exon7:c.666C>T:p.G222G,CTBP2:NM_001290215:exon7:c.666C>T:p.G222G,CTBP2:NM_001329:exon7:c.666C>T:p.G222G									rs78653489
chr10	126683162	C	T	het	8	0.347826	exonic	CTBP2	nonsynonymous SNV	CTBP2:NM_022802:exon5:c.2276G>A:p.R759Q,CTBP2:NM_001083914:exon7:c.656G>A:p.R219Q,CTBP2:NM_001290214:exon7:c.656G>A:p.R219Q,CTBP2:NM_001290215:exon7:c.656G>A:p.R219Q,CTBP2:NM_001329:exon7:c.656G>A:p.R219Q									rs75420260	0.07	0.977	0.505	-1.33	5.42			1	0.57	0	0.38	4.07019	19.224	2.539	7.487	0.903	4.07	20.9			602619
chr10	126683166	C	A	het	1	0.0434783	exonic	CTBP2	stopgain	CTBP2:NM_022802:exon5:c.2272G>T:p.E758X,CTBP2:NM_001083914:exon7:c.652G>T:p.E218X,CTBP2:NM_001290214:exon7:c.652G>T:p.E218X,CTBP2:NM_001290215:exon7:c.652G>T:p.E218X,CTBP2:NM_001329:exon7:c.652G>T:p.E218X										0.02	0	0	0	5.42			1	0	0	0	8.55042	19.224	2.539	7.487	0	8.55	41			602619
chr10	126683190	C	A	het	7	0.304348	exonic	CTBP2	nonsynonymous SNV	CTBP2:NM_022802:exon5:c.2248G>T:p.D750Y,CTBP2:NM_001083914:exon7:c.628G>T:p.D210Y,CTBP2:NM_001290214:exon7:c.628G>T:p.D210Y,CTBP2:NM_001290215:exon7:c.628G>T:p.D210Y,CTBP2:NM_001329:exon7:c.628G>T:p.D210Y									rs78681531	0	1	0.999	-1.71	5.42			1	3.89	0	0.826	4.90222	19.224	2.539	7.487	0.992	4.902	28.2			602619
chr10	126683197	T	C	het	4	0.173913	exonic	CTBP2	nonsynonymous SNV	CTBP2:NM_022802:exon5:c.2241A>G:p.I747M,CTBP2:NM_001083914:exon7:c.621A>G:p.I207M,CTBP2:NM_001290214:exon7:c.621A>G:p.I207M,CTBP2:NM_001290215:exon7:c.621A>G:p.I207M,CTBP2:NM_001329:exon7:c.621A>G:p.I207M									rs74341800	0.02	0.07	0.448	-1.57	-2.99			0.998	1.565	0	0.519		13.309	-0.53	-1.138	0.704	3.47	17.77			602619
chr10	126683225	C	G	het	2	0.0869565	exonic	CTBP2	nonsynonymous SNV	CTBP2:NM_022802:exon5:c.2213G>C:p.R738P,CTBP2:NM_001083914:exon7:c.593G>C:p.R198P,CTBP2:NM_001290214:exon7:c.593G>C:p.R198P,CTBP2:NM_001290215:exon7:c.593G>C:p.R198P,CTBP2:NM_001329:exon7:c.593G>C:p.R198P										0	0.981	0.981	-1.55	5.57			1	3.325	0	0.793	5.3193	19.547	2.619	7.487	0.993	5.319	34	ID=COSM1603122,COSM1603121;OCCURENCE=1(liver)		602619
chr10	126686557	C	T	het	4	0.173913	exonic	CTBP2	nonsynonymous SNV	CTBP2:NM_022802:exon4:c.2161G>A:p.E721K,CTBP2:NM_001083914:exon6:c.541G>A:p.E181K,CTBP2:NM_001290214:exon6:c.541G>A:p.E181K,CTBP2:NM_001290215:exon6:c.541G>A:p.E181K,CTBP2:NM_001329:exon6:c.541G>A:p.E181K										0.6	0.337	0.292	-1.07	4.73			1	-1.91	0	0.152		18.072	2.329	7.471	0.944	3.209	16.75			602619
chr10	126686564	G	A	het	4	0.173913	exonic	CTBP2	synonymous SNV	CTBP2:NM_022802:exon4:c.2154C>T:p.I718I,CTBP2:NM_001083914:exon6:c.534C>T:p.I178I,CTBP2:NM_001290214:exon6:c.534C>T:p.I178I,CTBP2:NM_001290215:exon6:c.534C>T:p.I178I,CTBP2:NM_001329:exon6:c.534C>T:p.I178I									rs76961061
chr10	126686574	G	A	het	5	0.217391	exonic	CTBP2	nonsynonymous SNV	CTBP2:NM_022802:exon4:c.2144C>T:p.A715V,CTBP2:NM_001083914:exon6:c.524C>T:p.A175V,CTBP2:NM_001290214:exon6:c.524C>T:p.A175V,CTBP2:NM_001290215:exon6:c.524C>T:p.A175V,CTBP2:NM_001329:exon6:c.524C>T:p.A175V									rs76390727	0.01	0.998	0.868	-1.37	4.73			1	-0.235	0	0.409		18.072	2.329	9.455	0.833	3.694	18.77			602619
chr10	126686593	G	A	het	5	0.217391	exonic	CTBP2	nonsynonymous SNV	CTBP2:NM_022802:exon4:c.2125C>T:p.R709C,CTBP2:NM_001083914:exon6:c.505C>T:p.R169C,CTBP2:NM_001290214:exon6:c.505C>T:p.R169C,CTBP2:NM_001290215:exon6:c.505C>T:p.R169C,CTBP2:NM_001329:exon6:c.505C>T:p.R169C									rs78860838	0	0.995	0.801	-1.44	4.73			1	0.435	0	0.451	4.65713	18.072	2.329	5.108	0.934	4.657	25.6			602619
chr10	126686605	C	T	het	3	0.130435	exonic	CTBP2	nonsynonymous SNV	CTBP2:NM_022802:exon4:c.2113G>A:p.V705M,CTBP2:NM_001083914:exon6:c.493G>A:p.V165M,CTBP2:NM_001290214:exon6:c.493G>A:p.V165M,CTBP2:NM_001290215:exon6:c.493G>A:p.V165M,CTBP2:NM_001329:exon6:c.493G>A:p.V165M								0.000116	rs74442958	0.01	0.993	0.734	-1.75	4.73			1	0.265	0	0.501		18.072	2.329	4.686	0.701	3.729	18.93			602619
chr10	126686619	G	T	het	2	0.0869565	exonic	CTBP2	nonsynonymous SNV	CTBP2:NM_022802:exon4:c.2099C>A:p.T700K,CTBP2:NM_001083914:exon6:c.479C>A:p.T160K,CTBP2:NM_001290214:exon6:c.479C>A:p.T160K,CTBP2:NM_001290215:exon6:c.479C>A:p.T160K,CTBP2:NM_001329:exon6:c.479C>A:p.T160K										0.45	0.603	0.155	-1.25	3.75			1	-0.66	0	0.157		14.611	2.329	3.806	0.854	2.008	12.67			602619
chr10	126686629	G	A	het	1	0.0434783	exonic	CTBP2	nonsynonymous SNV	CTBP2:NM_022802:exon4:c.2089C>T:p.R697W,CTBP2:NM_001083914:exon6:c.469C>T:p.R157W,CTBP2:NM_001290214:exon6:c.469C>T:p.R157W,CTBP2:NM_001290215:exon6:c.469C>T:p.R157W,CTBP2:NM_001329:exon6:c.469C>T:p.R157W									rs74523764	0	0.904	0.395	-1.62	4.73			1	3.055	0	0.595		13.877	2.329	3.787	0.961	3.814	19.37			602619
chr10	126686648	C	T	het	1	0.0434783	exonic	CTBP2	synonymous SNV	CTBP2:NM_022802:exon4:c.2070G>A:p.T690T,CTBP2:NM_001083914:exon6:c.450G>A:p.T150T,CTBP2:NM_001290214:exon6:c.450G>A:p.T150T,CTBP2:NM_001290215:exon6:c.450G>A:p.T150T,CTBP2:NM_001329:exon6:c.450G>A:p.T150T									rs75826544
chr10	126686665	G	T	het	1	0.0434783	exonic	CTBP2	nonsynonymous SNV	CTBP2:NM_022802:exon4:c.2053C>A:p.L685M,CTBP2:NM_001083914:exon6:c.433C>A:p.L145M,CTBP2:NM_001290214:exon6:c.433C>A:p.L145M,CTBP2:NM_001290215:exon6:c.433C>A:p.L145M,CTBP2:NM_001329:exon6:c.433C>A:p.L145M									rs77909283	0.08	0.999	0.99	-1.67	4.73			1	2.07	0	0.69	4.08992	18.072	2.329	6.078	0.872	4.09	21			602619
chr10	126686672	G	A	het	1	0.0434783	exonic	CTBP2	synonymous SNV	CTBP2:NM_022802:exon4:c.2046C>T:p.I682I,CTBP2:NM_001083914:exon6:c.426C>T:p.I142I,CTBP2:NM_001290214:exon6:c.426C>T:p.I142I,CTBP2:NM_001290215:exon6:c.426C>T:p.I142I,CTBP2:NM_001329:exon6:c.426C>T:p.I142I									rs76229685
chr10	126686714	A	G	het	1	0.0434783	exonic	CTBP2	synonymous SNV	CTBP2:NM_022802:exon4:c.2004T>C:p.S668S,CTBP2:NM_001083914:exon6:c.384T>C:p.S128S,CTBP2:NM_001290214:exon6:c.384T>C:p.S128S,CTBP2:NM_001290215:exon6:c.384T>C:p.S128S,CTBP2:NM_001329:exon6:c.384T>C:p.S128S									rs79189060
chr10	126691552	T	G	het	3	0.130435	exonic	CTBP2	nonsynonymous SNV	CTBP2:NM_022802:exon3:c.1955A>C:p.D652A,CTBP2:NM_001083914:exon5:c.335A>C:p.D112A,CTBP2:NM_001290214:exon5:c.335A>C:p.D112A,CTBP2:NM_001290215:exon5:c.335A>C:p.D112A,CTBP2:NM_001329:exon5:c.335A>C:p.D112A										0	0.997	0.926	-3.5	4.68			1	3.07	0	0.913		14.428	1.879	8.04	0.987	3.567	18.18			602619
chr10	126691563	A	G	het	5	0.217391	exonic	CTBP2	synonymous SNV	CTBP2:NM_022802:exon3:c.1944T>C:p.Y648Y,CTBP2:NM_001083914:exon5:c.324T>C:p.Y108Y,CTBP2:NM_001290214:exon5:c.324T>C:p.Y108Y,CTBP2:NM_001290215:exon5:c.324T>C:p.Y108Y,CTBP2:NM_001329:exon5:c.324T>C:p.Y108Y
chr10	126691575	T	C	het	7	0.304348	exonic	CTBP2	nonsynonymous SNV	CTBP2:NM_022802:exon3:c.1932A>G:p.I644M,CTBP2:NM_001083914:exon5:c.312A>G:p.I104M,CTBP2:NM_001290214:exon5:c.312A>G:p.I104M,CTBP2:NM_001290215:exon5:c.312A>G:p.I104M,CTBP2:NM_001329:exon5:c.312A>G:p.I104M									rs112239066	0.01	0.328	0.722	0.49	-0.385			1	1.225	0	0.204		9.404	0.05	-0.041	0.848	1.968	12.54			602619
chr10	126691577	T	C	het	5	0.217391	exonic	CTBP2	nonsynonymous SNV	CTBP2:NM_022802:exon3:c.1930A>G:p.I644V,CTBP2:NM_001083914:exon5:c.310A>G:p.I104V,CTBP2:NM_001290214:exon5:c.310A>G:p.I104V,CTBP2:NM_001290215:exon5:c.310A>G:p.I104V,CTBP2:NM_001329:exon5:c.310A>G:p.I104V									rs112508291	0.02	0.269	0.279	0.75	4.94			1	0.59	0	0.114		14.902	1.998	8.04	0.644	1.971	12.55			602619
chr10	126691579	C	T	het	5	0.217391	exonic	CTBP2	nonsynonymous SNV	CTBP2:NM_022802:exon3:c.1928G>A:p.R643Q,CTBP2:NM_001083914:exon5:c.308G>A:p.R103Q,CTBP2:NM_001290214:exon5:c.308G>A:p.R103Q,CTBP2:NM_001290215:exon5:c.308G>A:p.R103Q,CTBP2:NM_001329:exon5:c.308G>A:p.R103Q										0.01	0.997	0.955	0.74	4.04			1	2.595	0	0.302		13.592	1.23	7.818	0.95	3.888	19.76			602619
chr10	126691580	G	C	het	1	0.0434783	exonic	CTBP2	nonsynonymous SNV	CTBP2:NM_022802:exon3:c.1927C>G:p.R643G,CTBP2:NM_001083914:exon5:c.307C>G:p.R103G,CTBP2:NM_001290214:exon5:c.307C>G:p.R103G,CTBP2:NM_001290215:exon5:c.307C>G:p.R103G,CTBP2:NM_001329:exon5:c.307C>G:p.R103G										0	1	0.999	0.68	3.08			1	3.75	0	0.393		11.148	0.614	6.662	0.989	2.633	14.77			602619
chr10	126691605	C	A	het	8	0.347826	exonic	CTBP2	nonsynonymous SNV	CTBP2:NM_022802:exon3:c.1902G>T:p.K634N,CTBP2:NM_001083914:exon5:c.282G>T:p.K94N,CTBP2:NM_001290214:exon5:c.282G>T:p.K94N,CTBP2:NM_001290215:exon5:c.282G>T:p.K94N,CTBP2:NM_001329:exon5:c.282G>T:p.K94N									rs201760950	0.02	0.986	0.89	0.72	4.03			1	1.515	0	0.177		6.007	1.204	2.555	0.518	2.828	15.42			602619
chr10	126691608	C	T	het	6	0.26087	exonic	CTBP2	synonymous SNV	CTBP2:NM_022802:exon3:c.1899G>A:p.E633E,CTBP2:NM_001083914:exon5:c.279G>A:p.E93E,CTBP2:NM_001290214:exon5:c.279G>A:p.E93E,CTBP2:NM_001290215:exon5:c.279G>A:p.E93E,CTBP2:NM_001329:exon5:c.279G>A:p.E93E									rs200173220
chr10	126691617	C	T	het	1	0.0434783	exonic	CTBP2	synonymous SNV	CTBP2:NM_022802:exon3:c.1890G>A:p.E630E,CTBP2:NM_001083914:exon5:c.270G>A:p.E90E,CTBP2:NM_001290214:exon5:c.270G>A:p.E90E,CTBP2:NM_001290215:exon5:c.270G>A:p.E90E,CTBP2:NM_001329:exon5:c.270G>A:p.E90E
chr10	126691631	T	A	het	5	0.217391	exonic	CTBP2	nonsynonymous SNV	CTBP2:NM_022802:exon3:c.1876A>T:p.T626S,CTBP2:NM_001083914:exon5:c.256A>T:p.T86S,CTBP2:NM_001290214:exon5:c.256A>T:p.T86S,CTBP2:NM_001290215:exon5:c.256A>T:p.T86S,CTBP2:NM_001329:exon5:c.256A>T:p.T86S									rs3198936	0.02	0.041	0.069	-1.93	3.79			0.999	1.21	0	0.453		11.226	0.824	5.018	0.622	2.408	14.01			602619
chr10	126691634	T	A	het	6	0.26087	exonic	CTBP2	nonsynonymous SNV	CTBP2:NM_022802:exon3:c.1873A>T:p.I625F,CTBP2:NM_001083914:exon5:c.253A>T:p.I85F,CTBP2:NM_001290214:exon5:c.253A>T:p.I85F,CTBP2:NM_001290215:exon5:c.253A>T:p.I85F,CTBP2:NM_001329:exon5:c.253A>T:p.I85F									rs75794788	0	0.972	0.946	0.6	3.79			1	1.455	0	0.246	4.56283	11.226	0.824	8.033	0.862	4.563	24.7			602619
chr10	126691952	A	G	het	5	0.217391	exonic	CTBP2	synonymous SNV	CTBP2:NM_022802:exon2:c.1788T>C:p.T596T,CTBP2:NM_001083914:exon4:c.168T>C:p.T56T,CTBP2:NM_001290214:exon4:c.168T>C:p.T56T,CTBP2:NM_001290215:exon4:c.168T>C:p.T56T,CTBP2:NM_001329:exon4:c.168T>C:p.T56T							0.000681	0.000233	rs371690339
chr10	126691979	C	G	het	6	0.26087	exonic	CTBP2	nonsynonymous SNV	CTBP2:NM_022802:exon2:c.1761G>C:p.E587D,CTBP2:NM_001083914:exon4:c.141G>C:p.E47D,CTBP2:NM_001290214:exon4:c.141G>C:p.E47D,CTBP2:NM_001290215:exon4:c.141G>C:p.E47D,CTBP2:NM_001329:exon4:c.141G>C:p.E47D									rs3198926	0.06	0.421	0.528	0.68	3.8			1	2.77	0	0.255	4.93073	13.51	1.098	3.317	0.827	4.931	28.6			602619
chr10	126691994	G	A	het	1	0.0434783	exonic	CTBP2	synonymous SNV	CTBP2:NM_022802:exon2:c.1746C>T:p.R582R,CTBP2:NM_001083914:exon4:c.126C>T:p.R42R,CTBP2:NM_001290214:exon4:c.126C>T:p.R42R,CTBP2:NM_001290215:exon4:c.126C>T:p.R42R,CTBP2:NM_001329:exon4:c.126C>T:p.R42R									rs202167377
chr10	126691997	G	T	het	1	0.0434783	exonic	CTBP2	synonymous SNV	CTBP2:NM_022802:exon2:c.1743C>A:p.G581G,CTBP2:NM_001083914:exon4:c.123C>A:p.G41G,CTBP2:NM_001290214:exon4:c.123C>A:p.G41G,CTBP2:NM_001290215:exon4:c.123C>A:p.G41G,CTBP2:NM_001329:exon4:c.123C>A:p.G41G
chr10	126692000	G	A	het	2	0.0869565	exonic	CTBP2	synonymous SNV	CTBP2:NM_022802:exon2:c.1740C>T:p.D580D,CTBP2:NM_001083914:exon4:c.120C>T:p.D40D,CTBP2:NM_001290214:exon4:c.120C>T:p.D40D,CTBP2:NM_001290215:exon4:c.120C>T:p.D40D,CTBP2:NM_001329:exon4:c.120C>T:p.D40D									rs3198923
chr10	126692009	C	A	het	2	0.0869565	exonic	CTBP2	synonymous SNV	CTBP2:NM_022802:exon2:c.1731G>T:p.A577A,CTBP2:NM_001083914:exon4:c.111G>T:p.A37A,CTBP2:NM_001290214:exon4:c.111G>T:p.A37A,CTBP2:NM_001290215:exon4:c.111G>T:p.A37A,CTBP2:NM_001329:exon4:c.111G>T:p.A37A
chr10	126692017	G	C	het	1	0.0434783	exonic	CTBP2	nonsynonymous SNV	CTBP2:NM_022802:exon2:c.1723C>G:p.L575V,CTBP2:NM_001083914:exon4:c.103C>G:p.L35V,CTBP2:NM_001290214:exon4:c.103C>G:p.L35V,CTBP2:NM_001290215:exon4:c.103C>G:p.L35V,CTBP2:NM_001329:exon4:c.103C>G:p.L35V									rs3198920	0.06	0.997	0.971	0.56	1.83			1	1.955	0	0.257		9.074	0.176	2.72	0.772	1.617	11.36			602619
chr10	126692019	G	A	het	1	0.0434783	exonic	CTBP2	nonsynonymous SNV	CTBP2:NM_022802:exon2:c.1721C>T:p.P574L,CTBP2:NM_001083914:exon4:c.101C>T:p.P34L,CTBP2:NM_001290214:exon4:c.101C>T:p.P34L,CTBP2:NM_001290215:exon4:c.101C>T:p.P34L,CTBP2:NM_001329:exon4:c.101C>T:p.P34L										0	1	0.998	0.4	3.81			1	1.955	0	0.31		15.129	1.107	9.869	0.845	3.342	17.25			602619
chr10	126715026	-	G	het	1	0.0434783	exonic	CTBP2	frameshift insertion	CTBP2:NM_022802:exon1:c.1302dupC:p.S435fs
chr10	126715432	C	T	het	1	0.0434783	exonic	CTBP2	synonymous SNV	CTBP2:NM_022802:exon1:c.897G>A:p.A299A
chr10	126716115	G	A	het	1	0.0434783	exonic	CTBP2	nonsynonymous SNV	CTBP2:NM_022802:exon1:c.214C>T:p.R72W								0.000233	rs146900874	0	0.998	0.629	-3.62	4.55			1	0	0.182	0.85	4.49814	17.885	2.531	4.663	0.171	4.498	24.1			602619
chr10	126727587	G	A	het	2	0.0869565	exonic	CTBP2	stopgain	CTBP2:NM_001083914:exon3:c.37C>T:p.R13X,CTBP2:NM_001290214:exon3:c.37C>T:p.R13X,CTBP2:NM_001290215:exon3:c.37C>T:p.R13X,CTBP2:NM_001329:exon3:c.37C>T:p.R13X										1	0	0	0	5.28			1	0	0	0	6.25244	17.286	2.746	6.881	0	6.252	37			602619
chr10	126727602	T	A	het	18	0.782609	exonic	CTBP2	stopgain	CTBP2:NM_001083914:exon3:c.22A>T:p.K8X,CTBP2:NM_001290214:exon3:c.22A>T:p.K8X,CTBP2:NM_001290215:exon3:c.22A>T:p.K8X,CTBP2:NM_001329:exon3:c.22A>T:p.K8X									rs76555439	1	0	0	0	5.28			1	0	0	0	6.12958	13.948	2.217	5.606	0	6.13	37			602619
chr10	126727604	T	C	het	18	0.782609	exonic	CTBP2	nonsynonymous SNV	CTBP2:NM_001083914:exon3:c.20A>G:p.H7R,CTBP2:NM_001290214:exon3:c.20A>G:p.H7R,CTBP2:NM_001290215:exon3:c.20A>G:p.H7R,CTBP2:NM_001329:exon3:c.20A>G:p.H7R									rs3208567	0.46	0	0.001	-1.53	5.28			1	1.61	0	0.384		13.948	2.217	5.606	0.78	2.124	13.06			602619
chr10	126727606	C	T	het	1	0.0434783	exonic	CTBP2	synonymous SNV	CTBP2:NM_001083914:exon3:c.18G>A:p.K6K,CTBP2:NM_001290214:exon3:c.18G>A:p.K6K,CTBP2:NM_001290215:exon3:c.18G>A:p.K6K,CTBP2:NM_001329:exon3:c.18G>A:p.K6K
chr10	126727615	A	-	het	2	0.0869565	exonic	CTBP2	frameshift deletion	CTBP2:NM_001083914:exon3:c.9delT:p.L3fs,CTBP2:NM_001290214:exon3:c.9delT:p.L3fs,CTBP2:NM_001290215:exon3:c.9delT:p.L3fs,CTBP2:NM_001329:exon3:c.9delT:p.L3fs									rs144283283																			ID=COSM1346604;OCCURENCE=5(large_intestine)
chr10	126727619	G	A	het	2	0.0869565	exonic	CTBP2	nonsynonymous SNV	CTBP2:NM_001083914:exon3:c.5C>T:p.A2V,CTBP2:NM_001290214:exon3:c.5C>T:p.A2V,CTBP2:NM_001290215:exon3:c.5C>T:p.A2V,CTBP2:NM_001329:exon3:c.5C>T:p.A2V										0.11	0.007	0.003	-1.68	4.38			1	1.245	0	0.415		13.804	1.446	6.881	0.613	3.251	16.9			602619
chr10	126727630	T	C	het	1	0.0434783	UTR5	CTBP2											rs76319950
chr10	126727635	C	A	het	4	0.173913	UTR5	CTBP2											rs111734500
chr10	126727647	C	G	het	2	0.0869565	UTR5	CTBP2											rs111586839
chr10	126727649	G	T	het	1	0.0434783	UTR5	CTBP2
chr10	126727659	C	T	het	3	0.130435	UTR5	CTBP2											rs78519366
chr10	126727690	T	C	het	8	0.347826	UTR5	CTBP2											rs78386325
chr10	126727702	C	T	het	2	0.0869565	UTR5	CTBP2											rs150610303
chr10	126727711	C	T	het	1	0.0434783	splicing	CTBP2							0.001
chr10	126855414	T	C	het	1	0.0434783	intergenic	CTBP2,TEX36-AS1
chr10	127162445	A	T	het	1	0.0434783	intergenic	CTBP2,TEX36-AS1
chr10	127162446	AT	TG	het	1	0.0434783	intergenic	CTBP2,TEX36-AS1
chr10	127162447	T	A	het	1	0.0434783	intergenic	CTBP2,TEX36-AS1
chr10	127162448	T	G	het	1	0.0434783	intergenic	CTBP2,TEX36-AS1											rs74793666
chr11	4231923	-	G	het	1	0.0434783	intergenic	LOC100506082,OR52B4
chr11	4232619	G	A	het	1	0.0434783	intergenic	LOC100506082,OR52B4
chr11	4232627	C	A	het	1	0.0434783	intergenic	LOC100506082,OR52B4
chr11	4233014	AGA	GTC	het	2	0.0869565	intergenic	LOC100506082,OR52B4
chr11	4263655	A	G	het	1	0.0434783	intergenic	LOC100506082,OR52B4											rs74461305
chr11	4263742	C	T	het	1	0.0434783	intergenic	LOC100506082,OR52B4											rs79194077
chr11	4389346	G	-	het	1	0.0434783	exonic	OR52B4	frameshift deletion	OR52B4:NM_001005161:exon1:c.180delC:p.P60fs
chr11	4536290	A	T	het	2	0.0869565	intergenic	OR52K1,OR52M1
chr11	4536291	GGATAT	-	het	1	0.0434783	intergenic	OR52K1,OR52M1											rs200527607
chr11	4536296	-	GGATATGGATAT	het	1	0.0434783	intergenic	OR52K1,OR52M1
chr11	4536376	A	C	het	1	0.0434783	intergenic	OR52K1,OR52M1			0.0008
chr11	4565545	TAA	-	het	1	0.0434783	upstream	OR52M1
chr11	4565547	A	-	het	1	0.0434783	upstream	OR52M1
chr11	4567843	T	A	het	1	0.0434783	downstream	OR52M1
chr11	4567845	T	-	het	1	0.0434783	downstream	OR52M1
chr11	4567985	T	C	het	1	0.0434783	downstream	OR52M1				0.0029		0.003		0.0031			rs143144310
chr11	4591833	C	T	hom	4	0.173913	downstream	C11orf40											rs11032857
chr11	4592062	T	A	het	1	0.0434783	downstream	C11orf40			0.0076
chr11	4592708	-	AG	het	3	0.130435	exonic	C11orf40	frameshift insertion	C11orf40:NM_144663:exon4:c.598_599insCT:p.C200fs									rs71280817																			ID=COSM1475443;OCCURENCE=2(breast)
chr11	4594535	C	A	het	1	0.0434783	splicing	C11orf40												0	0	0	0	-2.89			1	0	0	0		4.587	-1.762	-1.225	0	-1.077	0.165
chr11	4599456	-	A	het	1	0.0434783	upstream	C11orf40
chr11	4599841	T	-	het	1	0.0434783	upstream	C11orf40
chr11	4609709	-	T	het	1	0.0434783	downstream	OR52I2
chr11	5172786	A	-	het	1	0.0434783	exonic	OR52A1	frameshift deletion	OR52A1:NM_012375:exon1:c.814delT:p.S272fs
chr11	5173086	A	-	het	1	0.0434783	exonic	OR52A1	frameshift deletion	OR52A1:NM_012375:exon1:c.514delT:p.Y172fs
chr11	5191693	T	C	het	3	0.130435	intergenic	OR52A1,OR51V1			0.0015					0.001			rs374394974
chr11	5191749	G	A	het	1	0.0434783	intergenic	OR52A1,OR51V1
chr11	17373158	CCCGAGT	-	het	1	0.0434783	upstream	NCR3LG1
chr11	17402249	C	T	het	1	0.0434783	intergenic	NCR3LG1,KCNJ11			0.0045								rs191377477
chr11	17402318	T	C	het	1	0.0434783	intergenic	NCR3LG1,KCNJ11
chr11	17403058	-	A	het	1	0.0434783	intergenic	NCR3LG1,KCNJ11
chr11	17403157	A	-	het	1	0.0434783	intergenic	NCR3LG1,KCNJ11
chr11	34133586	TG	CA	het	1	0.0434783	splicing	NAT10
chr11	34163370	-	C	het	1	0.0434783	splicing	NAT10
chr11	34168310	T	G	het	3	0.130435	UTR3	NAT10
chr11	34168322	T	G	het	3	0.130435	UTR3	NAT10											rs202047242
chr11	34168327	A	G	het	4	0.173913	UTR3	NAT10											rs72910812
chr11	34168391	C	T	het	2	0.0869565	UTR3	NAT10
chr11	46164511	A	G	het	1	0.0434783	intergenic	PHF21A,LOC101928894
chr11	46164524	G	A	het	1	0.0434783	intergenic	PHF21A,LOC101928894
chr11	46198459	T	G	het	1	0.0434783	ncRNA_exonic	LOC101928894						0.002		0.0082			rs150542428
chr11	46235661	-	T	het	1	0.0434783	intergenic	LOC101928894,CREB3L1
chr11	46299483	C	A	het	1	0.0434783	UTR5	CREB3L1
chr11	46342258	CA	AG	het	1	0.0434783	splicing	CREB3L1
chr11	46342941	C	A	het	1	0.0434783	UTR3	CREB3L1
chr11	46342943	A	T	het	1	0.0434783	UTR3	CREB3L1
chr11	48345516	G	C	het	3	0.130435	upstream	OR4C3											rs77969980
chr11	48345525	-	TTTTAAG	het	1	0.0434783	upstream	OR4C3											rs145269076
chr11	48345541	A	G	het	1	0.0434783	upstream	OR4C3											rs10839499
chr11	48345556	C	T	het	2	0.0869565	upstream	OR4C3											rs78633983
chr11	48345572	C	A	het	1	0.0434783	upstream	OR4C3											rs72911447
chr11	48345582	C	T	het	1	0.0434783	upstream	OR4C3											rs7395141
chr11	48345693	AG	GA	het	5	0.217391	upstream	OR4C3
chr11	48345730	T	C	het	2	0.0869565	upstream	OR4C3											rs73463981
chr11	48345791	T	C	het	11	0.478261	upstream	OR4C3											rs75751890
chr11	48345815	C	T	het	13	0.565217	upstream	OR4C3											rs77286867
chr11	48345889	T	G	het	12	0.521739	upstream	OR4C3											rs73463984
chr11	48345903	C	T	het	12	0.521739	upstream	OR4C3											rs73463986
chr11	48345952	A	G	het	11	0.478261	upstream	OR4C3											rs75228681
chr11	48345972	GC	AT	het	5	0.217391	upstream	OR4C3
chr11	48345992	G	A	het	3	0.130435	upstream	OR4C3											rs4315071
chr11	48346010	T	C	het	9	0.391304	upstream	OR4C3											rs74707805
chr11	48346017	CA	TG	het	2	0.0869565	upstream	OR4C3
chr11	48346067	T	-	het	1	0.0434783	upstream	OR4C3											rs35285370
chr11	48346076	G	C	het	4	0.173913	upstream	OR4C3											rs77782638
chr11	48346090	A	G	het	2	0.0869565	upstream	OR4C3											rs77339710
chr11	48346109	C	T	het	2	0.0869565	upstream	OR4C3											rs76660963
chr11	48346121	C	T	het	2	0.0869565	upstream	OR4C3											rs77107221
chr11	48346172	G	A	het	3	0.130435	upstream	OR4C3											rs76011857
chr11	48346182	G	A	het	4	0.173913	upstream	OR4C3											rs74806949
chr11	48346189	T	C	het	6	0.26087	upstream	OR4C3											rs78569433
chr11	48346204	T	A	het	10	0.434783	upstream	OR4C3											rs79598002
chr11	48346229	T	C	het	12	0.521739	upstream	OR4C3											rs61915355
chr11	48346280	A	T	het	13	0.565217	upstream	OR4C3											rs61915356
chr11	48346389	C	T	het	1	0.0434783	upstream	OR4C3											rs7949320
chr11	48346423	A	G	het	12	0.521739	upstream	OR4C3											rs75646016
chr11	48346427	T	C	het	12	0.521739	upstream	OR4C3											rs74892148
chr11	48346450	A	G	het	13	0.565217	upstream	OR4C3											rs79776366
chr11	48346458	A	G	het	12	0.521739	upstream	OR4C3											rs77295176																			ID=COSN163928,COSN163927;OCCURENCE=1(breast),1(NS)
chr11	48346513	T	C	het	11	0.478261	exonic	OR4C3	synonymous SNV	OR4C3:NM_001004702:exon1:c.21T>C:p.L7L									rs78206553
chr11	48346523	C	T	het	9	0.391304	exonic	OR4C3	nonsynonymous SNV	OR4C3:NM_001004702:exon1:c.31C>T:p.L11F									rs72911451	0.01	0	0	3.09	0.254			1	0	0.478	0.024		5.707	0.188	0.338	0.071	2.092	12.95
chr11	48346535	G	C	het	9	0.391304	exonic	OR4C3	nonsynonymous SNV	OR4C3:NM_001004702:exon1:c.43G>C:p.G15R									rs76964780	0.07	0	0	3.18	4.64			1	0	0.941	0.036		12.652	1.363	0.455	0.245	3.272	16.98
chr11	48346541	A	T	het	9	0.391304	exonic	OR4C3	nonsynonymous SNV	OR4C3:NM_001004702:exon1:c.49A>T:p.T17S									rs75498992	0.46	0	0	3.21	-4.44			1	0	0.366	0.01		1.301	-0.518	-0.314	0.041	2.604	14.67	ID=COSM147192;OCCURENCE=1(stomach)
chr11	48346547	C	T	het	9	0.391304	exonic	OR4C3	nonsynonymous SNV	OR4C3:NM_001004702:exon1:c.55C>T:p.P19S									rs79042268	1	0	0	3.25	-5.18			1	0	0.066	0.007		4.599	-0.536	-1.054	0.049	2.076	12.9
chr11	48346551	C	A	het	9	0.391304	exonic	OR4C3	nonsynonymous SNV	OR4C3:NM_001004702:exon1:c.59C>A:p.A20E									rs77470587	0.07	0	0	3.16	1.53			1	0	0.835	0.019		1.785	0.718	-0.046	0.142	2.651	14.82
chr11	48346579	C	A	het	10	0.434783	exonic	OR4C3	nonsynonymous SNV	OR4C3:NM_001004702:exon1:c.87C>A:p.D29E									rs72911452	1	0	0.001	5.52	-5.3			1	-0.77	0.405	0.001		0.278	-0.82	-1.024	0.077	0.666	7.57
chr11	48346588	A	C	het	10	0.434783	exonic	OR4C3	nonsynonymous SNV	OR4C3:NM_001004702:exon1:c.96A>C:p.Q32H									rs75900655	0.19	0	0	7.32	-4.03			1	-0.895	0.048	0		5.755	-0.789	-1.465	0.073	2.599	14.65
chr11	48346604	T	G	het	10	0.434783	exonic	OR4C3	nonsynonymous SNV	OR4C3:NM_001004702:exon1:c.112T>G:p.F38V									rs75647397	0.5	0	0	6.67	2.02			1	-0.98	0.003	0.001		5.387	0.466	-0.009	0.454	0.448	6.431
chr11	48346615	G	A	het	11	0.478261	exonic	OR4C3	synonymous SNV	OR4C3:NM_001004702:exon1:c.123G>A:p.G41G									rs73463988
chr11	48346661	TTGCTGATC	-	het	1	0.0434783	exonic	OR4C3	nonframeshift deletion	OR4C3:NM_001004702:exon1:c.169_177del:p.57_59del									rs138704181																			ID=COSM1163639;OCCURENCE=2(pancreas),1(large_intestine)
chr11	48346681	G	A	het	7	0.304348	exonic	OR4C3	synonymous SNV	OR4C3:NM_001004702:exon1:c.189G>A:p.T63T									rs78490540
chr11	48346729	G	C	het	11	0.478261	exonic	OR4C3	synonymous SNV	OR4C3:NM_001004702:exon1:c.237G>C:p.T79T									rs73463990
chr11	48346791	C	T	het	11	0.478261	exonic	OR4C3	nonsynonymous SNV	OR4C3:NM_001004702:exon1:c.299C>T:p.S100F									rs73463994	0	0.007	0.044	4.02	5.88			0.994	2.325	0	0		17.887	2.829	2.146	0.762	1.821	12.05
chr11	48346822	A	C	het	12	0.521739	exonic	OR4C3	synonymous SNV	OR4C3:NM_001004702:exon1:c.330A>C:p.S110S									rs73463997
chr11	48346843	C	T	het	12	0.521739	exonic	OR4C3	synonymous SNV	OR4C3:NM_001004702:exon1:c.351C>T:p.I117I									rs73463998
chr11	48346916	G	C	het	17	0.73913	exonic	OR4C3	nonsynonymous SNV	OR4C3:NM_001004702:exon1:c.424G>C:p.V142L									rs77069283	0.18	0.001	0.012	3.49	4.87			1	1.525	0.006	0.02		12.531	1.493	1.564	0.663	1.913	12.35	ID=COSM1180649;OCCURENCE=1(upper_aerodigestive_tract)
chr11	48346924	T	C	het	16	0.695652	exonic	OR4C3	synonymous SNV	OR4C3:NM_001004702:exon1:c.432T>C:p.A144A									rs72911454
chr11	48346932	G	A	het	16	0.695652	exonic	OR4C3	nonsynonymous SNV	OR4C3:NM_001004702:exon1:c.440G>A:p.R147H	0.0068	0.0014				0.0041			rs80285195	0.03	0.007	0.013	-1.1	5.78			0.999	3.42	0.002	0.547		17.68	2.782	6.507	0.359	3.598	18.32
chr11	48346961	AA	TG	het	8	0.347826	exonic	OR4C3	nonframeshift substitution	OR4C3:NM_001004702:exon1:c.469_470TG
chr11	48346999	T	G	het	13	0.565217	exonic	OR4C3	synonymous SNV	OR4C3:NM_001004702:exon1:c.507T>G:p.L169L									rs72473367
chr11	48347014	G	A	het	14	0.608696	exonic	OR4C3	stopgain	OR4C3:NM_001004702:exon1:c.522G>A:p.W174X									rs72473368	1	0	0	0	5.78			1	0	0	0	4.66732	17.68	2.782	1.461	0	4.667	25.7
chr11	48347023	C	T	het	12	0.521739	exonic	OR4C3	synonymous SNV	OR4C3:NM_001004702:exon1:c.531C>T:p.G177G									rs67077733
chr11	48347067	C	T	het	12	0.521739	exonic	OR4C3	nonsynonymous SNV	OR4C3:NM_001004702:exon1:c.575C>T:p.P192L									rs73464001	0	1	0.998	8.65	5.78			0.997	2.51	0	0		17.68	2.782	2.481	0.764	3.68	18.7
chr11	48347100	C	T	het	13	0.565217	exonic	OR4C3	nonsynonymous SNV	OR4C3:NM_001004702:exon1:c.608C>T:p.A203V									rs73465905	0.27	0	0.001	8.83	4.63			1	-0.04	0.006	0		10.066	1.045	0.788	0.096	1.373	10.52
chr11	48347124	A	G	het	13	0.565217	exonic	OR4C3	nonsynonymous SNV	OR4C3:NM_001004702:exon1:c.632A>G:p.E211G									rs79019124	0.07	0	0.001	8.62	4.65			0.954	1.6	0.002	0.001		10.016	1.046	1.362	0.4	2.266	13.54
chr11	48347130	C	G	het	14	0.608696	exonic	OR4C3	nonsynonymous SNV	OR4C3:NM_001004702:exon1:c.638C>G:p.A213G									rs77395846	0.01	0.004	0.013	8.49	4.88			0.895	3.75	0.002	0.001		12.57	1.494	1.443	0.567	2.416	14.04
chr11	48347142	C	T	het	15	0.652174	exonic	OR4C3	nonsynonymous SNV	OR4C3:NM_001004702:exon1:c.650C>T:p.T217M									rs79891698	0	0.508	0.512	8.39	5.88			0.98	3.345	0	0.002		17.887	2.829	1.152	0.653	2.604	14.67	ID=COSM147193;OCCURENCE=1(stomach)	CLINSIG=untested;CLNDBN=Malignant_melanoma;CLNREVSTAT=not;CLNACC=RCV000069396.2;CLNDSDB=MedGen:SNOMED_CT;CLNDSDBID=C0025202:2092003
chr11	48347144	T	C	het	15	0.652174	exonic	OR4C3	nonsynonymous SNV	OR4C3:NM_001004702:exon1:c.652T>C:p.Y218H									rs79124801	0.65	0	0.002	8.59	1.15			1	0.035	0.039	0		8.657	0.516	-2.069	0.185	-2.428	0.003	ID=COSM147194;OCCURENCE=1(stomach)	CLINSIG=untested;CLNDBN=Malignant_melanoma;CLNREVSTAT=not;CLNACC=RCV000069397.2;CLNDSDB=MedGen:SNOMED_CT;CLNDSDBID=C0025202:2092003
chr11	48347267	T	C	het	12	0.521739	exonic	OR4C3	nonsynonymous SNV	OR4C3:NM_001004702:exon1:c.775T>C:p.C259R									rs73465910	1	0	0.001	8.86	0.562			1	-1.76	0.014	0		3.886	0.113	-2.01	0.076	-1.815	0.009
chr11	48347306	G	T	het	12	0.521739	exonic	OR4C3	nonsynonymous SNV	OR4C3:NM_001004702:exon1:c.814G>T:p.V272F									rs73465911	0	0.175	0.41	7.93	5.97			0.803	3.42	0	0.003		17.928	2.838	1.881	0.84	2.192	13.29
chr11	48347342	G	A	het	14	0.608696	exonic	OR4C3	nonsynonymous SNV	OR4C3:NM_001004702:exon1:c.850G>A:p.V284M									rs76958755	1	0	0.004	1.13	0.926			1	0.86	0.056	0.046		1.511	0.156	-2.482	0.141	-2.509	0.003
chr11	48347346	A	T	het	14	0.608696	exonic	OR4C3	nonsynonymous SNV	OR4C3:NM_001004702:exon1:c.854A>T:p.H285L									rs74590631	0	0	0.001	1.29	4.04			1	-0.495	0.031	0.04		9.202	0.778	0.147	0.402	0.917	8.734
chr11	48347358	C	T	het	14	0.608696	exonic	OR4C3	nonsynonymous SNV	OR4C3:NM_001004702:exon1:c.866C>T:p.T289I									rs76274696	0.04	0.004	0.061	1.27	4.08			1	1.385	0.002	0.075		7.475	1.512	-0.841	0.609	0.793	8.175
chr11	48347363	C	T	het	14	0.608696	exonic	OR4C3	nonsynonymous SNV	OR4C3:NM_001004702:exon1:c.871C>T:p.P291S									rs77814753	0.43	0	0.019	8.91	-7.42			1	0.395	0.071	0		14.252	-1.392	-4.844	0.139	-1.234	0.057
chr11	48347392	T	C	het	15	0.652174	exonic	OR4C3	synonymous SNV	OR4C3:NM_001004702:exon1:c.900T>C:p.Y300Y									rs79127479
chr11	48347419	A	G	het	15	0.652174	exonic	OR4C3	synonymous SNV	OR4C3:NM_001004702:exon1:c.927A>G:p.P309P									rs73465913
chr11	48347492	G	A	het	14	0.608696	downstream	OR4C3											rs79775762
chr11	48347498	A	T	het	14	0.608696	downstream	OR4C3											rs78309417
chr11	48347539	G	A	het	13	0.565217	downstream	OR4C3											rs79172951
chr11	48347564	T	-	het	1	0.0434783	downstream	OR4C3											rs68062129
chr11	48347583	G	A	het	12	0.521739	downstream	OR4C3											rs78209927
chr11	48347604	A	T	het	2	0.0869565	downstream	OR4C3											rs76365983
chr11	48347839	C	T	het	1	0.0434783	downstream	OR4C3											rs76793270
chr11	48347877	A	G	het	1	0.0434783	downstream	OR4C3											rs76717280
chr11	48347982	A	G	het	10	0.434783	downstream	OR4C3											rs73465917
chr11	48348053	A	G	het	11	0.478261	downstream	OR4C3											rs75593956
chr11	48348057	G	A	het	10	0.434783	downstream	OR4C3											rs75281613
chr11	48348076	T	C	het	11	0.478261	downstream	OR4C3											rs74951256
chr11	48348088	G	A	het	12	0.521739	downstream	OR4C3											rs76942287
chr11	48348091	A	C	het	12	0.521739	downstream	OR4C3											rs80343342
chr11	48348204	C	T	het	14	0.608696	downstream	OR4C3											rs73465919
chr11	48348241	C	T	het	13	0.565217	downstream	OR4C3											rs76891830
chr11	48348247	T	C	het	12	0.521739	downstream	OR4C3											rs72911462
chr11	48348259	G	C	het	14	0.608696	downstream	OR4C3											rs72911464
chr11	48348281	G	C	het	13	0.565217	downstream	OR4C3											rs74550558
chr11	48348286	AT	TC	het	5	0.217391	downstream	OR4C3
chr11	48348373	C	A	het	6	0.26087	downstream	OR4C3											rs4258379
chr11	48348403	A	G	het	1	0.0434783	downstream	OR4C3											rs370938703
chr11	55605874	-	T	het	1	0.0434783	upstream	OR5D16
chr11	55607414	T	G	het	1	0.0434783	downstream	OR5D16				0.0058		0.003					rs190986284
chr11	55635360	C	G	het	2	0.0869565	intergenic	OR5D16,TRIM51											rs7101735
chr11	55640421	G	T	het	1	0.0434783	intergenic	OR5D16,TRIM51
chr11	55640608	-	CA	hom	1	0.0434783	intergenic	OR5D16,TRIM51
chr11	55648268	G	A	het	1	0.0434783	intergenic	OR5D16,TRIM51						0.001
chr11	56380592	-	AG	het	1	0.0434783	exonic	OR5M1	frameshift insertion	OR5M1:NM_001004740:exon1:c.386_387insCT:p.P129fs
chr11	76868455	C	G	het	1	0.0434783	splicing	MYO7A
chr11	76895772	GAGGCGGGGACACCAGGGCCT	-	het	1	0.0434783	exonic	MYO7A	nonframeshift deletion	MYO7A:NM_001127179:exon27:c.3515_3535del:p.1172_1179del
chr11	76908662	T	C	het	3	0.130435	splicing	MYO7A											rs11237114																				CLINSIG=non-pathogenic;CLNDBN=not_provided;CLNREVSTAT=single;CLNACC=RCV000127056.1;CLNDSDB=MedGen;CLNDSDBID=CN221809
chr11	76910631	G	A	het	1	0.0434783	exonic	MYO7A	synonymous SNV	MYO7A:NM_000260:exon35:c.4620G>A:p.A1540A	0.0008			0.002	0.001	0.0061			rs41298745																				CLINSIG=probable-non-pathogenic;CLNDBN=not_specified;CLNREVSTAT=single;CLNACC=RCV000036156.2;CLNDSDB=MedGen;CLNDSDBID=CN169374
chr11	76912557	G	A	het	1	0.0434783	exonic	MYO7A	synonymous SNV	MYO7A:NM_000260:exon36:c.4917G>A:p.T1639T,MYO7A:NM_001127180:exon36:c.4803G>A:p.T1601T								0.000118	rs367670696
chr11	76919468	A	C	het	1	0.0434783	splicing	MYO7A
chr11	112832341	C	-	hom	1	0.0434783	exonic;splicing	NCAM1;NCAM1	frameshift deletion	NCAM1:NM_000615:exon2:c.7delC:p.Q3fs,NCAM1:NM_001076682:exon2:c.7delC:p.Q3fs,NCAM1:NM_001242607:exon2:c.7delC:p.Q3fs,NCAM1:NM_001242608:exon2:c.7delC:p.Q3fs,NCAM1:NM_181351:exon2:c.7delC:p.Q3fs
chr11	112834138	T	G	het	1	0.0434783	ncRNA_exonic	LOC101928847
chr11	113075149	A	-	hom	1	0.0434783	exonic	NCAM1	frameshift deletion	NCAM1:NM_000615:exon4:c.269delA:p.D90fs,NCAM1:NM_001076682:exon4:c.269delA:p.D90fs,NCAM1:NM_001242607:exon4:c.269delA:p.D90fs,NCAM1:NM_001242608:exon4:c.269delA:p.D90fs,NCAM1:NM_181351:exon4:c.269delA:p.D90fs
chr11	113101958	G	A	het	1	0.0434783	exonic	NCAM1	nonsynonymous SNV	NCAM1:NM_001242607:exon11:c.1130G>A:p.G377E				0.0099		0.001			rs117219783
chr11	113150205	CACT	-	het	1	0.0434783	intergenic	NCAM1,TTC12			0.0091
chr11	118898435	AC	CA	het	1	0.0434783	exonic;splicing	SLC37A4;SLC37A4	frameshift substitution	SLC37A4:NM_001164280:exon4:c.528_528TG,SLC37A4:NM_001467:exon5:c.528_528TG,SLC37A4:NM_001164277:exon6:c.528_528TG,SLC37A4:NM_001164278:exon6:c.528_528TG,SLC37A4:NM_001164279:exon6:c.309_309TG
chr12	862923	C	T	het	2	0.0869565	exonic	WNK1	synonymous SNV	WNK1:NM_001184985:exon1:c.192C>T:p.D64D,WNK1:NM_014823:exon1:c.192C>T:p.D64D,WNK1:NM_018979:exon1:c.192C>T:p.D64D,WNK1:NM_213655:exon1:c.192C>T:p.D64D
chr12	974308	-	C	het	2	0.0869565	exonic	WNK1	frameshift insertion	WNK1:NM_213655:exon9:c.2173dupC:p.V724fs									rs141823469
chr12	974355	T	C	het	1	0.0434783	exonic	WNK1	nonsynonymous SNV	WNK1:NM_213655:exon9:c.2219T>C:p.L740P									rs72649847	0.22	0	0	2.49	5.39			1	0	0	0.066		15.689	2.167	3.816	0.296	1.764	11.86			605232
chr12	990911	GA	CG	het	2	0.0869565	exonic	WNK1	nonframeshift substitution	WNK1:NM_014823:exon11:c.2424_2425CG,WNK1:NM_001184985:exon13:c.3945_3946CG,WNK1:NM_018979:exon13:c.3165_3166CG,WNK1:NM_213655:exon13:c.3921_3922CG
chr12	1018502	-	T	het	1	0.0434783	UTR3	WNK1
chr12	8371448	G	A	het	1	0.0434783	intergenic	FAM66C,FAM90A1
chr12	8373987	C	-	het	1	0.0434783	UTR3	FAM90A1
chr12	8374502	G	A	het	2	0.0869565	exonic	FAM90A1	synonymous SNV	FAM90A1:NM_018088:exon7:c.1311C>T:p.P437P		0.0014		0.002		0.001		0.003298	rs148315042
chr12	8376074	-	T	het	1	0.0434783	exonic	FAM90A1	frameshift insertion	FAM90A1:NM_018088:exon6:c.402dupA:p.G135fs
chr12	8382049	A	G	het	3	0.130435	intergenic	FAM90A1,FAM86FP											rs28534951
chr12	11174327	C	T	het	1	0.0434783	exonic	TAS2R19	nonsynonymous SNV	TAS2R19:NM_176888:exon1:c.844G>A:p.G282R									rs72475481	0.07	0.886	0.521	1.43	2.95			1	1.99	0.032	0		7.415	1.662	-0.166	0.381	1.692	11.62	ID=COSM1180661;OCCURENCE=1(upper_aerodigestive_tract)		613961
chr12	11174372	C	G	het	2	0.0869565	exonic	TAS2R19	nonsynonymous SNV	TAS2R19:NM_176888:exon1:c.799G>C:p.V267L	0.0008								rs74772077	0.14	0	0.001	1.69	-5.91			1	0.16	0.412	0.028		1.211	-4.404	-8.492	0.138	-1.119	0.126			613961
chr12	11174380	C	T	het	2	0.0869565	exonic	TAS2R19	nonsynonymous SNV	TAS2R19:NM_176888:exon1:c.791G>A:p.C264Y									rs76970958	0.02	0.97	0.845	5.68	-1.22			1	2.82	0.545	0.011		5.596	-0.268	-0.37	0.343	1.097	9.476			613961
chr12	11174390	G	A	het	2	0.0869565	exonic	TAS2R19	nonsynonymous SNV	TAS2R19:NM_176888:exon1:c.781C>T:p.L261F									rs74992161	1	0.001	0.009	1.24	-5.38			1	0.03	0.028	0.033		1.033	-4.456	-8.802	0.101	-3.393	0.001			613961
chr12	11174397	T	A	het	1	0.0434783	exonic	TAS2R19	nonsynonymous SNV	TAS2R19:NM_176888:exon1:c.774A>T:p.K258N									rs76455106	0.3	0.009	0.034	5.67	0.123			1	1.68	0.296	0.003		2.07	0.225	-0.71	0.072	-0.315	2.503			613961
chr12	11174416	A	G	het	1	0.0434783	exonic	TAS2R19	nonsynonymous SNV	TAS2R19:NM_176888:exon1:c.755T>C:p.L252P									rs112900131	0.21	0	0.003	1.5	-5.36			1	0.19	0.076	0.033		0.509	-1.493	-1.993	0.153	-0.481	1.787			613961
chr12	11174466	G	A	het	1	0.0434783	exonic	TAS2R19	synonymous SNV	TAS2R19:NM_176888:exon1:c.705C>T:p.L235L									rs199592952
chr12	11174476	G	A	het	1	0.0434783	exonic	TAS2R19	nonsynonymous SNV	TAS2R19:NM_176888:exon1:c.695C>T:p.T232I									rs200081075	1	0	0.002	1.4	0.101			1	-1.475	0.341	0.018		5.843	-0.09	-0.199	0.075	-2.116	0.006			613961
chr12	11174753	G	-	het	1	0.0434783	exonic	TAS2R19	stopgain	TAS2R19:NM_176888:exon1:c.418delC:p.L140X
chr12	16430344	A	G	het	1	0.0434783	exonic	SLC15A5	synonymous SNV	SLC15A5:NM_001170798:exon1:c.276T>C:p.L92L	0.0076			0.004			0.006503	0.001572	rs140649176
chr12	42092434	-	A	het	1	0.0434783	intergenic	PDZRN4,GXYLT1
chr12	42325904	A	G	hom	1	0.0434783	intergenic	PDZRN4,GXYLT1
chr12	42481609	G	A	het	1	0.0434783	exonic	GXYLT1	synonymous SNV	GXYLT1:NM_001099650:exon7:c.1209C>T:p.A403A,GXYLT1:NM_173601:exon8:c.1302C>T:p.A434A									rs112245628
chr12	42481617	G	C	het	1	0.0434783	exonic	GXYLT1	nonsynonymous SNV	GXYLT1:NM_001099650:exon7:c.1201C>G:p.R401G,GXYLT1:NM_173601:exon8:c.1294C>G:p.R432G									rs75740340	0.34	0.11	0.081	0	2.75			1	0.895	0.421	0.072		7.811	1.214	0.908	0.436	-1.647	0.012			613321
chr12	42481627	A	G	het	1	0.0434783	exonic	GXYLT1	synonymous SNV	GXYLT1:NM_001099650:exon7:c.1191T>C:p.S397S,GXYLT1:NM_173601:exon8:c.1284T>C:p.S428S									rs78709072
chr12	42481688	T	A	het	1	0.0434783	exonic	GXYLT1	nonsynonymous SNV	GXYLT1:NM_001099650:exon7:c.1130A>T:p.K377I,GXYLT1:NM_173601:exon8:c.1223A>T:p.K408I									rs200436402	0.13	0.402	0.196	0	2.11			0.972	1.59	0	0.146		6.859	0.213	3.034	0.524	2.087	12.93	ID=COSM307300,COSM307299;OCCURENCE=2(liver)		613321
chr12	42538284	G	A	het	1	0.0434783	exonic	GXYLT1	synonymous SNV	GXYLT1:NM_001099650:exon1:c.165C>T:p.G55G,GXYLT1:NM_173601:exon1:c.165C>T:p.G55G
chr12	51721975	-	A	hom	1	0.0434783	downstream	CELA1
chr12	51740388	CTGG	-	het	5	0.217391	splicing	CELA1											rs57614420
chr12	51740393	CCATATCCAC	GCGCAGCATG	het	1	0.0434783	splicing	CELA1
chr12	55517274	-	TTC	het	3	0.130435	intergenic	NEUROD4,OR9K2											rs34255543
chr12	55517666	-	T	het	1	0.0434783	intergenic	NEUROD4,OR9K2
chr12	55517822	TG	CA	hom	1	0.0434783	intergenic	NEUROD4,OR9K2
chr12	55523105	-	C	het	1	0.0434783	upstream	OR9K2
chr12	55523954	G	A	het	1	0.0434783	exonic	OR9K2	synonymous SNV	OR9K2:NM_001005243:exon1:c.402G>A:p.V134V	0.0023			0.001			0.000454	0.000116	rs139105553
chr12	55524935	C	T	het	1	0.0434783	downstream	OR9K2
chr12	55552940	-	T	het	1	0.0434783	intergenic	OR9K2,OR10A7
chr12	55553504	A	-	het	1	0.0434783	intergenic	OR9K2,OR10A7
chr12	66765722	-	T	het	1	0.0434783	splicing	GRIP1
chr12	66773158	T	-	het	1	0.0434783	exonic	GRIP1	frameshift deletion	GRIP1:NM_001178074:exon19:c.2367delA:p.K789fs,GRIP1:NM_021150:exon19:c.2367delA:p.K789fs
chr12	66786171	A	C	het	4	0.173913	exonic	GRIP1	nonsynonymous SNV	GRIP1:NM_001178074:exon18:c.2225T>G:p.M742R,GRIP1:NM_021150:exon18:c.2225T>G:p.M742R		0.0014		0.006			0.000246	0.001434	rs144494437	0	0	0.001	-1.09	-2.08			1	-0.46	0.147	0.108		10.093	-0.433	1.326	0.668	-0.483	1.778			604597
chr12	66957841	C	G	het	2	0.0869565	intronic	GRIP1			0.0008	0.0058		0.005		0.001			rs140255023
chr12	66957859	C	T	het	1	0.0434783	intronic	GRIP1
chr12	66957879	T	-	het	1	0.0434783	intronic	GRIP1
chr12	66990718	-	T	het	1	0.0434783	splicing	GRIP1
chr12	67072909	-	C	het	1	0.0434783	UTR5	GRIP1
chr12	67480742	T	A	het	1	0.0434783	ncRNA_intronic	LOC102724421				0.0029				0.002			rs190840653
chr12	67659885	C	T	het	2	0.0869565	intergenic	LOC102724421,CAND1						0.001					rs143183080
chr12	80839308	C	T	het	1	0.0434783	exonic	PTPRQ	synonymous SNV	PTPRQ:NM_001145026:exon3:c.201C>T:p.V67V	0.0098			0.001			0.007225		rs187435968
chr12	80856200	C	T	het	1	0.0434783	intronic	PTPRQ											rs113845933	0.71	0	0	1.33	0			1	0	0	0.042		0	0.064	0.076	0.056	-0.634	1.196			603317
chr12	80935453	T	C	het	1	0.0434783	exonic	PTPRQ	synonymous SNV	PTPRQ:NM_001145026:exon18:c.2758T>C:p.L920L
chr12	80935915	A	G	het	1	0.0434783	exonic	PTPRQ	nonsynonymous SNV	PTPRQ:NM_001145026:exon19:c.2977A>G:p.T993A	0.0015						0.002168		rs199812877	0.13	0.843	0.388	0.09	4.3			0.951	0	0	0.151		6.286	0.881	3.73	0.337	1.46	10.82			603317
chr12	80935999	-	A	het	1	0.0434783	exonic	PTPRQ	frameshift insertion	PTPRQ:NM_001145026:exon19:c.3062dupA:p.E1021fs
chr12	80982232	-	C	het	1	0.0434783	splicing	PTPRQ
chr12	81062853	G	T	het	1	0.0434783	exonic	PTPRQ	nonsynonymous SNV	PTPRQ:NM_001145026:exon37:c.5744G>T:p.W1915L										0	1	0.999	-2.97	5.63			1	0	0	0.886	4.77266	19.666	2.653	9.414	0.889	4.773	26.8			603317
chr12	92818561	-	A	het	1	0.0434783	exonic	CLLU1	frameshift insertion	CLLU1:NM_001025233:exon1:c.105_106insA:p.E35fs
chr12	92818668	T	-	het	1	0.0434783	exonic	CLLU1	frameshift deletion	CLLU1:NM_001025233:exon1:c.212delT:p.I71fs	0.0091	0.0014					0.008562	0.000514
chr12	92878443	T	-	het	1	0.0434783	intergenic	CLLU1,C12orf74
chr12	92878619	G	T	het	1	0.0434783	intergenic	CLLU1,C12orf74
chr12	92878761	G	A	het	1	0.0434783	intergenic	CLLU1,C12orf74
chr12	92878767	T	A	het	1	0.0434783	intergenic	CLLU1,C12orf74
chr12	92878834	T	-	het	1	0.0434783	intergenic	CLLU1,C12orf74
chr12	92879308	-	C	het	1	0.0434783	intergenic	CLLU1,C12orf74
chr12	92880036	-	A	het	1	0.0434783	intergenic	CLLU1,C12orf74
chr12	92880456	-	A	het	1	0.0434783	intergenic	CLLU1,C12orf74
chr12	92881104	-	A	het	1	0.0434783	intergenic	CLLU1,C12orf74
chr12	92882089	CA	TG	het	1	0.0434783	intergenic	CLLU1,C12orf74
chr12	92884287	A	-	het	1	0.0434783	intergenic	CLLU1,C12orf74
chr12	92884536	A	T	het	1	0.0434783	intergenic	CLLU1,C12orf74
chr12	92884698	-	T	het	1	0.0434783	intergenic	CLLU1,C12orf74
chr12	133692329	T	G	het	1	0.0434783	intergenic	ZNF140,ZNF891
chr12	133697082	G	-	het	1	0.0434783	exonic	ZNF891	frameshift deletion	ZNF891:NM_001277291:exon2:c.1423delC:p.L475fs
chr12	133697091	C	-	het	1	0.0434783	exonic	ZNF891	frameshift deletion	ZNF891:NM_001277291:exon2:c.1414delG:p.V472fs
chr12	133697130	CA	GG	hom	5	0.217391	exonic	ZNF891	nonframeshift substitution	ZNF891:NM_001277291:exon2:c.1374_1375CC
chr12	133697895	-	T	het	1	0.0434783	exonic	ZNF891	frameshift insertion	ZNF891:NM_001277291:exon2:c.609dupA:p.L204fs
chr12	133698377	A	G	het	1	0.0434783	exonic	ZNF891	nonsynonymous SNV	ZNF891:NM_001277291:exon2:c.128T>C:p.M43T		0.0029		0.0099		0.0082			rs11147241	0	0	0	4.67	4.05			0	0	0	0.01		11.028	1.687	1.448	0.226	0.991	9.046
chr12	133698795	G	A	het	1	0.0434783	intronic	ZNF891
chr13	25670554	-	AT	het	1	0.0434783	exonic	PABPC3	frameshift insertion	PABPC3:NM_030979:exon1:c.218_219insAT:p.N73fs
chr13	25670988	T	G	het	1	0.0434783	exonic	PABPC3	nonsynonymous SNV	PABPC3:NM_030979:exon1:c.652T>G:p.L218V	0.0098	0.0086		0.002	0.002	0.0051			rs2461	0.48	0.027	0.041	-2	0.993			0.691	-0.255	0.004	0.232		2.894	0.692	0.559	0.268	0.015	4.09
chr13	25671008	C	T	het	1	0.0434783	exonic	PABPC3	synonymous SNV	PABPC3:NM_030979:exon1:c.672C>T:p.T224T									rs76447065
chr13	25671027	A	G	het	1	0.0434783	exonic	PABPC3	nonsynonymous SNV	PABPC3:NM_030979:exon1:c.691A>G:p.K231E									rs78826513	0	0.995	0.953	3.05	0.993			0.669	3.095	0	0.066		6.117	0.692	2.374	0.403	2.631	14.76
chr13	25671080	A	G	het	2	0.0869565	exonic	PABPC3	synonymous SNV	PABPC3:NM_030979:exon1:c.744A>G:p.V248V									rs76241879
chr13	25671089	G	T	het	1	0.0434783	exonic	PABPC3	nonsynonymous SNV	PABPC3:NM_030979:exon1:c.753G>T:p.M251I									rs75281454	0.02	0.589	0.564	2.27	0.875			1	2.315	0	0.066		7.549	0.759	6.59	0.419	1.415	10.67
chr13	25671168	C	T	het	1	0.0434783	exonic	PABPC3	nonsynonymous SNV	PABPC3:NM_030979:exon1:c.832C>T:p.R278C									rs78552667	0	0.358	0.082	3.29	-0.194			1	3.46	0	0.028		5.143	-0.094	3.74	0.311	1.7	11.64
chr13	25671172	C	A	het	1	0.0434783	exonic	PABPC3	nonsynonymous SNV	PABPC3:NM_030979:exon1:c.836C>A:p.T279K									rs79593984	1	0	0	1.79	-0.613			1	-3.005	0.004	0.007		5.01	-0.179	2.767	0.244	-1.624	0.013
chr13	25671195	A	G	het	2	0.0869565	exonic	PABPC3	nonsynonymous SNV	PABPC3:NM_030979:exon1:c.859A>G:p.R287G									rs201411821	0	0.399	0.15	1.5	0.875			0.998	3.2	0	0.093		3.684	0.632	2.714	0.346	1.362	10.48	ID=COSM1366069;OCCURENCE=3(large_intestine)
chr13	25671200	C	T	het	3	0.130435	exonic	PABPC3	synonymous SNV	PABPC3:NM_030979:exon1:c.864C>T:p.I288I									rs76111404
chr13	25671206	A	G	het	3	0.130435	exonic	PABPC3	synonymous SNV	PABPC3:NM_030979:exon1:c.870A>G:p.R290R									rs76614854
chr13	25671210	C	T	het	3	0.130435	exonic	PABPC3	stopgain	PABPC3:NM_030979:exon1:c.874C>T:p.Q292X									rs80062522	0.05	0	0	0	0.875			1	0	0	0	5.44381	7.549	0.759	5.304	0	5.444	35
chr13	25671214	T	G	het	3	0.130435	exonic	PABPC3	nonsynonymous SNV	PABPC3:NM_030979:exon1:c.878T>G:p.V293G									rs201081849	1	0	0	3.5	-1.75			0.972	-3.775	0.006	0.002		3.275	-1.432	3.852	0.451	-2.715	0
chr13	25671271	A	G	het	6	0.26087	exonic	PABPC3	nonsynonymous SNV	PABPC3:NM_030979:exon1:c.935A>G:p.K312R									rs79246694	0.06	0.383	0.344	2.34	0.875			1	0.17	0	0.026		5.899	0.632	6.256	0.327	0.814	8.276
chr13	25671274	C	T	het	6	0.26087	exonic	PABPC3	nonsynonymous SNV	PABPC3:NM_030979:exon1:c.938C>T:p.A313V	0.0008	0.0014							rs76994938	0.16	0.039	0.018	2.39	-1.75			0.934	0.355	0.047	0.019		5.005	-0.235	4.52	0.332	0.33	5.79
chr13	25671292	C	T	het	8	0.347826	exonic	PABPC3	nonsynonymous SNV	PABPC3:NM_030979:exon1:c.956C>T:p.T319I									rs80261016	0	0.726	0.45	2.36	0.875			1	0.935	0	0.034		7.549	0.759	5.304	0.409	3.079	16.28
chr13	25671311	TATGA	-	het	2	0.0869565	exonic	PABPC3	frameshift deletion	PABPC3:NM_030979:exon1:c.975_979del:p.V325fs									rs371130768
chr13	25671320	A	G	het	3	0.130435	exonic	PABPC3	synonymous SNV	PABPC3:NM_030979:exon1:c.984A>G:p.E328E
chr13	25671333	A	-	het	2	0.0869565	exonic	PABPC3	frameshift deletion	PABPC3:NM_030979:exon1:c.997delA:p.K333fs									rs371570689																			ID=COSM111561;OCCURENCE=1(ovary),2(NS)
chr13	25671369	G	T	het	7	0.304348	exonic	PABPC3	stopgain	PABPC3:NM_030979:exon1:c.1033G>T:p.E345X									rs76804900	0	0	0	0	0.875			1	0	0	0	6.69474	7.549	0.759	6.589	0	6.695	38
chr13	25671398	C	T	het	5	0.217391	exonic	PABPC3	synonymous SNV	PABPC3:NM_030979:exon1:c.1062C>T:p.N354N									rs77306665
chr13	25671429	G	T	het	1	0.0434783	exonic	PABPC3	nonsynonymous SNV	PABPC3:NM_030979:exon1:c.1093G>T:p.V365L									rs77466429	0	0.987	0.945	3.06	1.41			1	2.055	0.001	0.049		8.307	0.759	6.589	0.669	3.605	18.35	ID=COSM1286943;OCCURENCE=1(autonomic_ganglia)
chr13	25671451	A	G	het	1	0.0434783	exonic	PABPC3	nonsynonymous SNV	PABPC3:NM_030979:exon1:c.1115A>G:p.E372G										0	1	0.981	3.35	1.41			1	3.245	0.007	0.061		6.532	0.632	6.256	0.349	2.913	15.71
chr13	25671456	C	T	het	1	0.0434783	exonic	PABPC3	nonsynonymous SNV	PABPC3:NM_030979:exon1:c.1120C>T:p.R374C										0	0.999	0.859	3.24	1.41			1	2.305	0.006	0.048		8.307	0.759	5.304	0.406	2.662	14.86	ID=COSM1219089;OCCURENCE=1(large_intestine)
chr13	25672056	G	A	het	1	0.0434783	exonic	PABPC3	nonsynonymous SNV	PABPC3:NM_030979:exon1:c.1720G>A:p.G574R										0.01	0.999	0.995	0.65	0.875			1	3.785	0	0.35		7.549	0.759	4.759	0.317	2.429	14.08
chr13	25672058	G	T	het	1	0.0434783	exonic	PABPC3	synonymous SNV	PABPC3:NM_030979:exon1:c.1722G>T:p.G574G																												ID=COSM696900;OCCURENCE=1(lung)
chr13	25672073	G	A	het	1	0.0434783	exonic	PABPC3	nonsynonymous SNV	PABPC3:NM_030979:exon1:c.1737G>A:p.M579I										0	0.968	0.975	0.33	0.875			1	3.23	0	0.386		7.549	0.759	4.899	0.405	2.885	15.61
chr13	25672098	C	G	het	1	0.0434783	exonic	PABPC3	nonsynonymous SNV	PABPC3:NM_030979:exon1:c.1762C>G:p.L588V										0.23	0.372	0.532	0.74	0.875			0.997	1.445	0.001	0.142		7.549	0.759	1.487	0.191	1.867	12.2
chr13	25672104	T	C	het	2	0.0869565	exonic	PABPC3	nonsynonymous SNV	PABPC3:NM_030979:exon1:c.1768T>C:p.Y590H										1	0	0	1.15	-0.073			0.999	-2.535	0.005	0.012		5.349	-0.069	2.792	0.045	-0.861	0.525	ID=COSM1194499;OCCURENCE=1(lung)
chr13	25672111	T	C	het	2	0.0869565	exonic	PABPC3	nonsynonymous SNV	PABPC3:NM_030979:exon1:c.1775T>C:p.L592P										0	0.999	0.978	-0.13	0.875			1	3.505	0.001	0.452		5.899	0.632	2.922	0.649	2.967	15.89
chr13	25672126	C	T	het	1	0.0434783	exonic	PABPC3	nonsynonymous SNV	PABPC3:NM_030979:exon1:c.1790C>T:p.S597L										0.32	0.349	0.645	1.13	0.875			1	1.055	0	0.117		7.549	0.759	3.666	0.168	2.49	14.29
chr13	25672135	C	A	het	1	0.0434783	exonic	PABPC3	nonsynonymous SNV	PABPC3:NM_030979:exon1:c.1799C>A:p.S600Y										0	0.514	0.228	0.81	0.875			1	2.88	0	0.156		7.549	0.759	3.736	0.262	2.564	14.53
chr13	25672139	G	A	het	1	0.0434783	exonic	PABPC3	synonymous SNV	PABPC3:NM_030979:exon1:c.1803G>A:p.K601K
chr13	25672158	G	A	het	1	0.0434783	exonic	PABPC3	nonsynonymous SNV	PABPC3:NM_030979:exon1:c.1822G>A:p.V608I										0	0.909	0.863	0.32	0.875			0.999	2.54	0.001	0.304	4.26055	7.549	0.759	2.278	0.186	4.261	22.2
chr13	25672572	A	T	het	1	0.0434783	UTR3	PABPC3
chr13	25672710	G	A	het	1	0.0434783	downstream	PABPC3
chr13	25672805	-	AT	het	1	0.0434783	downstream	PABPC3
chr13	113978351	A	-	het	1	0.0434783	downstream	GRTP1,LAMP1
chr13	114006133	C	-	het	1	0.0434783	ncRNA_exonic	GRTP1-AS1
chr13	114010124	AG	-	het	1	0.0434783	ncRNA_exonic	GRTP1-AS1
chr13	114010125	G	-	het	1	0.0434783	ncRNA_exonic	GRTP1-AS1
chr13	114018368	-	G	het	1	0.0434783	UTR5	GRTP1
chr13	114019047	-	C	het	1	0.0434783	upstream	GRTP1
chr13	114058340	G	A	het	2	0.0869565	exonic	LOC101928841	nonsynonymous SNV	LOC101928841:NM_001304433:exon2:c.4165C>T:p.R1389W									rs112625345
chr13	114058587	C	T	het	1	0.0434783	exonic	LOC101928841	synonymous SNV	LOC101928841:NM_001304433:exon2:c.3918G>A:p.K1306K									rs370617755
chr13	114058884	T	-	het	1	0.0434783	exonic	LOC101928841	frameshift deletion	LOC101928841:NM_001304433:exon2:c.3621delA:p.P1207fs
chr13	114059234	-	C	het	1	0.0434783	exonic	LOC101928841	frameshift insertion	LOC101928841:NM_001304433:exon2:c.3270dupG:p.R1091fs
chr13	114059512	G	A	het	1	0.0434783	exonic	LOC101928841	nonsynonymous SNV	LOC101928841:NM_001304433:exon2:c.2993C>T:p.T998M				0.002
chr13	114060985	C	G	het	2	0.0869565	exonic	LOC101928841	nonsynonymous SNV	LOC101928841:NM_001304433:exon2:c.1520G>C:p.C507S									rs202213702
chr14	20512825	CC	TA	het	1	0.0434783	intergenic	OR4K13,OR4L1
chr14	20527359	G	A	het	2	0.0869565	upstream	OR4L1
chr14	20527694	CT	TG	het	1	0.0434783	upstream	OR4L1
chr14	20527697	TT	GC	het	1	0.0434783	upstream	OR4L1
chr14	20527699	TG	CT	het	1	0.0434783	upstream	OR4L1
chr14	20527700	G	C	het	1	0.0434783	upstream	OR4L1
chr14	20529341	TA	-	het	1	0.0434783	downstream	OR4L1											rs4060085
chr14	20529342	A	-	het	1	0.0434783	downstream	OR4L1
chr14	20561943	-	G	het	1	0.0434783	intergenic	OR4L1,OR4K17
chr14	20562401	C	G	het	6	0.26087	intergenic	OR4L1,OR4K17											rs969775
chr14	99183489	-	A	het	1	0.0434783	exonic	C14orf177	frameshift insertion	C14orf177:NM_182560:exon4:c.257dupA:p.E86fs
chr15	23686062	T	C	het	2	0.0869565	exonic	GOLGA6L2	nonsynonymous SNV	GOLGA6L2:NM_001304388:exon8:c.1560A>G:p.I520M									rs202194865	0.12	0.126	0.016	2.88	0			1	0	0	0.079		0	0.402	0.306	0.103	-0.203	3.015
chr16	855463	-	C	het	1	0.0434783	exonic	PRR25	frameshift insertion	PRR25:NM_001013638:exon1:c.22dupC:p.K7fs
chr16	864093	C	-	het	1	0.0434783	downstream	PRR25
chr16	864524	T	A	het	1	0.0434783	downstream	PRR25											rs201533496
chr16	1305580	G	A	het	2	0.0869565	upstream	TPSD1											rs12185152
chr16	1305621	C	T	het	6	0.26087	upstream	TPSD1											rs12185155
chr16	1305783	C	T	het	6	0.26087	upstream	TPSD1											rs111306730
chr16	1305813	C	T	het	3	0.130435	upstream	TPSD1
chr16	1305826	G	C	het	8	0.347826	upstream	TPSD1											rs28551132
chr16	1305831	CAG	TGA	het	2	0.0869565	upstream	TPSD1
chr16	1305943	T	C	het	1	0.0434783	upstream	TPSD1											rs3874640
chr16	1306265	-	C	het	1	0.0434783	upstream	TPSD1
chr16	1306559	AG	GA	het	1	0.0434783	exonic	TPSD1	nonframeshift substitution	TPSD1:NM_012217:exon2:c.125_126GA
chr16	1306665	A	G	het	1	0.0434783	exonic	TPSD1	synonymous SNV	TPSD1:NM_012217:exon2:c.231A>G:p.L77L									rs3993988
chr16	1306873	G	A	het	3	0.130435	exonic	TPSD1	synonymous SNV	TPSD1:NM_012217:exon3:c.330G>A:p.P110P									rs113333718
chr16	1306918	C	T	het	7	0.304348	exonic	TPSD1	synonymous SNV	TPSD1:NM_012217:exon3:c.375C>T:p.T125T									rs74470113																			ID=COSM122114;OCCURENCE=1(upper_aerodigestive_tract)	CLINSIG=untested;CLNDBN=Malignant_melanoma;CLNREVSTAT=not;CLNACC=RCV000070988.2;CLNDSDB=MedGen:SNOMED_CT;CLNDSDBID=C0025202:2092003
chr16	1306921	G	A	het	7	0.304348	exonic	TPSD1	synonymous SNV	TPSD1:NM_012217:exon3:c.378G>A:p.G126G									rs78324915																			ID=COSM148002;OCCURENCE=1(stomach),1(haematopoietic_and_lymphoid_tissue)
chr16	1306923	C	T	het	2	0.0869565	exonic	TPSD1	nonsynonymous SNV	TPSD1:NM_012217:exon3:c.380C>T:p.A127V									rs143993373	0.01	1	0.908	-1.52	1.42			1	1.59	0.776	0.44		4.431	1.408	-0.065	0.426	2.679	14.92			609272
chr16	1306927	C	T	het	8	0.347826	exonic	TPSD1	synonymous SNV	TPSD1:NM_012217:exon3:c.384C>T:p.D128D									rs79472859																			ID=COSM148003;OCCURENCE=1(stomach)
chr16	1306971	A	G	het	6	0.26087	exonic	TPSD1	nonsynonymous SNV	TPSD1:NM_012217:exon3:c.428A>G:p.H143R									rs72775466	0.28	0.003	0.011	-1.48	1.26			1	0.555	0.147	0.296		5.912	1.156	-0.594	0.245	-2.042	0.006	ID=COSM1579266;OCCURENCE=1(NS)		609272
chr16	1306973	A	G	het	6	0.26087	exonic	TPSD1	nonsynonymous SNV	TPSD1:NM_012217:exon3:c.430A>G:p.I144V									rs79313952	1	0.001	0.009	-2.02	-5.1			1	-0.29	0.585	0		0.099	-1.132	-1.101	0.206	-2.883	0.001	ID=COSM1579263;OCCURENCE=1(NS)		609272
chr16	1306986	C	T	het	3	0.130435	exonic	TPSD1	nonsynonymous SNV	TPSD1:NM_012217:exon3:c.443C>T:p.T148M									rs72775467	0.07	0.665	0.144	-1.52	1.57			1	1.545	0.784	0		3.811	0.384	0.429	0.354	0.026	4.148	ID=COSM1579273;OCCURENCE=1(NS)		609272
chr16	1312836	C	T	het	1	0.0434783	intergenic	TPSD1,UBE2I												1	0	0	0	2.42			0	0	0.077	0		10.95	1.684	4.08	0	-0.34	2.39
chr16	1313382	A	-	het	1	0.0434783	intergenic	TPSD1,UBE2I
chr16	1313775	C	G	het	1	0.0434783	intergenic	TPSD1,UBE2I
chr16	1330419	-	C	het	1	0.0434783	intergenic	TPSD1,UBE2I
chr16	1344566	-	G	het	1	0.0434783	intergenic	TPSD1,UBE2I
chr16	3594544	C	T	het	2	0.0869565	intronic	NLRC3						0.001		0.0041			rs145638801
chr16	3613874	C	G	het	1	0.0434783	exonic	NLRC3	nonsynonymous SNV	NLRC3:NM_178844:exon5:c.1064G>C:p.W355S										0.25	0.001	0.001	-1.6	2.06			1	0	0.834	0.35		7.963	0.165	0.071	0.396	-3.074	0.001			615648
chr16	19565994	T	A	het	1	0.0434783	upstream	C16orf62
chr16	19565996	A	T	het	1	0.0434783	upstream	C16orf62
chr16	19566172	-	T	het	1	0.0434783	upstream	C16orf62
chr16	19593030	T	C	het	1	0.0434783	intronic	C16orf62						0.0089					rs739640
chr16	19603092	-	T	het	1	0.0434783	splicing	C16orf62
chr16	19627470	C	A	het	1	0.0434783	exonic	C16orf62	nonsynonymous SNV	C16orf62:NM_020314:exon13:c.1325C>A:p.T442N										0	0	0	-0.14	2.42			1	0	0	0.095		9.208	0.683	3.75	0.281	1.662	11.52
chr16	22019027	A	G	het	1	0.0434783	upstream	C16orf52			0.0008			0.001
chr16	22094682	G	-	het	1	0.0434783	UTR3	C16orf52
chr16	81134418	-	A	het	1	0.0434783	downstream	PKD1L2
chr16	81134434	-	C	het	1	0.0434783	downstream	PKD1L2
chr16	81145940	G	T	het	1	0.0434783	exonic	PKD1L2	unknown	UNKNOWN
chr16	81174989	-	G	het	1	0.0434783	exonic	PKD1L2	unknown	UNKNOWN
chr16	81190708	A	G	het	1	0.0434783	splicing	PKD1L2
chr16	81193321	C	G	het	3	0.130435	exonic	PKD1L2	unknown	UNKNOWN
chr16	81193322	G	-	het	1	0.0434783	exonic	PKD1L2	unknown	UNKNOWN
chr16	81198260	C	T	het	1	0.0434783	exonic;splicing	PKD1L2;PKD1L2	unknown	UNKNOWN						0.002
chr16	81199554	CA	TG	het	1	0.0434783	exonic;splicing	PKD1L2;PKD1L2	unknown	UNKNOWN
chr16	81211531	-	G	het	1	0.0434783	exonic	PKD1L2	frameshift insertion	PKD1L2:NM_001278423:exon3:c.262dupC:p.R88fs,PKD1L2:NM_001076780:exon14:c.2317dupC:p.R773fs
chr16	81253668	C	T	het	1	0.0434783	splicing	PKD1L2						0.001			0.000748	0.002762	rs187742792
chr17	6557307	G	T	het	1	0.0434783	downstream	C17orf100
chr17	26729369	A	G	het	1	0.0434783	intronic	SLC46A1
chr17	26732420	A	G	het	2	0.0869565	exonic	SLC46A1	nonsynonymous SNV	SLC46A1:NM_001242366:exon2:c.295T>C:p.F99L,SLC46A1:NM_080669:exon2:c.295T>C:p.F99L	0.0008						0.001004	0.00012	rs201862124	0.74	0.333	0.193	0.57	5.38			1	0	0	0.107		15.344	2.168	3.749	0.434	2.928	15.76			611672
chr17	26733110	G	C	het	1	0.0434783	exonic	SLC46A1	nonsynonymous SNV	SLC46A1:NM_001242366:exon1:c.23C>G:p.P8R,SLC46A1:NM_080669:exon1:c.23C>G:p.P8R										0.54	0	0.002	1.57	0.01			1	0	0.144	0.042		7.212	0.262	-1.243	0.126	1.259	10.1			611672
chr17	26794833	-	A	het	1	0.0434783	intergenic	SLC46A1,SLC13A2
chr17	26794938	CT	TG	het	2	0.0869565	intergenic	SLC46A1,SLC13A2
chr17	39593368	A	T	het	2	0.0869565	UTR3	KRT38											rs372400324
chr17	39594525	C	T	het	1	0.0434783	exonic	KRT38	nonsynonymous SNV	KRT38:NM_006771:exon6:c.1061G>A:p.R354H		0.0029						0.001163	rs147616024	0.01	1	0.975	-2.66	4.63			0.91	2.92	0	0.858	4.76906	16.643	2.418	5.731	0.696	4.769	26.8			604542
chr17	39595484	G	A	het	4	0.173913	exonic	KRT38	stopgain	KRT38:NM_006771:exon3:c.703C>T:p.Q235X									rs148768443	0	0	0	0	1.01			1	0	0.248	0		8.079	1.013	0.894	0	3.159	16.56	ID=COSM162057;OCCURENCE=5(breast),1(prostate),1(central_nervous_system)		604542
chr17	39605634	-	C	het	1	0.0434783	intergenic	KRT38,KRT32
chr17	67144158	-	A	het	1	0.0434783	UTR3	ABCA10
chr17	67144622	-	A	hom	1	0.0434783	UTR3	ABCA10
chr17	67145027	-	T	het	1	0.0434783	exonic	ABCA10	frameshift insertion	ABCA10:NM_080282:exon40:c.4572_4573insA:p.V1525fs
chr17	67170736	-	G	het	1	0.0434783	splicing	ABCA10
chr17	67189620	A	G	het	1	0.0434783	splicing	ABCA10										0.000116	rs372033537
chr17	67230257	T	C	het	3	0.130435	ncRNA_exonic	PRO1804			0.0008	0.0029				0.001
chr17	67230586	A	-	het	1	0.0434783	ncRNA_exonic	PRO1804
chr17	79218641	A	-	het	1	0.0434783	UTR3	SLC38A10
chr17	79219313	C	T	het	1	0.0434783	UTR3	SLC38A10										0.000144	rs377603933
chr18	59712463	G	-	het	1	0.0434783	UTR3	PIGN											rs201169581
chr18	59712528	A	-	het	1	0.0434783	UTR3	PIGN
chr18	59752471	A	-	het	1	0.0434783	exonic	PIGN	frameshift deletion	PIGN:NM_012327:exon25:c.2397delT:p.F799fs,PIGN:NM_176787:exon26:c.2397delT:p.F799fs
chr18	59777160	A	-	het	1	0.0434783	exonic	PIGN	stopgain	PIGN:NM_012327:exon16:c.1481delT:p.L494X,PIGN:NM_176787:exon17:c.1481delT:p.L494X
chr19	4466478	G	A	het	2	0.0869565	intergenic	UBXN6,HDGFRP2
chr19	4466616	A	C	het	1	0.0434783	intergenic	UBXN6,HDGFRP2
chr19	4466621	A	T	het	1	0.0434783	intergenic	UBXN6,HDGFRP2
chr19	4466734	C	T	het	1	0.0434783	intergenic	UBXN6,HDGFRP2
chr19	4478636	G	A	het	3	0.130435	intronic	HDGFRP2
chr19	4479037	-	G	het	1	0.0434783	intronic	HDGFRP2
chr19	4493745	G	-	het	1	0.0434783	exonic	HDGFRP2	frameshift deletion	HDGFRP2:NM_001001520:exon7:c.724delG:p.G242fs,HDGFRP2:NM_032631:exon7:c.724delG:p.G242fs
chr19	4494339	G	-	het	1	0.0434783	exonic	HDGFRP2	frameshift deletion	HDGFRP2:NM_001001520:exon9:c.1091delG:p.R364fs,HDGFRP2:NM_032631:exon9:c.1091delG:p.R364fs
chr19	4497114	C	-	het	1	0.0434783	intronic	HDGFRP2
chr19	4501243	G	-	het	1	0.0434783	exonic	HDGFRP2	frameshift deletion	HDGFRP2:NM_001001520:exon16:c.1830delG:p.K610fs,HDGFRP2:NM_032631:exon16:c.1830delG:p.K610fs
chr19	9235732	G	A	het	1	0.0434783	downstream	OR7G3
chr19	9235756	A	T	het	1	0.0434783	downstream	OR7G3
chr19	9235758	T	A	het	1	0.0434783	downstream	OR7G3
chr19	9236917	G	A	het	1	0.0434783	exonic	OR7G3	nonsynonymous SNV	OR7G3:NM_001001958:exon1:c.710C>T:p.A237V									rs61730387	0.02	0.938	0.818	8.03	2.91			0.975	2.455	0.027	0.002	4.20981	10.761	1.038	3.298	0.338	4.21	21.9
chr19	9237723	T	C	het	1	0.0434783	upstream	OR7G3											rs10414701
chr19	9238074	C	T	het	1	0.0434783	upstream	OR7G3
chr19	9238113	T	C	het	1	0.0434783	upstream	OR7G3
chr19	9794683	A	G	het	1	0.0434783	intergenic	ZNF562,ZNF812
chr19	9800010	C	T	het	1	0.0434783	downstream	ZNF812
chr19	9801343	T	C	het	2	0.0869565	exonic	ZNF812	nonsynonymous SNV	ZNF812:NM_001199814:exon6:c.836A>G:p.Y279C									rs141049501	1	0	0	6.46	0.335			1	-3.295	0	0		6.062	0.146	4.601	0.096	-2.177	0.005
chr19	9842582	A	T	het	1	0.0434783	intergenic	ZNF812,ZNF846
chr19	17397501	-	G	het	1	0.0434783	exonic	ANKLE1	frameshift insertion	ANKLE1:NM_001278444:exon8:c.1933_1934insG:p.L645fs
chr19	23926952	G	A	het	1	0.0434783	exonic	ZNF681	nonsynonymous SNV	ZNF681:NM_138286:exon4:c.1400C>T:p.T467I										0.25	0.725	0.142	3.17	-3.01			1	-0.665	0	0.006		3.114	-1.042	-6.306	0.061	0.131	4.705
chr19	38375738	T	C	het	3	0.130435	exonic	WDR87	nonsynonymous SNV	WDR87:NM_001291088:exon6:c.8573A>G:p.Q2858R,WDR87:NM_031951:exon6:c.8456A>G:p.Q2819R				0.002				0.001886	rs200123506	0.14	0.035	0.031	3.01	-2.55			1	0.345	0	0.014		4.2	-0.439	0.242	0.107	0.86	8.482
chr19	38379634	C	T	het	1	0.0434783	exonic	WDR87	synonymous SNV	WDR87:NM_001291088:exon6:c.4677G>A:p.E1559E,WDR87:NM_031951:exon6:c.4560G>A:p.E1520E		0.0014		0.001				0.000629	rs145179229
chr19	44351743	G	T	het	3	0.130435	exonic	ZNF283	nonsynonymous SNV	ZNF283:NM_001297752:exon6:c.573G>T:p.W191C,ZNF283:NM_181845:exon7:c.990G>T:p.W330C										0.18	0.96	0.604	1.26	3			1	-0.255	0	0.054		7.494	1.69	-0.085	0.382	-0.106	3.48
chr19	44352665	TG	CA	het	3	0.130435	exonic	ZNF283	nonframeshift substitution	ZNF283:NM_001297752:exon6:c.1495_1496CA,ZNF283:NM_181845:exon7:c.1912_1913CA
chr19	45029164	-	G	het	1	0.0434783	exonic	CEACAM20	frameshift insertion	CEACAM20:NM_001102597:exon2:c.165dupC:p.R56fs,CEACAM20:NM_001102598:exon2:c.165dupC:p.R56fs,CEACAM20:NM_001102599:exon2:c.165dupC:p.R56fs,CEACAM20:NM_001102600:exon2:c.165dupC:p.R56fs
chr19	51988257	C	T	het	2	0.0869565	exonic	CEACAM18	synonymous SNV	CEACAM18:NM_001278392:exon5:c.987C>T:p.V329V				0.001					rs144361222
chr19	51994278	C	T	het	1	0.0434783	downstream	CEACAM18,SIGLEC12			0.0045			0.001
chr19	51994308	A	G	het	1	0.0434783	downstream	CEACAM18,SIGLEC12			0.0045			0.001
chr19	51994980	-	G	het	1	0.0434783	exonic	SIGLEC12	frameshift insertion	SIGLEC12:NM_033329:exon7:c.1348dupC:p.L450fs,SIGLEC12:NM_053003:exon8:c.1702dupC:p.L568fs
chr19	52001324	-	G	het	1	0.0434783	exonic	SIGLEC12	frameshift insertion	SIGLEC12:NM_033329:exon4:c.998dupC:p.P333fs,SIGLEC12:NM_053003:exon5:c.1352dupC:p.P451fs
chr19	52008370	T	-	het	1	0.0434783	intergenic	SIGLEC12,SIGLEC6
chr19	53948418	-	A	het	1	0.0434783	UTR5	ZNF761
chr19	53949464	T	C	het	1	0.0434783	splicing	ZNF761
chr19	53953348	G	A	het	3	0.130435	UTR3	ZNF761
chr19	53953402	G	A	het	1	0.0434783	UTR3	ZNF761
chr19	53953403	A	C	het	1	0.0434783	UTR3	ZNF761
chr19	53953426	AT	GG	het	2	0.0869565	UTR3	ZNF761
chr19	53958295	A	G	het	1	0.0434783	exonic	ZNF761	synonymous SNV	ZNF761:NM_001289951:exon6:c.534A>G:p.Q178Q,ZNF761:NM_001289952:exon6:c.534A>G:p.Q178Q,ZNF761:NM_001008401:exon7:c.534A>G:p.Q178Q
chr19	53959283	-	C	het	1	0.0434783	exonic	ZNF761	frameshift insertion	ZNF761:NM_001289951:exon6:c.1522_1523insC:p.Y508fs,ZNF761:NM_001289952:exon6:c.1522_1523insC:p.Y508fs,ZNF761:NM_001008401:exon7:c.1522_1523insC:p.Y508fs
chr19	53960232	-	G	het	1	0.0434783	UTR3	ZNF761
chr2	96517431	A	T	het	1	0.0434783	intergenic	LINC00342,FAHD2CP
chr2	96517452	T	C	het	1	0.0434783	intergenic	LINC00342,FAHD2CP											rs71235233	0.23	0	0	4.07	-0.131			1	0	0	0.04		5.063	-0.064	-0.032	0.039	-1.003	0.256
chr2	96517471	A	G	het	4	0.173913	intergenic	LINC00342,FAHD2CP											rs77124870	1	0	0	4.68	0.901			1	-0.55	0	0.019		6.579	0.312	1.012	0.092	-1.368	0.026
chr2	96517474	G	A	het	3	0.130435	intergenic	LINC00342,FAHD2CP											rs76276218	0	0	0	3.98	-0.324			1	0.55	0	0.057		4.988	-0.103	0.475	0.233	2.037	12.77
chr2	96517484	T	G	het	6	0.26087	intergenic	LINC00342,FAHD2CP											rs76384706	0.54	0	0	3.98	-2.13			1	-0.55	0	0.027		4.716	-0.673	-0.776	0.151	-1.833	0.009	ID=COSM1180683,COSM1180682,COSM1180681;OCCURENCE=1(upper_aerodigestive_tract)
chr2	96517502	A	C	het	10	0.434783	intergenic	LINC00342,FAHD2CP											rs79392443	0.23	0	0	3.99	-3.59			1	0.345	0	0.037		0.308	-0.786	-0.347	0.106	0.19	5.025
chr2	96517518	A	G	het	15	0.652174	intergenic	LINC00342,FAHD2CP											rs74755605	1	0	0	4.3	-0.11			1	-1.545	0	0.016		5.925	-0.057	1.583	0.025	-2.089	0.006
chr2	96517552	A	C	het	1	0.0434783	intergenic	LINC00342,FAHD2CP											rs2872926
chr2	96517882	G	A	het	6	0.26087	intergenic	LINC00342,FAHD2CP											rs62156871
chr2	96519447	G	T	het	1	0.0434783	intergenic	LINC00342,FAHD2CP											rs201455039
chr2	96519520	G	A	het	1	0.0434783	intergenic	LINC00342,FAHD2CP											rs2109985
chr2	96519559	TCGT	-	het	1	0.0434783	intergenic	LINC00342,FAHD2CP											rs373126569
chr2	96521481	C	T	het	3	0.130435	intergenic	LINC00342,FAHD2CP											rs200660194	0.31	0	0	2.46	-3.74			1	-0.52	0	0.012		0.245	-1.681	-1.863	0.11	-2.056	0.006
chr2	96521486	G	A	het	1	0.0434783	intergenic	LINC00342,FAHD2CP											rs201100797	0.1	0	0	2.62	-2.16			1	0.88	0	0.024		3.811	-0.596	0.017	0.181	-2.315	0.004
chr2	96521512	A	C	het	8	0.347826	intergenic	LINC00342,FAHD2CP											rs78536198	0.45	0	0	2.81	0.974			0.763	-1.67	0	0.007		7.621	0.354	2.014	0.353	-1.991	0.007
chr2	96521548	G	A	het	6	0.26087	intergenic	LINC00342,FAHD2CP											rs112058478
chr2	96521556	T	C	het	6	0.26087	intergenic	LINC00342,FAHD2CP											rs77601294	0.17	0	0	2.21	-2.32			0.996	1.37	0	0.038		7.081	-0.639	0.636	0.075	0.365	5.983
chr2	96521563	G	A	het	6	0.26087	intergenic	LINC00342,FAHD2CP											rs75218243
chr2	96523047	A	T	het	1	0.0434783	intergenic	LINC00342,FAHD2CP
chr2	96525640	G	T	het	5	0.217391	intergenic	LINC00342,FAHD2CP											rs1636083	0.19	0.005	0.004	2.61	-0.114			0.999	0.6	0	0.019		4.453	-0.043	-0.545	0.187	-0.941	0.358	ID=COSM1318871,COSM1318870,COSM1318869;OCCURENCE=2(haematopoietic_and_lymphoid_tissue)
chr2	96525643	T	C	het	3	0.130435	intergenic	LINC00342,FAHD2CP											rs1636082	0.27	0	0	2.33	1.85			1	0	0	0.02		7.648	1.11	0.669	0.208	-0.096	3.531
chr2	96525652	T	C	het	9	0.391304	intergenic	LINC00342,FAHD2CP											rs77710257	1	0.003	0.006	2.48	0.956			1	-2.14	0	0.006		6.957	0.319	1.633	0.118	-2.596	0
chr2	96525659	C	T	het	6	0.26087	intergenic	LINC00342,FAHD2CP											rs1636081
chr2	96525702	C	T	het	1	0.0434783	intergenic	LINC00342,FAHD2CP											rs71255701	0.47	0.618	0.187	1.94	0.951			1	0.955	0	0.027		4.087	0.346	0.067	0.068	-0.925	0.387
chr2	96525718	G	T	het	9	0.391304	intergenic	LINC00342,FAHD2CP											rs77057279	0.72	0.053	0.021	2.42	-3.7			0.994	-1.7	0	0.008		3.712	-1.374	-0.833	0.245	-3.33	0.001
chr2	96525723	C	T	het	8	0.347826	intergenic	LINC00342,FAHD2CP											rs77757712	0.93	0.055	0.007	2.42	0.634			1	-1.355	0	0.01		5.605	0.138	0.54	0.097	-0.493	1.736
chr2	96525736	T	C	het	8	0.347826	intergenic	LINC00342,FAHD2CP											rs78585559	0.33	0.618	0.296	2.35	1.85			1	0.345	0	0.022		3.593	1.11	0.027	0.211	-0.948	0.346	ID=COSM1615240,COSM1615239,COSM1615241;OCCURENCE=1(liver)
chr2	96525750	T	A	het	6	0.26087	intergenic	LINC00342,FAHD2CP											rs76379993	0.37	0.898	0.775	2.2	-0.873			1	1.965	0	0.066		2.065	-0.207	1.019	0.49	0.033	4.184	ID=COSM1615244,COSM1615243,COSM1615242;OCCURENCE=2(liver)
chr2	96525755	A	T	het	5	0.217391	intergenic	LINC00342,FAHD2CP											rs77658288	0.73	0.886	0.685	2.36	0.608			1	1.1	0	0.037		4.768	0.161	0.077	0.093	0.511	6.772	ID=COSM1615247,COSM1615246,COSM1615245;OCCURENCE=2(liver)
chr2	96525768	G	A	het	2	0.0869565	intergenic	LINC00342,FAHD2CP											rs78780931	0.82	0	0	2.38	0.635			1	-1.385	0	0.01		5.605	0.138	3.039	0.175	-3.138	0.001	ID=COSM1615249,COSM1615250,COSM1615248;OCCURENCE=1(liver)
chr2	96525771	A	C	het	1	0.0434783	intergenic	LINC00342,FAHD2CP											rs74941794	0.59	0	0	0	-0.698			0	0	0	0	15.3017	5.748	-0.207	0.666	0	15.302	49	ID=COSM1615252,COSM1615251,COSM1615253;OCCURENCE=1(liver)
chr2	96593000	A	G	het	1	0.0434783	intergenic	LINC00342,FAHD2CP											rs111976783	0.77	0	0	-1.08	-1.16			1	2.175	0	0.326		0	-0.58	0.588	0.253	0.721	7.838	ID=COSM477752;OCCURENCE=1(kidney),1(lung)
chr2	96593016	C	A	het	2	0.0869565	intergenic	LINC00342,FAHD2CP											rs79307257	0.01	0	0	-1.1	0.578			1	2.175	0	0.446		0	0.573	0.559	0.443	1.148	9.675	ID=COSM477753;OCCURENCE=1(kidney),1(lung)
chr2	96593025	C	T	het	5	0.217391	intergenic	LINC00342,FAHD2CP											rs75189823	0.08	0	0	-1.07	0.578			1	2.135	0	0.463		0	0.573	1.62	0.042	2.046	12.8	ID=COSM477754;OCCURENCE=1(kidney),1(prostate),1(lung)
chr2	96594878	G	C	het	1	0.0434783	intergenic	LINC00342,FAHD2CP											rs375866621	1	0	0	-0.99	-0.054			1	0	0	0.12		4.774	-0.059	0.169	0.057	0.583	7.149
chr2	96594881	G	A	het	1	0.0434783	intergenic	LINC00342,FAHD2CP											rs111499669
chr2	96594883	C	T	het	1	0.0434783	intergenic	LINC00342,FAHD2CP											rs111462973	0.48	0	0	-1	-0.087			1	0	0	0.178		3.151	-0.07	0.689	0.032	1.786	11.93
chr2	96594906	-	A	het	2	0.0869565	intergenic	LINC00342,FAHD2CP											rs141793716
chr2	96595032	A	T	het	6	0.26087	intergenic	LINC00342,FAHD2CP											rs62153723
chr2	96601238	C	T	het	1	0.0434783	intergenic	LINC00342,FAHD2CP											rs71209863	0.2	0	0	-1.04	0.967			1	0	0	0.292		5.254	0.824	0.043	0.28	1.448	10.78
chr2	96601240	G	A	het	6	0.26087	intergenic	LINC00342,FAHD2CP											rs62153752	0.86	0	0	-1.04	-0.477			1	0	0	0.147		1.917	-1.203	0.372	0.088	1.092	9.457
chr2	96601345	T	C	het	11	0.478261	intergenic	LINC00342,FAHD2CP											rs74453630
chr2	96601364	C	T	het	9	0.391304	intergenic	LINC00342,FAHD2CP											rs62153754
chr2	96604576	C	T	het	2	0.0869565	intergenic	LINC00342,FAHD2CP												0	0	0	0	1.22			1	0	0	0		5.819	0.949	1.495	0	0.416	6.26
chr2	96604591	A	G	het	20	0.869565	intergenic	LINC00342,FAHD2CP											rs62154561	0.15	0	0	-1.01	-2.45			1	0	0	0.244		0.064	-1.412	-0.593	0.14	0.408	6.217
chr2	96604606	C	A	het	3	0.130435	intergenic	LINC00342,FAHD2CP											rs80350011	0.09	0	0	0.54	1.22			1	0	0	0.139		5.819	0.949	-0.271	0.359	1.016	9.151
chr2	96604632	A	T	het	19	0.826087	intergenic	LINC00342,FAHD2CP											rs62154562	0.06	0	0	1.48	1.22			1	0	0	0.035		3.342	-0.03	0.069	0.17	-0.38	2.213
chr2	96604730	T	C	het	9	0.391304	intergenic	LINC00342,FAHD2CP											rs72933833
chr2	96604747	C	T	het	1	0.0434783	intergenic	LINC00342,FAHD2CP											rs71213114
chr2	96606944	C	T	het	8	0.347826	intergenic	LINC00342,FAHD2CP											rs78739183	0.53	0	0	2.15	1.01			1	0	0	0.02		4.173	0.372	0.721	0.669	0.609	7.282
chr2	96610399	C	A	het	5	0.217391	intergenic	LINC00342,FAHD2CP											rs116594293	0.04	0	0	2.13	-1.37			1	0	0	0.022		2.354	-0.307	-0.575	0.382	0.175	4.943
chr2	96610410	T	A	het	6	0.26087	intergenic	LINC00342,FAHD2CP											rs77220524	0.09	0	0	2.14	0.271			1	0	0	0.024		3.325	0.09	0.129	0.504	0.28	5.517
chr2	96610413	C	T	het	5	0.217391	intergenic	LINC00342,FAHD2CP											rs74491979	0.32	0	0	2.04	1.47			1	0	0	0.025		6.535	1.168	1.157	0.531	1.069	9.365
chr2	96610420	G	T	het	4	0.173913	intergenic	LINC00342,FAHD2CP											rs78473403	1	0	0	1.95	-2.23			1	0	0	0.016		0.487	-0.695	-0.077	0.27	0.178	4.959
chr2	96610455	C	A	het	1	0.0434783	intergenic	LINC00342,FAHD2CP											rs1984919
chr2	96610899	T	C	het	16	0.695652	intergenic	LINC00342,FAHD2CP											rs62154593
chr2	96610921	T	G	het	16	0.695652	intergenic	LINC00342,FAHD2CP											rs62154594	1	0	0	2.13	-2.07			1	0	0	0.017		2.808	-2.446	-1.556	0.186	-0.973	0.303
chr2	96610923	C	G	het	10	0.434783	intergenic	LINC00342,FAHD2CP											rs1819101	0	0	0	0	1.04			0.998	0	0	0		5.411	0.861	0.289	0	-0.626	1.223
chr2	96616485	C	G	het	8	0.347826	intergenic	LINC00342,FAHD2CP											rs78218362
chr2	96616504	C	A	het	7	0.304348	intergenic	LINC00342,FAHD2CP											rs78179792	0.47	0	0	2.18	-1.55			1	0	0	0.018		2.286	-0.428	-0.498	0.122	0.297	5.609
chr2	96616506	GC	CA	het	3	0.130435	intergenic	LINC00342,FAHD2CP
chr2	96616532	T	G	het	7	0.304348	intergenic	LINC00342,FAHD2CP											rs76743459
chr2	96617090	A	G	het	11	0.478261	intergenic	LINC00342,FAHD2CP											rs72935833
chr2	96617106	A	C	het	10	0.434783	intergenic	LINC00342,FAHD2CP											rs76943414
chr2	96617111	G	A	het	10	0.434783	intergenic	LINC00342,FAHD2CP								0.002			rs76474100	1	0	0	0	-0.49			0	0	0	0		3.763	-0.161	-0.119	0	1.691	11.61
chr2	96617113	G	A	het	10	0.434783	intergenic	LINC00342,FAHD2CP											rs80297803	0.3	0	0	2.16	-2.9			1	0	0	0.02		2.642	-1.028	-0.69	0.247	-0.149	3.27
chr2	96617125	T	C	het	10	0.434783	intergenic	LINC00342,FAHD2CP											rs75585230	0.07	0	0	2.14	-2.9			1	-0.345	0	0.019		4.566	-2.851	-1.296	0.083	0.251	5.358
chr2	96617132	T	C	het	10	0.434783	intergenic	LINC00342,FAHD2CP											rs75695780	0.95	0	0	2.11	-1.78			1	0	0	0.018		5.094	-0.503	0.38	0.157	-0.122	3.403
chr2	96617155	A	G	het	9	0.391304	intergenic	LINC00342,FAHD2CP											rs76752473	0.74	0	0	2.08	-3.03			1	-0.55	0	0.015		3.308	-1.053	-0.739	0.122	-0.637	1.185
chr2	96619688	T	G	het	7	0.304348	intergenic	LINC00342,FAHD2CP											rs74946480	0.53	0	0	2.15	-1.13			1	0.55	0	0.024		2.353	-0.306	0.127	0.232	0.417	6.264
chr2	96619734	C	T	het	15	0.652174	intergenic	LINC00342,FAHD2CP											rs62154618	0.16	0	0	0.88	-2.8			1	0	0	0.046		4.695	-1.947	-1.894	0.241	-0.156	3.237
chr2	96619734	CA	TG	het	4	0.173913	intergenic	LINC00342,FAHD2CP
chr2	96626292	C	T	hom	2	0.0869565	intergenic	LINC00342,FAHD2CP											rs4362598	0.65	0	0	2.95	-1.81			1	0	0	0		0.294	-3.155	-0.143	0.186	-3.268	0.001
chr2	96648036	T	-	het	1	0.0434783	intergenic	LINC00342,FAHD2CP
chr2	96648042	-	T	het	1	0.0434783	intergenic	LINC00342,FAHD2CP
chr2	98128150	G	A	het	1	0.0434783	exonic	ANKRD36B	synonymous SNV	ANKRD36B:NM_025190:exon39:c.3171C>T:p.H1057H									rs75626580
chr2	98128172	C	A	het	2	0.0869565	exonic	ANKRD36B	nonsynonymous SNV	ANKRD36B:NM_025190:exon39:c.3149G>T:p.R1050L									rs74900052
chr2	98128183	C	G	het	2	0.0869565	exonic	ANKRD36B	synonymous SNV	ANKRD36B:NM_025190:exon39:c.3138G>C:p.L1046L									rs201935800
chr2	98128194	GGT	CAC	het	1	0.0434783	exonic	ANKRD36B	nonframeshift substitution	ANKRD36B:NM_025190:exon39:c.3125_3127GTG
chr2	98128228	G	A	het	1	0.0434783	exonic	ANKRD36B	synonymous SNV	ANKRD36B:NM_025190:exon39:c.3093C>T:p.S1031S									rs78527728																			ID=COSN395741;OCCURENCE=1(lung)
chr2	98128234	T	C	het	1	0.0434783	exonic	ANKRD36B	synonymous SNV	ANKRD36B:NM_025190:exon39:c.3087A>G:p.R1029R									rs199956303
chr2	98128256	C	T	het	1	0.0434783	exonic	ANKRD36B	nonsynonymous SNV	ANKRD36B:NM_025190:exon39:c.3065G>A:p.R1022H									rs62157160
chr2	98128258	G	C	het	1	0.0434783	exonic	ANKRD36B	synonymous SNV	ANKRD36B:NM_025190:exon39:c.3063C>G:p.L1021L									rs62156259
chr2	98164020	CT	TC	het	1	0.0434783	exonic	ANKRD36B	nonframeshift substitution	ANKRD36B:NM_025190:exon22:c.1557_1558GA
chr2	98201508	C	A	het	2	0.0869565	exonic	ANKRD36B	nonsynonymous SNV	ANKRD36B:NM_025190:exon3:c.349G>T:p.V117F									rs2442303
chr2	131368456	C	T	het	1	0.0434783	upstream	POTEJ
chr2	131368495	C	T	het	1	0.0434783	upstream	POTEJ											rs143628306
chr2	131368501	CGCACGC	-	het	1	0.0434783	upstream	POTEJ
chr2	131414176	C	T	het	8	0.347826	exonic	POTEJ	nonsynonymous SNV	POTEJ:NM_001277083:exon15:c.1843C>T:p.R615W									rs62165276	0	0	0	2.41	0.993			1	1.15	0	0.043		7.879	0.847	-0.12	0.263	0.484	6.627
chr2	175292593	G	T	het	1	0.0434783	exonic	SCRN3	nonsynonymous SNV	SCRN3:NM_001193528:exon8:c.1224G>T:p.Q408H,SCRN3:NM_024583:exon8:c.1245G>T:p.Q415H									rs79038555	0	0.291	0.087	3.08	1.87			1	0.55	0.804	0.013		2.097	0.338	-0.109	0.072	2.432	14.09			614967
chr2	175292925	T	C	het	1	0.0434783	UTR3	SCRN3
chr2	175293346	-	G	het	1	0.0434783	UTR3	SCRN3
chr2	175293418	-	T	het	1	0.0434783	UTR3	SCRN3
chr2	186603785	-	G	het	1	0.0434783	ncRNA_exonic	LOC101927196
chr2	186625769	-	G	hom	1	0.0434783	exonic	FSIP2	frameshift insertion	FSIP2:NM_173651:exon10:c.1400_1401insG:p.K467fs
chr2	186626751	A	T	het	1	0.0434783	splicing	FSIP2			0.0008								rs148418635
chr2	186655917	-	T	het	1	0.0434783	exonic	FSIP2	frameshift insertion	FSIP2:NM_173651:exon16:c.4322dupT:p.I1441fs
chr2	186658184	T	A	het	1	0.0434783	exonic	FSIP2	nonsynonymous SNV	FSIP2:NM_173651:exon16:c.6588T>A:p.F2196L										0.63	0	0	1.01	1.45			1	0	0	0.04		3.836	0.085	-0.073	0.237	0.333	5.804			615796
chr2	186658899	G	C	het	1	0.0434783	exonic	FSIP2	nonsynonymous SNV	FSIP2:NM_173651:exon16:c.7303G>C:p.A2435P				0.001					rs201278788	0.02	0	0	0.63	-0.839			1	0	0	0.058		3.073	0.124	-0.542	0.733	0.896	8.639			615796
chr2	186660782	-	A	het	1	0.0434783	exonic	FSIP2	frameshift insertion	FSIP2:NM_173651:exon16:c.9187dupA:p.N3062fs
chr2	186661995	-	A	het	1	0.0434783	exonic	FSIP2	frameshift insertion	FSIP2:NM_173651:exon16:c.10400dupA:p.E3467fs
chr2	186664516	-	T	het	1	0.0434783	exonic	FSIP2	frameshift insertion	FSIP2:NM_173651:exon17:c.10751dupT:p.I3584fs
chr2	186664988	C	T	het	1	0.0434783	exonic	FSIP2	nonsynonymous SNV	FSIP2:NM_173651:exon17:c.11222C>T:p.A3741V										0.36	0	0	1	-8.36			1	0	0.026	0.044		5.992	-2.369	-4.335	0.092	-1.065	0.178			615796
chr2	186668707	-	T	het	1	0.0434783	exonic	FSIP2	frameshift insertion	FSIP2:NM_173651:exon17:c.14942dupT:p.V4981fs
chr2	186670335	A	-	het	1	0.0434783	exonic	FSIP2	frameshift deletion	FSIP2:NM_173651:exon17:c.16569delA:p.A5523fs
chr2	186670756	A	-	het	1	0.0434783	exonic	FSIP2	frameshift deletion	FSIP2:NM_173651:exon17:c.16990delA:p.K5664fs
chr2	186670761	AG	-	het	1	0.0434783	exonic	FSIP2	frameshift deletion	FSIP2:NM_173651:exon17:c.16995_16996del:p.K5665fs
chr2	186672631	-	A	het	1	0.0434783	exonic	FSIP2	frameshift insertion	FSIP2:NM_173651:exon17:c.18866dupA:p.E6289fs
chr2	186689143	C	G	het	1	0.0434783	splicing	FSIP2			0.0008
chr2	186698063	-	A	het	1	0.0434783	downstream	FSIP2
chr2	186698922	-	A	het	1	0.0434783	downstream	FSIP2
chr2	186898135	-	T	het	1	0.0434783	downstream	LINC01473
chr2	186923509	T	C	het	2	0.0869565	ncRNA_intronic	LINC01473				0.0014		0.001		0.001
chr2	187220347	T	-	het	1	0.0434783	intergenic	LINC01473,ZC3H15
chr2	187220443	-	A	het	1	0.0434783	intergenic	LINC01473,ZC3H15
chr2	206547706	G	A	het	1	0.0434783	UTR5	NRP2						0.002		0.0051			rs139877019
chr2	206641059	G	-	het	1	0.0434783	exonic	NRP2	frameshift deletion	NRP2:NM_018534:exon16:c.2530delG:p.G844fs,NRP2:NM_201267:exon16:c.2515delG:p.G839fs
chr2	206660766	GA	-	het	1	0.0434783	UTR3	NRP2
chr2	206813874	C	-	het	1	0.0434783	intergenic	NRP2,INO80D
chr20	33763951	-	T	het	1	0.0434783	splicing	PROCR
chr21	16119450	-	T	het	1	0.0434783	intergenic	LOC388813,NRIP1
chr21	16120259	T	-	het	1	0.0434783	intergenic	LOC388813,NRIP1
chr21	16120529	G	A	het	1	0.0434783	intergenic	LOC388813,NRIP1			0.0015
chr21	16129951	-	G	het	1	0.0434783	intergenic	LOC388813,NRIP1
chr21	16192289	-	T	het	1	0.0434783	intergenic	LOC388813,NRIP1
chr21	16193045	T	G	het	2	0.0869565	intergenic	LOC388813,NRIP1				0.0014		0.003					rs185038854
chr21	16193644	A	C	het	1	0.0434783	intergenic	LOC388813,NRIP1
chr21	16195445	A	G	het	1	0.0434783	intergenic	LOC388813,NRIP1
chr21	16209630	-	T	het	1	0.0434783	intergenic	LOC388813,NRIP1
chr21	16225709	C	A	het	1	0.0434783	intergenic	LOC388813,NRIP1
chr21	16229934	G	C	het	1	0.0434783	intergenic	LOC388813,NRIP1						0.001
chr21	16229944	G	A	het	1	0.0434783	intergenic	LOC388813,NRIP1
chr21	32114275	A	G	het	1	0.0434783	intergenic	KRTAP21-3,KRTAP21-2											rs73190005
chr21	32114298	T	C	het	1	0.0434783	intergenic	KRTAP21-3,KRTAP21-2											rs75998107
chr21	32114532	C	T	het	6	0.26087	intergenic	KRTAP21-3,KRTAP21-2											rs63749430
chr21	32114564	T	G	het	1	0.0434783	intergenic	KRTAP21-3,KRTAP21-2											rs74209642
chr21	34860580	A	-	het	1	0.0434783	exonic	DNAJC28	stopgain	DNAJC28:NM_001040192:exon2:c.1121delT:p.L374X,DNAJC28:NM_017833:exon2:c.1121delT:p.L374X
chr21	34860909	G	A	het	1	0.0434783	exonic	DNAJC28	synonymous SNV	DNAJC28:NM_001040192:exon2:c.792C>T:p.S264S,DNAJC28:NM_017833:exon2:c.792C>T:p.S264S
chr22	32080794	-	A	het	1	0.0434783	UTR3	PRR14L
chr22	32109628	C	T	het	1	0.0434783	exonic	PRR14L	synonymous SNV	PRR14L:NM_173566:exon4:c.4197G>A:p.L1399L
chr22	32109694	A	-	het	1	0.0434783	exonic	PRR14L	frameshift deletion	PRR14L:NM_173566:exon4:c.4131delT:p.F1377fs
chr22	32113036	T	C	het	3	0.130435	exonic	PRR14L	synonymous SNV	PRR14L:NM_173566:exon4:c.789A>G:p.T263T		0.0058		0.004			0.001445	0.0066	rs147348699
chr3	12953190	C	A	het	1	0.0434783	exonic	IQSEC1	synonymous SNV	IQSEC1:NM_001134382:exon10:c.2355G>T:p.T785T,IQSEC1:NM_014869:exon10:c.2397G>T:p.T799T										0	0	0	0	-7.55			1	0	0	0.147		8.206	-1.166	-4.509	0	1.056	9.313			610166
chr3	12977270	G	A	het	1	0.0434783	exonic	IQSEC1	nonsynonymous SNV	IQSEC1:NM_001134382:exon3:c.1246C>T:p.L416F,IQSEC1:NM_014869:exon3:c.1288C>T:p.L430F										0.55	0.788	0.293	0.82	3.61			1	0	0.017	0.114		12.069	2.346	0.191	0.115	-1.437	0.02			610166
chr3	50000042	-	T	het	1	0.0434783	UTR5	RBM6
chr3	50005136	-	G	het	1	0.0434783	exonic	RBM6	frameshift insertion	RBM6:NM_005777:exon3:c.278_279insG:p.H93fs
chr3	75762174	G	A	het	9	0.391304	intergenic	LINC00960,ZNF717											rs76949695
chr3	75762186	C	G	het	12	0.521739	intergenic	LINC00960,ZNF717											rs77197071
chr3	75762189	A	G	het	19	0.826087	intergenic	LINC00960,ZNF717											rs73114912
chr3	75762195	C	T	het	14	0.608696	intergenic	LINC00960,ZNF717											rs76157637
chr3	75762201	T	G	het	15	0.652174	intergenic	LINC00960,ZNF717											rs74500333
chr3	75762210	C	A	het	7	0.304348	intergenic	LINC00960,ZNF717											rs7517969
chr3	75762216	C	T	het	18	0.782609	intergenic	LINC00960,ZNF717											rs74717962
chr3	75762218	A	T	het	17	0.73913	intergenic	LINC00960,ZNF717											rs78323697
chr3	75762222	C	T	het	16	0.695652	intergenic	LINC00960,ZNF717											rs74979548
chr3	75762242	A	G	het	17	0.73913	intergenic	LINC00960,ZNF717											rs76254909
chr3	75762268	C	A	het	13	0.565217	intergenic	LINC00960,ZNF717											rs75449965
chr3	75762268	CC	AT	het	2	0.0869565	intergenic	LINC00960,ZNF717
chr3	75762287	A	G	het	12	0.521739	intergenic	LINC00960,ZNF717											rs75369097
chr3	75762297	A	C	het	17	0.73913	intergenic	LINC00960,ZNF717											rs78157608
chr3	75762299	A	T	het	1	0.0434783	intergenic	LINC00960,ZNF717
chr3	75762313	T	C	het	2	0.0869565	intergenic	LINC00960,ZNF717											rs7521991
chr3	75762317	A	T	het	2	0.0869565	intergenic	LINC00960,ZNF717											rs112502186
chr3	75762323	G	A	het	15	0.652174	intergenic	LINC00960,ZNF717											rs78643669
chr3	75762327	A	G	het	15	0.652174	intergenic	LINC00960,ZNF717											rs79750506
chr3	75762334	A	C	het	16	0.695652	intergenic	LINC00960,ZNF717											rs76234386
chr3	75762345	T	A	het	19	0.826087	intergenic	LINC00960,ZNF717											rs79401560
chr3	75762351	G	C	het	17	0.73913	intergenic	LINC00960,ZNF717											rs76044182
chr3	75762390	C	A	het	14	0.608696	intergenic	LINC00960,ZNF717											rs80122626
chr3	75762400	C	G	het	10	0.434783	intergenic	LINC00960,ZNF717											rs77696330
chr3	75762407	T	C	het	15	0.652174	intergenic	LINC00960,ZNF717											rs74603418
chr3	75762421	C	A	het	6	0.26087	intergenic	LINC00960,ZNF717											rs78349568
chr3	75762424	C	T	het	12	0.521739	intergenic	LINC00960,ZNF717											rs74187229
chr3	75762447	A	G	het	2	0.0869565	intergenic	LINC00960,ZNF717											rs74538811
chr3	75762452	T	C	het	12	0.521739	intergenic	LINC00960,ZNF717											rs76107184
chr3	75762456	C	T	het	1	0.0434783	intergenic	LINC00960,ZNF717											rs74623240
chr3	75779769	C	G	het	21	0.913043	exonic;splicing	ZNF717;ZNF717	nonsynonymous SNV	ZNF717:NM_001290210:exon6:c.340G>C:p.V114L									rs72503549	0.6	0	0	5.6	-0.507			1	0	0	0.002		0	-1.507	-1.571	0.159	-1.44	0.02
chr3	75779772	G	A	het	2	0.0869565	splicing	ZNF717
chr3	75779778	A	-	het	10	0.434783	splicing	ZNF717											rs33966701
chr3	75779782	G	-	het	1	0.0434783	splicing	ZNF717											rs67165968
chr3	75779788	G	C	het	9	0.391304	splicing	ZNF717											rs141311667
chr3	75781200	G	T	het	3	0.130435	splicing	ZNF717											rs148895985
chr3	75781213	C	-	het	3	0.130435	exonic;splicing	ZNF717;ZNF717	frameshift deletion	ZNF717:NM_001290210:exon5:c.337delG:p.E113fs
chr3	75781222	C	T	het	21	0.913043	exonic;splicing	ZNF717;ZNF717	nonsynonymous SNV	ZNF717:NM_001290210:exon5:c.328G>A:p.E110K									rs62250084	0.77	0	0	5.47	0			1	0	0	0.001		0	-1.495	-1.531	0.153	-0.152	3.255
chr3	75781229	G	C	het	2	0.0869565	exonic;splicing	ZNF717;ZNF717	nonsynonymous SNV	ZNF717:NM_001290210:exon5:c.321C>G:p.S107R									rs201610454	0.02	0	0	5.63	0			1	0	0	0.005		0	0.119	0.17	0.206	0.726	7.861
chr3	75781243	T	C	het	20	0.869565	exonic	ZNF717	nonsynonymous SNV	ZNF717:NM_001290210:exon5:c.307A>G:p.I103V									rs62250085	0.56	0	0	5.65	0			1	0	0	0.002		0	0.103	0.147	0.186	-2.31	0.004
chr3	75781245	C	T	het	2	0.0869565	exonic	ZNF717	nonsynonymous SNV	ZNF717:NM_001290210:exon5:c.305G>A:p.G102D									rs140936221	0.54	0	0	5.67	0			1	0	0	0.002		0	0.119	0.145	0.197	-1.56	0.015
chr3	75781257	T	C	het	18	0.782609	exonic;splicing	ZNF717;ZNF717	nonsynonymous SNV	ZNF717:NM_001290210:exon5:c.293A>G:p.Q98R									rs62250086	0.25	0	0	5.65	0			1	0	0	0.002		0	-1.555	-1.45	0.138	-2.274	0.004
chr3	75781263	T	C	het	20	0.869565	exonic;splicing	ZNF717;ZNF717	nonsynonymous SNV	ZNF717:NM_001290210:exon5:c.287A>G:p.K96R									rs62250087	0.18	0	0	5.59	0			1	0	0	0.002		0	-1.749	-1.271	0.123	-0.325	2.458
chr3	75781272	C	A	het	17	0.73913	exonic;splicing	ZNF717;ZNF717	nonsynonymous SNV	ZNF717:NM_001290210:exon5:c.278G>T:p.G93V									rs79724453	0.47	0	0	5.64	0			1	0	0	0.002		0	0.119	0.145	0.213	-0.195	3.054
chr3	75786031	A	C	het	2	0.0869565	exonic	ZNF717	stoploss	ZNF717:NM_001128223:exon5:c.2743T>G:p.X915G,ZNF717:NM_001290208:exon5:c.2743T>G:p.X915G,ZNF717:NM_001290209:exon5:c.2593T>G:p.X865G									rs77251052	0	0	0	0	-2.87			1	0	0	0		3.922	-0.926	0.242	0	0.101	4.544
chr3	75786036	A	C	het	2	0.0869565	exonic	ZNF717	nonsynonymous SNV	ZNF717:NM_001128223:exon5:c.2738T>G:p.F913C,ZNF717:NM_001290208:exon5:c.2738T>G:p.F913C,ZNF717:NM_001290209:exon5:c.2588T>G:p.F863C									rs202029173	0	0.991	0.425	3.4	-0.029			1	0	0	0.012		4.624	-0.143	0	0.59	1.639	11.44
chr3	75786042	G	A	het	16	0.695652	exonic	ZNF717	nonsynonymous SNV	ZNF717:NM_001128223:exon5:c.2732C>T:p.S911F,ZNF717:NM_001290208:exon5:c.2732C>T:p.S911F,ZNF717:NM_001290209:exon5:c.2582C>T:p.S861F									rs77747132	0.3	0.024	0.002	3.37	-0.734			1	0	0	0.01		5.509	-0.244	-0.14	0.477	1.695	11.63
chr3	75786059	C	T	het	6	0.26087	exonic	ZNF717	synonymous SNV	ZNF717:NM_001128223:exon5:c.2715G>A:p.V905V,ZNF717:NM_001290208:exon5:c.2715G>A:p.V905V,ZNF717:NM_001290209:exon5:c.2565G>A:p.V855V									rs73843008
chr3	75786059	CA	TG	het	4	0.173913	exonic	ZNF717	nonframeshift substitution	ZNF717:NM_001128223:exon5:c.2714_2715CA,ZNF717:NM_001290208:exon5:c.2714_2715CA,ZNF717:NM_001290209:exon5:c.2564_2565CA
chr3	75786071	C	A	het	15	0.652174	exonic	ZNF717	nonsynonymous SNV	ZNF717:NM_001128223:exon5:c.2703G>T:p.E901D,ZNF717:NM_001290208:exon5:c.2703G>T:p.E901D,ZNF717:NM_001290209:exon5:c.2553G>T:p.E851D									rs111230396	0.17	0.111	0.006	3.39	-0.249			1	0	0	0.01		3.115	-0.078	-0.941	0.567	0.479	6.601
chr3	75786073	C	G	het	3	0.130435	exonic	ZNF717	nonsynonymous SNV	ZNF717:NM_001128223:exon5:c.2701G>C:p.E901Q,ZNF717:NM_001290208:exon5:c.2701G>C:p.E901Q,ZNF717:NM_001290209:exon5:c.2551G>C:p.E851Q									rs78323638	0.34	0.757	0.026	3.41	0.741			0.909	0	0	0.007		4.943	0.735	-0.203	0.683	-0.084	3.589
chr3	75786079	CG	TA	het	13	0.565217	exonic	ZNF717	nonframeshift substitution	ZNF717:NM_001128223:exon5:c.2694_2695TA,ZNF717:NM_001290208:exon5:c.2694_2695TA,ZNF717:NM_001290209:exon5:c.2544_2545TA
chr3	75786080	G	A	het	15	0.652174	exonic	ZNF717	synonymous SNV	ZNF717:NM_001128223:exon5:c.2694C>T:p.D898D,ZNF717:NM_001290208:exon5:c.2694C>T:p.D898D,ZNF717:NM_001290209:exon5:c.2544C>T:p.D848D									rs2118754
chr3	75786132	T	C	het	15	0.652174	exonic	ZNF717	nonsynonymous SNV	ZNF717:NM_001128223:exon5:c.2642A>G:p.Q881R,ZNF717:NM_001290208:exon5:c.2642A>G:p.Q881R,ZNF717:NM_001290209:exon5:c.2492A>G:p.Q831R									rs75085872	0.51	0.02	0.004	5.46	-0.78			1	0	0	0.002		1.651	-0.138	-1.375	0.494	-0.366	2.277
chr3	75786163	C	T	het	16	0.695652	exonic	ZNF717	nonsynonymous SNV	ZNF717:NM_001128223:exon5:c.2611G>A:p.E871K,ZNF717:NM_001290208:exon5:c.2611G>A:p.E871K,ZNF717:NM_001290209:exon5:c.2461G>A:p.E821K									rs75096310	0.74	0.049	0.048	2.16	-0.008			1	-0.705	0	0.015		2.041	0.009	-2.65	0.509	0.585	7.159	ID=COSM1173000;OCCURENCE=1(oesophagus)
chr3	75786175	C	A	het	4	0.173913	exonic	ZNF717	stopgain	ZNF717:NM_001128223:exon5:c.2599G>T:p.E867X,ZNF717:NM_001290208:exon5:c.2599G>T:p.E867X,ZNF717:NM_001290209:exon5:c.2449G>T:p.E817X									rs78135954	0.04	0	0	0	-3.48			0	0	0	0	5.00471	1.387	-2.182	2.108	0	5.005	29.4
chr3	75786211	A	G	het	17	0.73913	exonic	ZNF717	nonsynonymous SNV	ZNF717:NM_001128223:exon5:c.2563T>C:p.S855P,ZNF717:NM_001290208:exon5:c.2563T>C:p.S855P,ZNF717:NM_001290209:exon5:c.2413T>C:p.S805P									rs77715040	0	0.178	0.056	3.15	1.59			1	2.8	0	0.033		7.316	1.02	-3.336	0.597	1.732	11.75
chr3	75786221	G	A	het	4	0.173913	exonic	ZNF717	synonymous SNV	ZNF717:NM_001128223:exon5:c.2553C>T:p.F851F,ZNF717:NM_001290208:exon5:c.2553C>T:p.F851F,ZNF717:NM_001290209:exon5:c.2403C>T:p.F801F									rs75470517
chr3	75786225	G	A	het	17	0.73913	exonic	ZNF717	nonsynonymous SNV	ZNF717:NM_001128223:exon5:c.2549C>T:p.T850I,ZNF717:NM_001290208:exon5:c.2549C>T:p.T850I,ZNF717:NM_001290209:exon5:c.2399C>T:p.T800I									rs76757483	0	0.445	0.235	5.24	-3.19			1	1.72	0	0.004		0.92	-1.28	-2.543	0.488	1.102	9.495
chr3	75786230	C	T	het	2	0.0869565	exonic	ZNF717	synonymous SNV	ZNF717:NM_001128223:exon5:c.2544G>A:p.R848R,ZNF717:NM_001290208:exon5:c.2544G>A:p.R848R,ZNF717:NM_001290209:exon5:c.2394G>A:p.R798R									rs2118755																			ID=COSM1485474;OCCURENCE=1(breast)
chr3	75786243	C	T	het	16	0.695652	exonic	ZNF717	nonsynonymous SNV	ZNF717:NM_001128223:exon5:c.2531G>A:p.C844Y,ZNF717:NM_001290208:exon5:c.2531G>A:p.C844Y,ZNF717:NM_001290209:exon5:c.2381G>A:p.C794Y									rs139633377	0.01	1	1	-1.94	0.518			1	3.55	0	0.77		5.69	0.202	3.803	0.423	2.226	13.4
chr3	75786244	A	T	het	3	0.130435	exonic	ZNF717	nonsynonymous SNV	ZNF717:NM_001128223:exon5:c.2530T>A:p.C844S,ZNF717:NM_001290208:exon5:c.2530T>A:p.C844S,ZNF717:NM_001290209:exon5:c.2380T>A:p.C794S									rs201924124	0.01	1	1	-1.95	1.46			1	3.6	0	0.779		7.07	0.959	6.263	0.445	2.809	15.35
chr3	75786245	T	A	het	16	0.695652	exonic	ZNF717	nonsynonymous SNV	ZNF717:NM_001128223:exon5:c.2529A>T:p.R843S,ZNF717:NM_001290208:exon5:c.2529A>T:p.R843S,ZNF717:NM_001290209:exon5:c.2379A>T:p.R793S									rs149660902	0.17	0	0.003	2.5	-1.65			0.811	0.185	0	0.015		0.098	-0.344	-3.35	0.48	0.761	8.026
chr3	75786252	G	T	het	17	0.73913	exonic	ZNF717	nonsynonymous SNV	ZNF717:NM_001128223:exon5:c.2522C>A:p.P841H,ZNF717:NM_001290208:exon5:c.2522C>A:p.P841H,ZNF717:NM_001290209:exon5:c.2372C>A:p.P791H									rs79138891	0	1	0.981	2.27	1.59			1	2.715	0	0.118		9.288	1.242	1.244	0.519	2.44	14.12
chr3	75786256	T	A	het	18	0.782609	exonic	ZNF717	stopgain	ZNF717:NM_001128223:exon5:c.2518A>T:p.K840X,ZNF717:NM_001290208:exon5:c.2518A>T:p.K840X,ZNF717:NM_001290209:exon5:c.2368A>T:p.K790X									rs113251431	1	0	0	0	1.59			1	0	0	0	6.5059	7.316	1.02	2.954	0	6.506	37
chr3	75786258	T	C	het	1	0.0434783	exonic	ZNF717	nonsynonymous SNV	ZNF717:NM_001128223:exon5:c.2516A>G:p.E839G,ZNF717:NM_001290208:exon5:c.2516A>G:p.E839G,ZNF717:NM_001290209:exon5:c.2366A>G:p.E789G										0.02	0.265	0.287	1.66	0.353			1	1.445	0	0.072		4.976	0.118	3.945	0.509	1.435	10.74
chr3	75786261	C	T	het	15	0.652174	exonic	ZNF717	nonsynonymous SNV	ZNF717:NM_001128223:exon5:c.2513G>A:p.G838E,ZNF717:NM_001290208:exon5:c.2513G>A:p.G838E,ZNF717:NM_001290209:exon5:c.2363G>A:p.G788E									rs78738705	0.02	0.984	0.842	1.78	0.663			1	0.76	0	0.068		5.876	0.256	1.569	0.372	2.657	14.84
chr3	75786278	A	C	het	20	0.869565	exonic	ZNF717	nonsynonymous SNV	ZNF717:NM_001128223:exon5:c.2496T>G:p.H832Q,ZNF717:NM_001290208:exon5:c.2496T>G:p.H832Q,ZNF717:NM_001290209:exon5:c.2346T>G:p.H782Q									rs79811623	0	0.738	0.672	-2.18	0.372			1	3.595	0	0.747		4.797	0.124	0.275	0.504	1.222	9.956
chr3	75786280	G	A	het	1	0.0434783	exonic	ZNF717	nonsynonymous SNV	ZNF717:NM_001128223:exon5:c.2494C>T:p.H832Y,ZNF717:NM_001290208:exon5:c.2494C>T:p.H832Y,ZNF717:NM_001290209:exon5:c.2344C>T:p.H782Y										0.01	0.885	0.744	-2.17	0.865			1	3.595	0	0.755		5.58	0.329	3.149	0.469	1.572	11.21
chr3	75786288	A	G	het	14	0.608696	exonic	ZNF717	nonsynonymous SNV	ZNF717:NM_001128223:exon5:c.2486T>C:p.L829P,ZNF717:NM_001290208:exon5:c.2486T>C:p.L829P,ZNF717:NM_001290209:exon5:c.2336T>C:p.L779P									rs76707683	0	1	1	1.64	0.446			0.986	3.48	0	0.216		5.268	0.134	4.688	0.548	2.009	12.68	ID=COSM1191698;OCCURENCE=1(central_nervous_system)
chr3	75786290	T	G	het	1	0.0434783	exonic	ZNF717	nonsynonymous SNV	ZNF717:NM_001128223:exon5:c.2484A>C:p.K828N,ZNF717:NM_001290208:exon5:c.2484A>C:p.K828N,ZNF717:NM_001290209:exon5:c.2334A>C:p.K778N										0.64	0.133	0.049	2.55	-3.54			1	-1.255	0	0.008		2.92	-2.29	-6.191	0.272	-1.595	0.014
chr3	75786298	T	C	het	14	0.608696	exonic	ZNF717	nonsynonymous SNV	ZNF717:NM_001128223:exon5:c.2476A>G:p.K826E,ZNF717:NM_001290208:exon5:c.2476A>G:p.K826E,ZNF717:NM_001290209:exon5:c.2326A>G:p.K776E									rs76137150	0.3	0.875	0.402	2.32	0.572			1	1.32	0	0.033		4.917	0.176	0.245	0.4	2.051	12.81
chr3	75786302	G	A	het	14	0.608696	exonic	ZNF717	synonymous SNV	ZNF717:NM_001128223:exon5:c.2472C>T:p.S824S,ZNF717:NM_001290208:exon5:c.2472C>T:p.S824S,ZNF717:NM_001290209:exon5:c.2322C>T:p.S774S									rs80001478																			ID=COSM1425318;OCCURENCE=1(large_intestine)
chr3	75786315	CTACATTCT	-	het	7	0.304348	exonic	ZNF717	nonframeshift deletion	ZNF717:NM_001128223:exon5:c.2451_2459del:p.817_820del,ZNF717:NM_001290208:exon5:c.2451_2459del:p.817_820del,ZNF717:NM_001290209:exon5:c.2301_2309del:p.767_770del									rs146447046																			ID=COSM1425319;OCCURENCE=43(large_intestine)
chr3	75786337	G	A	het	7	0.304348	exonic	ZNF717	nonsynonymous SNV	ZNF717:NM_001128223:exon5:c.2437C>T:p.P813S,ZNF717:NM_001290208:exon5:c.2437C>T:p.P813S,ZNF717:NM_001290209:exon5:c.2287C>T:p.P763S									rs147075123	0.05	1	0.989	1.61	1.79			1	1.915	0	0.151		9.718	1.367	4.853	0.485	2.133	13.09	ID=COSM1618047;OCCURENCE=1(liver)
chr3	75786354	G	A	het	15	0.652174	exonic	ZNF717	nonsynonymous SNV	ZNF717:NM_001128223:exon5:c.2420C>T:p.T807I,ZNF717:NM_001290208:exon5:c.2420C>T:p.T807I,ZNF717:NM_001290209:exon5:c.2270C>T:p.T757I									rs77045598	1	0.008	0.027	2.14	-0.695			1	0.325	0	0.021		5.176	-0.195	-0.119	0.326	-0.941	0.358	ID=COSM1618048;OCCURENCE=1(liver)
chr3	75786355	T	A	het	4	0.173913	exonic	ZNF717	nonsynonymous SNV	ZNF717:NM_001128223:exon5:c.2419A>T:p.T807S,ZNF717:NM_001290208:exon5:c.2419A>T:p.T807S,ZNF717:NM_001290209:exon5:c.2269A>T:p.T757S									rs80256387	0.05	0.011	0.04	2.15	1.79			0	0.625	0	0.034		7.667	1.12	0.483	0.315	3.062	16.22	ID=COSM1173001;OCCURENCE=1(oesophagus)
chr3	75786379	T	C	het	16	0.695652	exonic	ZNF717	nonsynonymous SNV	ZNF717:NM_001128223:exon5:c.2395A>G:p.T799A,ZNF717:NM_001290208:exon5:c.2395A>G:p.T799A,ZNF717:NM_001290209:exon5:c.2245A>G:p.T749A									rs80170761	0.14	0.041	0.015	2.5	0.509			1	0.2	0	0.017		4.801	0.16	-3.097	0.263	-0.128	3.371
chr3	75786381	T	C	het	11	0.478261	exonic	ZNF717	nonsynonymous SNV	ZNF717:NM_001128223:exon5:c.2393A>G:p.K798R,ZNF717:NM_001290208:exon5:c.2393A>G:p.K798R,ZNF717:NM_001290209:exon5:c.2243A>G:p.K748R									rs3009024	0.53	0.596	0.168	2.39	1.79			1	0.03	0	0.017		7.667	1.12	-2.368	0.352	0.115	4.621	ID=COSM149422;OCCURENCE=1(stomach)
chr3	75786385	C	G	het	17	0.73913	exonic	ZNF717	nonsynonymous SNV	ZNF717:NM_001128223:exon5:c.2389G>C:p.D797H,ZNF717:NM_001290208:exon5:c.2389G>C:p.D797H,ZNF717:NM_001290209:exon5:c.2239G>C:p.D747H									rs74494321	0.62	0	0	2.48	-1.83			1	0.525	0	0.015		0.808	-0.986	-3.982	0.28	-1.218	0.063
chr3	75786387	T	C	het	3	0.130435	exonic	ZNF717	nonsynonymous SNV	ZNF717:NM_001128223:exon5:c.2387A>G:p.Y796C,ZNF717:NM_001290208:exon5:c.2387A>G:p.Y796C,ZNF717:NM_001290209:exon5:c.2237A>G:p.Y746C									rs77304443	0.19	0.991	0.907	2.19	0.434			1	-0.045	0	0.041		2.583	0.139	-3.605	0.506	0.224	5.207
chr3	75786403	A	T	het	2	0.0869565	exonic	ZNF717	nonsynonymous SNV	ZNF717:NM_001128223:exon5:c.2371T>A:p.C791S,ZNF717:NM_001290208:exon5:c.2371T>A:p.C791S,ZNF717:NM_001290209:exon5:c.2221T>A:p.C741S									rs76634974	0.01	1	0.997	-2.04	1.92			0	3.06	0	0.748		7.913	1.18	6.128	0.402	3.331	17.21	ID=COSM1425321;OCCURENCE=1(large_intestine)
chr3	75786415	C	T	het	3	0.130435	exonic	ZNF717	nonsynonymous SNV	ZNF717:NM_001128223:exon5:c.2359G>A:p.E787K,ZNF717:NM_001290208:exon5:c.2359G>A:p.E787K,ZNF717:NM_001290209:exon5:c.2209G>A:p.E737K									rs77511709	0.89	0.261	0.071	2.16	1.92			0	-0.995	0	0.013		5.802	1.441	-2.698	0.481	1.008	9.117
chr3	75786417	T	C	het	15	0.652174	exonic	ZNF717	nonsynonymous SNV	ZNF717:NM_001128223:exon5:c.2357A>G:p.Y786C,ZNF717:NM_001290208:exon5:c.2357A>G:p.Y786C,ZNF717:NM_001290209:exon5:c.2207A>G:p.Y736C									rs77452946	0.02	1	0.994	1.8	0.302			1	2.205	0	0.123		5.118	0.071	-0.744	0.364	2.209	13.34
chr3	75786421	G	T	het	1	0.0434783	exonic	ZNF717	nonsynonymous SNV	ZNF717:NM_001128223:exon5:c.2353C>A:p.P785T,ZNF717:NM_001290208:exon5:c.2353C>A:p.P785T,ZNF717:NM_001290209:exon5:c.2203C>A:p.P735T									rs75202392	0	0.997	0.888	1.59	0.718			1	2.015	0	0.134		7.7	0.269	3.062	0.399	2.607	14.68
chr3	75786423	-	TC	het	2	0.0869565	exonic	ZNF717	frameshift insertion	ZNF717:NM_001128223:exon5:c.2350_2351insGA:p.K784fs,ZNF717:NM_001290208:exon5:c.2350_2351insGA:p.K784fs,ZNF717:NM_001290209:exon5:c.2200_2201insGA:p.K734fs																												ID=COSM1425322;OCCURENCE=1(large_intestine)
chr3	75786430	C	T	het	2	0.0869565	exonic	ZNF717	nonsynonymous SNV	ZNF717:NM_001128223:exon5:c.2344G>A:p.G782R,ZNF717:NM_001290208:exon5:c.2344G>A:p.G782R,ZNF717:NM_001290209:exon5:c.2194G>A:p.G732R									rs370627469	0.02	1	0.992	1.75	-0.254			1	2.055	0	0.12		5.935	-0.052	1.911	0.504	2.303	13.66
chr3	75786438	G	A	het	13	0.565217	exonic	ZNF717	nonsynonymous SNV	ZNF717:NM_001128223:exon5:c.2336C>T:p.T779I,ZNF717:NM_001290208:exon5:c.2336C>T:p.T779I,ZNF717:NM_001290209:exon5:c.2186C>T:p.T729I									rs79994093	1	0.232	0.058	2.14	0.309			1	0.93	0	0.025		5.38	0.092	-0.719	0.285	-1.772	0.01	ID=COSM1425323;OCCURENCE=1(liver),1(large_intestine)
chr3	75786450	G	A	het	12	0.521739	exonic	ZNF717	nonsynonymous SNV	ZNF717:NM_001128223:exon5:c.2324C>T:p.T775M,ZNF717:NM_001290208:exon5:c.2324C>T:p.T775M,ZNF717:NM_001290209:exon5:c.2174C>T:p.T725M									rs77097895	0.14	0.004	0.005	2.23	-3.48			1	0.615	0	0.023		5.455	-2.537	-8.124	0.358	-1.011	0.244	ID=COSM1618050;OCCURENCE=1(liver)
chr3	75786453	C	T	het	14	0.608696	exonic	ZNF717	nonsynonymous SNV	ZNF717:NM_001128223:exon5:c.2321G>A:p.S774N,ZNF717:NM_001290208:exon5:c.2321G>A:p.S774N,ZNF717:NM_001290209:exon5:c.2171G>A:p.S724N									rs77961859	0.59	0	0	2.22	-3.48			1	0.15	0	0.017		5.377	-2.996	-1.825	0.219	-1.215	0.065
chr3	75786469	G	A	het	3	0.130435	exonic	ZNF717	nonsynonymous SNV	ZNF717:NM_001128223:exon5:c.2305C>T:p.H769Y,ZNF717:NM_001290208:exon5:c.2305C>T:p.H769Y,ZNF717:NM_001290209:exon5:c.2155C>T:p.H719Y									rs113197025	1	0.566	0.022	2.46	-0.386			1	0.48	0	0.013		0.643	-0.081	-4.95	0.323	-1.617	0.013
chr3	75786476	G	A	het	3	0.130435	exonic	ZNF717	synonymous SNV	ZNF717:NM_001128223:exon5:c.2298C>T:p.T766T,ZNF717:NM_001290208:exon5:c.2298C>T:p.T766T,ZNF717:NM_001290209:exon5:c.2148C>T:p.T716T									rs111381670
chr3	75786483	C	A	het	1	0.0434783	exonic	ZNF717	nonsynonymous SNV	ZNF717:NM_001128223:exon5:c.2291G>T:p.G764V,ZNF717:NM_001290208:exon5:c.2291G>T:p.G764V,ZNF717:NM_001290209:exon5:c.2141G>T:p.G714V									rs112630759	0	0.996	0.913	1.97	0.819			1	2.65	0	0.111		6.44	0.32	1.462	0.355	2.28	13.58
chr3	75786490	C	G	het	5	0.217391	exonic	ZNF717	nonsynonymous SNV	ZNF717:NM_001128223:exon5:c.2284G>C:p.E762Q,ZNF717:NM_001290208:exon5:c.2284G>C:p.E762Q,ZNF717:NM_001290209:exon5:c.2134G>C:p.E712Q									rs113382015	0.28	0.975	0.654	2.21	1.74			1	-0.105	0	0.029		9.616	1.331	0.612	0.492	-1.408	0.022
chr3	75786500	A	G	het	10	0.434783	exonic	ZNF717	synonymous SNV	ZNF717:NM_001128223:exon5:c.2274T>C:p.Y758Y,ZNF717:NM_001290208:exon5:c.2274T>C:p.Y758Y,ZNF717:NM_001290209:exon5:c.2124T>C:p.Y708Y									rs74184035
chr3	75786500	AT	GA	het	2	0.0869565	exonic	ZNF717	nonframeshift substitution	ZNF717:NM_001128223:exon5:c.2273_2274TC,ZNF717:NM_001290208:exon5:c.2273_2274TC,ZNF717:NM_001290209:exon5:c.2123_2124TC
chr3	75786506	T	C	het	13	0.565217	exonic	ZNF717	synonymous SNV	ZNF717:NM_001128223:exon5:c.2268A>G:p.K756K,ZNF717:NM_001290208:exon5:c.2268A>G:p.K756K,ZNF717:NM_001290209:exon5:c.2118A>G:p.K706K									rs79902440																			ID=COSM1618051;OCCURENCE=1(liver)
chr3	75786515	G	A	het	18	0.782609	exonic	ZNF717	synonymous SNV	ZNF717:NM_001128223:exon5:c.2259C>T:p.T753T,ZNF717:NM_001290208:exon5:c.2259C>T:p.T753T,ZNF717:NM_001290209:exon5:c.2109C>T:p.T703T									rs74637771
chr3	75786518	A	C	het	9	0.391304	exonic	ZNF717	nonsynonymous SNV	ZNF717:NM_001128223:exon5:c.2256T>G:p.H752Q,ZNF717:NM_001290208:exon5:c.2256T>G:p.H752Q,ZNF717:NM_001290209:exon5:c.2106T>G:p.H702Q									rs113078821	0	0.997	0.99	-0.24	0.647			1	2.495	0	0.425		5.865	0.229	0.985	0.525	2.61	14.69
chr3	75786521	G	A	het	10	0.434783	exonic	ZNF717	synonymous SNV	ZNF717:NM_001128223:exon5:c.2253C>T:p.T751T,ZNF717:NM_001290208:exon5:c.2253C>T:p.T751T,ZNF717:NM_001290209:exon5:c.2103C>T:p.T701T									rs76396775
chr3	75786533	T	G	het	15	0.652174	exonic	ZNF717	synonymous SNV	ZNF717:NM_001128223:exon5:c.2241A>C:p.V747V,ZNF717:NM_001290208:exon5:c.2241A>C:p.V747V,ZNF717:NM_001290209:exon5:c.2091A>C:p.V697V									rs79051543																			ID=COSM1618052;OCCURENCE=1(liver)
chr3	75786555	-	TG	het	18	0.782609	exonic	ZNF717	frameshift insertion	ZNF717:NM_001128223:exon5:c.2218_2219insCA:p.C740fs,ZNF717:NM_001290208:exon5:c.2218_2219insCA:p.C740fs,ZNF717:NM_001290209:exon5:c.2068_2069insCA:p.C690fs									rs77245454
chr3	75786572	T	C	het	17	0.73913	exonic	ZNF717	synonymous SNV	ZNF717:NM_001128223:exon5:c.2202A>G:p.A734A,ZNF717:NM_001290208:exon5:c.2202A>G:p.A734A,ZNF717:NM_001290209:exon5:c.2052A>G:p.A684A									rs78845529
chr3	75786586	G	T	het	1	0.0434783	exonic	ZNF717	nonsynonymous SNV	ZNF717:NM_001128223:exon5:c.2188C>A:p.P730T,ZNF717:NM_001290208:exon5:c.2188C>A:p.P730T,ZNF717:NM_001290209:exon5:c.2038C>A:p.P680T									rs201102396	0.03	0	0.001	3.49	0.685			0	2.11	0	0.021		7.251	0.262	0.554	0.395	2.333	13.76
chr3	75786593	C	A	het	1	0.0434783	exonic	ZNF717	synonymous SNV	ZNF717:NM_001128223:exon5:c.2181G>T:p.G727G,ZNF717:NM_001290208:exon5:c.2181G>T:p.G727G,ZNF717:NM_001290209:exon5:c.2031G>T:p.G677G									rs76794459
chr3	75786597	C	T	het	19	0.826087	exonic	ZNF717	nonsynonymous SNV	ZNF717:NM_001128223:exon5:c.2177G>A:p.R726Q,ZNF717:NM_001290208:exon5:c.2177G>A:p.R726Q,ZNF717:NM_001290209:exon5:c.2027G>A:p.R676Q									rs76585055	0	0	0	3.48	-3.5			1	-1.06	0	0.006		2.73	-1.956	-6.646	0.34	0.849	8.432
chr3	75786598	G	A	het	1	0.0434783	exonic	ZNF717	nonsynonymous SNV	ZNF717:NM_001128223:exon5:c.2176C>T:p.R726W,ZNF717:NM_001290208:exon5:c.2176C>T:p.R726W,ZNF717:NM_001290209:exon5:c.2026C>T:p.R676W									rs74881355	0.01	0	0	3.41	0.841			0	0.205	0	0.013		6.746	0.324	1.699	0.455	1.575	11.22
chr3	75786607	C	T	het	17	0.73913	exonic	ZNF717	nonsynonymous SNV	ZNF717:NM_001128223:exon5:c.2167G>A:p.V723I,ZNF717:NM_001290208:exon5:c.2167G>A:p.V723I,ZNF717:NM_001290209:exon5:c.2017G>A:p.V673I									rs113494751	0.08	0.826	0.125	3.47	0.841			1	0.345	0	0.009		7.533	0.334	-0.034	0.211	1.532	11.08
chr3	75786608	C	T	het	2	0.0869565	exonic	ZNF717	synonymous SNV	ZNF717:NM_001128223:exon5:c.2166G>A:p.K722K,ZNF717:NM_001290208:exon5:c.2166G>A:p.K722K,ZNF717:NM_001290209:exon5:c.2016G>A:p.K672K									rs78623446
chr3	75786610	T	A	het	1	0.0434783	exonic	ZNF717	stopgain	ZNF717:NM_001128223:exon5:c.2164A>T:p.K722X,ZNF717:NM_001290208:exon5:c.2164A>T:p.K722X,ZNF717:NM_001290209:exon5:c.2014A>T:p.K672X										0.27	0	0	0	1.75			1	0	0	0	6.41148	7.595	1.09	1.224	0	6.411	37
chr3	75786619	T	C	het	12	0.521739	exonic	ZNF717	nonsynonymous SNV	ZNF717:NM_001128223:exon5:c.2155A>G:p.R719G,ZNF717:NM_001290208:exon5:c.2155A>G:p.R719G,ZNF717:NM_001290209:exon5:c.2005A>G:p.R669G									rs77250491	0.29	0	0.001	3.44	-3.21			1	0.6	0	0.009		1.237	-2.37	-1.043	0.371	-0.509	1.672
chr3	75786620	G	A	het	2	0.0869565	exonic	ZNF717	synonymous SNV	ZNF717:NM_001128223:exon5:c.2154C>T:p.F718F,ZNF717:NM_001290208:exon5:c.2154C>T:p.F718F,ZNF717:NM_001290209:exon5:c.2004C>T:p.F668F									rs144106206
chr3	75786623	G	T	het	18	0.782609	exonic	ZNF717	synonymous SNV	ZNF717:NM_001128223:exon5:c.2151C>A:p.I717I,ZNF717:NM_001290208:exon5:c.2151C>A:p.I717I,ZNF717:NM_001290209:exon5:c.2001C>A:p.I667I									rs78134363
chr3	75786628	G	C	het	6	0.26087	exonic	ZNF717	nonsynonymous SNV	ZNF717:NM_001128223:exon5:c.2146C>G:p.Q716E,ZNF717:NM_001290208:exon5:c.2146C>G:p.Q716E,ZNF717:NM_001290209:exon5:c.1996C>G:p.Q666E				0.001		0.002			rs3009023	0.04	0.207	0.101	3.55	1.61			0.999	1.745	0	0.007		9.312	1.249	-0.133	0.355	0.332	5.802	ID=COSM149423;OCCURENCE=1(stomach)
chr3	75786662	A	T	het	2	0.0869565	exonic	ZNF717	nonsynonymous SNV	ZNF717:NM_001128223:exon5:c.2112T>A:p.N704K,ZNF717:NM_001290208:exon5:c.2112T>A:p.N704K,ZNF717:NM_001290209:exon5:c.1962T>A:p.N654K									rs202184453	1	0.743	0.264	3.46	1.57			0	1.535	0	0.013		7.274	1.007	6.284	0.321	0.863	8.494
chr3	75786670	G	A	het	17	0.73913	exonic	ZNF717	nonsynonymous SNV	ZNF717:NM_001128223:exon5:c.2104C>T:p.P702S,ZNF717:NM_001290208:exon5:c.2104C>T:p.P702S,ZNF717:NM_001290209:exon5:c.1954C>T:p.P652S									rs80089603	0.06	0.588	0.118	3.45	0.281			1	0.78	0	0.011		6.406	0.088	6.618	0.402	2.344	13.8
chr3	75786672	C	T	het	2	0.0869565	exonic	ZNF717	nonsynonymous SNV	ZNF717:NM_001128223:exon5:c.2102G>A:p.S701N,ZNF717:NM_001290208:exon5:c.2102G>A:p.S701N,ZNF717:NM_001290209:exon5:c.1952G>A:p.S651N									rs200017345	0.03	0.001	0.003	3.5	-2.03			0	-0.305	0	0.008		6.417	-0.759	-0.654	0.209	0.651	7.495
chr3	75786681	G	A	het	19	0.826087	exonic	ZNF717	nonsynonymous SNV	ZNF717:NM_001128223:exon5:c.2093C>T:p.P698L,ZNF717:NM_001290208:exon5:c.2093C>T:p.P698L,ZNF717:NM_001290209:exon5:c.1943C>T:p.P648L									rs75784751	0	0	0	3.55	-2.53			0	-1.395	0	0.005		3.133	-1.95	-7.316	0.392	0.366	5.989
chr3	75786684	G	T	het	2	0.0869565	exonic	ZNF717	nonsynonymous SNV	ZNF717:NM_001128223:exon5:c.2090C>A:p.T697K,ZNF717:NM_001290208:exon5:c.2090C>A:p.T697K,ZNF717:NM_001290209:exon5:c.1940C>A:p.T647K									rs201345045	0	0.999	0.965	3.49	0.715			0	1.21	0	0.031		6.145	0.256	3.759	0.486	1.494	10.94
chr3	75786687	A	T	het	7	0.304348	exonic	ZNF717	nonsynonymous SNV	ZNF717:NM_001128223:exon5:c.2087T>A:p.L696H,ZNF717:NM_001290208:exon5:c.2087T>A:p.L696H,ZNF717:NM_001290209:exon5:c.1937T>A:p.L646H									rs80214016	0.01	0.001	0.001	3.33	-1.62			1	0.17	0	0.011		2.239	-0.465	-0.548	0.396	0.368	5.999	ID=COSM1425324;OCCURENCE=1(large_intestine)
chr3	75786722	A	-	het	1	0.0434783	exonic	ZNF717	frameshift deletion	ZNF717:NM_001128223:exon5:c.2052delT:p.F684fs,ZNF717:NM_001290208:exon5:c.2052delT:p.F684fs,ZNF717:NM_001290209:exon5:c.1902delT:p.F634fs
chr3	75786737	A	T	het	18	0.782609	exonic	ZNF717	nonsynonymous SNV	ZNF717:NM_001128223:exon5:c.2037T>A:p.N679K,ZNF717:NM_001290208:exon5:c.2037T>A:p.N679K,ZNF717:NM_001290209:exon5:c.1887T>A:p.N629K									rs78297221	0.16	0.493	0.034	3.5	1.57			0	1.055	0	0		7.274	1.007	6.119	0.327	2.009	12.68	ID=COSM1425325;OCCURENCE=1(large_intestine)
chr3	75786740	CA	GG	het	11	0.478261	exonic	ZNF717	nonframeshift substitution	ZNF717:NM_001128223:exon5:c.2033_2034CC,ZNF717:NM_001290208:exon5:c.2033_2034CC,ZNF717:NM_001290209:exon5:c.1883_1884CC
chr3	75786741	A	G	het	13	0.565217	exonic	ZNF717	nonsynonymous SNV	ZNF717:NM_001128223:exon5:c.2033T>C:p.M678T,ZNF717:NM_001290208:exon5:c.2033T>C:p.M678T,ZNF717:NM_001290209:exon5:c.1883T>C:p.M628T									rs79103664	0.5	0.011	0.007	3.17	-2.35			1	-0.05	0	0.01		5.111	-0.437	-5.897	0.467	-0.21	2.98	ID=COSM1425326;OCCURENCE=1(large_intestine)
chr3	75786744	A	-	het	2	0.0869565	exonic	ZNF717	frameshift deletion	ZNF717:NM_001128223:exon5:c.2030delT:p.V677fs,ZNF717:NM_001290208:exon5:c.2030delT:p.V677fs,ZNF717:NM_001290209:exon5:c.1880delT:p.V627fs																												ID=COSM1618053;OCCURENCE=1(liver)
chr3	75786754	G	T	het	16	0.695652	exonic	ZNF717	nonsynonymous SNV	ZNF717:NM_001128223:exon5:c.2020C>A:p.R674S,ZNF717:NM_001290208:exon5:c.2020C>A:p.R674S,ZNF717:NM_001290209:exon5:c.1870C>A:p.R624S									rs77394685	0.07	0.005	0.002	2.9	0.65			1	0.09	0	0.015		6.136	0.252	4.891	0.415	1.456	10.81
chr3	75786759	T	C	het	18	0.782609	exonic	ZNF717	nonsynonymous SNV	ZNF717:NM_001128223:exon5:c.2015A>G:p.K672R,ZNF717:NM_001290208:exon5:c.2015A>G:p.K672R,ZNF717:NM_001290209:exon5:c.1865A>G:p.K622R									rs75759940	0	0.003	0.003	3.16	-3.14			1	-0.66	0	0.008		4.75	-1.861	-0.144	0.327	0.845	8.413
chr3	75786764	-	T	het	5	0.217391	exonic	ZNF717	frameshift insertion	ZNF717:NM_001128223:exon5:c.2009_2010insA:p.T670fs,ZNF717:NM_001290208:exon5:c.2009_2010insA:p.T670fs,ZNF717:NM_001290209:exon5:c.1859_1860insA:p.T620fs									rs139062880
chr3	75786773	T	A	het	18	0.782609	exonic	ZNF717	nonsynonymous SNV	ZNF717:NM_001128223:exon5:c.2001A>T:p.R667S,ZNF717:NM_001290208:exon5:c.2001A>T:p.R667S,ZNF717:NM_001290209:exon5:c.1851A>T:p.R617S									rs76175438	0.01	0.89	0.451	2.96	0.405			1	2.965	0	0.045		5.213	0.127	-1.802	0.468	1.519	11.03
chr3	75786784	T	C	het	17	0.73913	exonic	ZNF717	nonsynonymous SNV	ZNF717:NM_001128223:exon5:c.1990A>G:p.I664V,ZNF717:NM_001290208:exon5:c.1990A>G:p.I664V,ZNF717:NM_001290209:exon5:c.1840A>G:p.I614V									rs78490340	0.64	0	0	3.12	-3.42			1	0.015	0	0.009		3.576	-1.214	-1.667	0.189	-2.273	0.004
chr3	75786802	G	A	het	17	0.73913	exonic	ZNF717	nonsynonymous SNV	ZNF717:NM_001128223:exon5:c.1972C>T:p.R658C,ZNF717:NM_001290208:exon5:c.1972C>T:p.R658C,ZNF717:NM_001290209:exon5:c.1822C>T:p.R608C									rs77826574	0.2	0.994	0.387	5.42	0.774			1	1.355	0	0.003		2.5	0.291	-3.025	0.447	0.648	7.478
chr3	75786817	C	A	het	1	0.0434783	exonic	ZNF717	stopgain	ZNF717:NM_001128223:exon5:c.1957G>T:p.G653X,ZNF717:NM_001290208:exon5:c.1957G>T:p.G653X,ZNF717:NM_001290209:exon5:c.1807G>T:p.G603X									rs75032682	0.04	0	0	0	0.789			1	0	0	0	6.80639	6.395	0.303	2.052	0	6.806	38
chr3	75786827	A	T	het	16	0.695652	exonic	ZNF717	stopgain	ZNF717:NM_001128223:exon5:c.1947T>A:p.C649X,ZNF717:NM_001290208:exon5:c.1947T>A:p.C649X,ZNF717:NM_001290209:exon5:c.1797T>A:p.C599X									rs79635065	1	0	0	0	1.71			1	0	0	0	6.2196	3.984	1.073	0.059	0	6.22	37
chr3	75786845	T	-	het	1	0.0434783	exonic	ZNF717	frameshift deletion	ZNF717:NM_001128223:exon5:c.1929delA:p.G643fs,ZNF717:NM_001290208:exon5:c.1929delA:p.G643fs,ZNF717:NM_001290209:exon5:c.1779delA:p.G593fs
chr3	75786854	A	T	het	15	0.652174	exonic	ZNF717	synonymous SNV	ZNF717:NM_001128223:exon5:c.1920T>A:p.T640T,ZNF717:NM_001290208:exon5:c.1920T>A:p.T640T,ZNF717:NM_001290209:exon5:c.1770T>A:p.T590T									rs76921234
chr3	75786866	G	T	het	18	0.782609	exonic	ZNF717	synonymous SNV	ZNF717:NM_001128223:exon5:c.1908C>A:p.T636T,ZNF717:NM_001290208:exon5:c.1908C>A:p.T636T,ZNF717:NM_001290209:exon5:c.1758C>A:p.T586T									rs79516801
chr3	75786892	A	C	het	19	0.826087	exonic	ZNF717	nonsynonymous SNV	ZNF717:NM_001128223:exon5:c.1882T>G:p.F628V,ZNF717:NM_001290208:exon5:c.1882T>G:p.F628V,ZNF717:NM_001290209:exon5:c.1732T>G:p.F578V									rs76826286	0	1	0.987	0.84	1.9			1	3.52	0	0.353		7.88	1.165	6.323	0.51	3.023	16.08
chr3	75786899	T	C	het	19	0.826087	exonic	ZNF717	synonymous SNV	ZNF717:NM_001128223:exon5:c.1875A>G:p.G625G,ZNF717:NM_001290208:exon5:c.1875A>G:p.G625G,ZNF717:NM_001290209:exon5:c.1725A>G:p.G575G									rs78828372
chr3	75786910	T	C	het	2	0.0869565	exonic	ZNF717	nonsynonymous SNV	ZNF717:NM_001128223:exon5:c.1864A>G:p.N622D,ZNF717:NM_001290208:exon5:c.1864A>G:p.N622D,ZNF717:NM_001290209:exon5:c.1714A>G:p.N572D									rs200631700	0.32	0.004	0.004	3.2	0.67			1	-0.49	0	0.008		1.86	0.21	-3.761	0.284	2.192	13.29
chr3	75786916	C	A	het	19	0.826087	exonic	ZNF717	stopgain	ZNF717:NM_001128223:exon5:c.1858G>T:p.E620X,ZNF717:NM_001290208:exon5:c.1858G>T:p.E620X,ZNF717:NM_001290209:exon5:c.1708G>T:p.E570X									rs78906544	1	0	0	0	-0.035			1	0	0	0	5.62048	2.21	-0.007	-3.13	0	5.62	36
chr3	75786919	A	T	het	19	0.826087	exonic	ZNF717	nonsynonymous SNV	ZNF717:NM_001128223:exon5:c.1855T>A:p.Y619N,ZNF717:NM_001290208:exon5:c.1855T>A:p.Y619N,ZNF717:NM_001290209:exon5:c.1705T>A:p.Y569N									rs77101176	0	0.998	0.933	1.78	1.9			1	2.96	0	0.162		7.88	1.165	2.821	0.452	3.035	16.13
chr3	75786921	G	A	het	4	0.173913	exonic	ZNF717	nonsynonymous SNV	ZNF717:NM_001128223:exon5:c.1853C>T:p.P618L,ZNF717:NM_001290208:exon5:c.1853C>T:p.P618L,ZNF717:NM_001290209:exon5:c.1703C>T:p.P568L										0.05	0.999	0.802	1.66	1.9			1	2.565	0	0.142		9.977	1.423	3.875	0.424	2.99	15.97
chr3	75786942	C	A	het	2	0.0869565	exonic	ZNF717	nonsynonymous SNV	ZNF717:NM_001128223:exon5:c.1832G>T:p.R611I,ZNF717:NM_001290208:exon5:c.1832G>T:p.R611I,ZNF717:NM_001290209:exon5:c.1682G>T:p.R561I	0.0008				0.001				rs2918517	0.05	0.577	0.161	4.29	-0.239			1	0	0	0.007		4.08	-0.048	-0.01	0.135	2.649	14.82
chr3	75786965	C	T	het	15	0.652174	exonic	ZNF717	synonymous SNV	ZNF717:NM_001128223:exon5:c.1809G>A:p.K603K,ZNF717:NM_001290208:exon5:c.1809G>A:p.K603K,ZNF717:NM_001290209:exon5:c.1659G>A:p.K553K									rs76347222
chr3	75786991	C	T	het	16	0.695652	exonic	ZNF717	nonsynonymous SNV	ZNF717:NM_001128223:exon5:c.1783G>A:p.E595K,ZNF717:NM_001290208:exon5:c.1783G>A:p.E595K,ZNF717:NM_001290209:exon5:c.1633G>A:p.E545K									rs76496075	0.05	0.87	0.559	3.2	0.993			1	1.11	0	0.024		6.443	0.389	-0.57	0.38	2.298	13.64
chr3	75786993	T	A	het	7	0.304348	exonic	ZNF717	nonsynonymous SNV	ZNF717:NM_001128223:exon5:c.1781A>T:p.N594I,ZNF717:NM_001290208:exon5:c.1781A>T:p.N594I,ZNF717:NM_001290209:exon5:c.1631A>T:p.N544I									rs149887072	0.15	0.934	0.61	3.18	-2.88			1	1.66	0	0.025		3.943	-0.642	-1.944	0.375	1.873	12.22
chr3	75787015	C	T	het	18	0.782609	exonic	ZNF717	nonsynonymous SNV	ZNF717:NM_001128223:exon5:c.1759G>A:p.G587S,ZNF717:NM_001290208:exon5:c.1759G>A:p.G587S,ZNF717:NM_001290209:exon5:c.1609G>A:p.G537S									rs76263679	0	1	0.999	1.82	1.76			1	2.255	0	0.141		9.659	1.343	1.075	0.46	3.57	18.19	ID=COSM1173002;OCCURENCE=1(oesophagus)
chr3	75787032	T	C	het	17	0.73913	exonic	ZNF717	nonsynonymous SNV	ZNF717:NM_001128223:exon5:c.1742A>G:p.H581R,ZNF717:NM_001290208:exon5:c.1742A>G:p.H581R,ZNF717:NM_001290209:exon5:c.1592A>G:p.H531R									rs76729736	0.01	0.035	0.038	-2.18	0.513			1	4.015	0	0.691		5.415	0.158	2.178	0.467	1.068	9.361
chr3	75787043	G	A	het	19	0.826087	exonic	ZNF717	synonymous SNV	ZNF717:NM_001128223:exon5:c.1731C>T:p.F577F,ZNF717:NM_001290208:exon5:c.1731C>T:p.F577F,ZNF717:NM_001290209:exon5:c.1581C>T:p.F527F									rs78806516
chr3	75787047	-	ACTTATA	het	8	0.347826	exonic	ZNF717	stopgain	ZNF717:NM_001128223:exon5:c.1726_1727insTATAAGT:p.S576_F577delinsLX,ZNF717:NM_001290208:exon5:c.1726_1727insTATAAGT:p.S576_F577delinsLX,ZNF717:NM_001290209:exon5:c.1576_1577insTATAAGT:p.S526_F527delinsLX
chr3	75787049	C	A	het	1	0.0434783	exonic	ZNF717	nonsynonymous SNV	ZNF717:NM_001128223:exon5:c.1725G>T:p.K575N,ZNF717:NM_001290208:exon5:c.1725G>T:p.K575N,ZNF717:NM_001290209:exon5:c.1575G>T:p.K525N									rs62250106	0.64	0.901	0.206	2.56	0.788			1	1.425	0	0.019		2.36	0.294	-2.846	0.212	-0.359	2.305
chr3	75787057	G	A	het	17	0.73913	exonic	ZNF717	nonsynonymous SNV	ZNF717:NM_001128223:exon5:c.1717C>T:p.H573Y,ZNF717:NM_001290208:exon5:c.1717C>T:p.H573Y,ZNF717:NM_001290209:exon5:c.1567C>T:p.H523Y									rs62250107	0.47	0	0.001	3.19	-3.53			1	-1	0	0.006		0.261	-0.866	-3.891	0.246	-1.792	0.01
chr3	75787081	A	T	het	18	0.782609	exonic	ZNF717	nonsynonymous SNV	ZNF717:NM_001128223:exon5:c.1693T>A:p.C565S,ZNF717:NM_001290208:exon5:c.1693T>A:p.C565S,ZNF717:NM_001290209:exon5:c.1543T>A:p.C515S									rs77378861	0	0.889	0.869	-1.95	1.76			1	3.61	0	0.763		7.618	1.101	4.68	0.404	2.803	15.33
chr3	75787091	T	G	het	2	0.0869565	exonic	ZNF717	nonsynonymous SNV	ZNF717:NM_001128223:exon5:c.1683A>C:p.K561N,ZNF717:NM_001290208:exon5:c.1683A>C:p.K561N,ZNF717:NM_001290209:exon5:c.1533A>C:p.K511N										0.01	0.999	0.987	1.76	-1.09			1	1.56	0	0.101		5.469	-0.201	-0.202	0.263	2.091	12.95
chr3	75787099	CT	-	het	10	0.434783	exonic	ZNF717	frameshift deletion	ZNF717:NM_001128223:exon5:c.1674_1675del:p.T558fs,ZNF717:NM_001290208:exon5:c.1674_1675del:p.T558fs,ZNF717:NM_001290209:exon5:c.1524_1525del:p.T508fs									rs74340838																			ID=COSM1192025;OCCURENCE=2(large_intestine),1(central_nervous_system)
chr3	75787116	T	G	het	18	0.782609	exonic	ZNF717	nonsynonymous SNV	ZNF717:NM_001128223:exon5:c.1658A>C:p.H553P,ZNF717:NM_001290208:exon5:c.1658A>C:p.H553P,ZNF717:NM_001290209:exon5:c.1508A>C:p.H503P									rs77490669	0	1	1	-2.18	1.92			1	4.005	0	0.833		7.916	1.189	5.572	0.559	2.829	15.42
chr3	75787127	G	T	het	17	0.73913	exonic	ZNF717	stopgain	ZNF717:NM_001128223:exon5:c.1647C>A:p.Y549X,ZNF717:NM_001290208:exon5:c.1647C>A:p.Y549X,ZNF717:NM_001290209:exon5:c.1497C>A:p.Y499X									rs74740396	1	0	0	0	-3.85			1	0	0	0	4.95201	2.952	-0.987	-0.643	0	4.952	28.8
chr3	75787145	T	C	het	19	0.826087	exonic	ZNF717	synonymous SNV	ZNF717:NM_001128223:exon5:c.1629A>G:p.T543T,ZNF717:NM_001290208:exon5:c.1629A>G:p.T543T,ZNF717:NM_001290209:exon5:c.1479A>G:p.T493T									rs79560192
chr3	75787159	C	T	het	20	0.869565	exonic	ZNF717	nonsynonymous SNV	ZNF717:NM_001128223:exon5:c.1615G>A:p.E539K,ZNF717:NM_001290208:exon5:c.1615G>A:p.E539K,ZNF717:NM_001290209:exon5:c.1465G>A:p.E489K									rs77322475	0.08	0.236	0.014	3.2	-3.59			1	0.635	0	0.011		0.971	-1.049	-1.278	0.371	1.043	9.26	ID=COSM1425334;OCCURENCE=1(large_intestine)
chr3	75787169	G	A	het	18	0.782609	exonic	ZNF717	synonymous SNV	ZNF717:NM_001128223:exon5:c.1605C>T:p.Y535Y,ZNF717:NM_001290208:exon5:c.1605C>T:p.Y535Y,ZNF717:NM_001290209:exon5:c.1455C>T:p.Y485Y									rs73843011
chr3	75787174	G	T	het	2	0.0869565	exonic	ZNF717	nonsynonymous SNV	ZNF717:NM_001128223:exon5:c.1600C>A:p.P534T,ZNF717:NM_001290208:exon5:c.1600C>A:p.P534T,ZNF717:NM_001290209:exon5:c.1450C>A:p.P484T									rs200945611	0.02	0.998	0.895	2.31	1.79			1	2.505	0	0.099		9.722	1.379	3.866	0.47	3.162	16.58
chr3	75787179	T	C	het	1	0.0434783	exonic	ZNF717	nonsynonymous SNV	ZNF717:NM_001128223:exon5:c.1595A>G:p.E532G,ZNF717:NM_001290208:exon5:c.1595A>G:p.E532G,ZNF717:NM_001290209:exon5:c.1445A>G:p.E482G										0.01	0.999	0.981	1.66	1.79			1	2.24	0	0.161		7.671	1.13	3.939	0.478	2.357	13.84
chr3	75787186	C	T	het	18	0.782609	exonic	ZNF717	nonsynonymous SNV	ZNF717:NM_001128223:exon5:c.1588G>A:p.A530T,ZNF717:NM_001290208:exon5:c.1588G>A:p.A530T,ZNF717:NM_001290209:exon5:c.1438G>A:p.A480T									rs73843012	1	0	0	2.79	0.537			0	-1.965	0	0.005		5.577	0.158	1.121	0.254	-0.723	0.898
chr3	75787194	C	T	het	2	0.0869565	exonic	ZNF717	nonsynonymous SNV	ZNF717:NM_001128223:exon5:c.1580G>A:p.R527K,ZNF717:NM_001290208:exon5:c.1580G>A:p.R527K,ZNF717:NM_001290209:exon5:c.1430G>A:p.R477K									rs202060190	0.17	0.837	0.365	2.22	0.879			1	0.15	0	0.022		6.469	0.362	-0.049	0.317	2.486	14.27
chr3	75787199	A	C	het	3	0.130435	exonic	ZNF717	nonsynonymous SNV	ZNF717:NM_001128223:exon5:c.1575T>G:p.H525Q,ZNF717:NM_001290208:exon5:c.1575T>G:p.H525Q,ZNF717:NM_001290209:exon5:c.1425T>G:p.H475Q									rs138214171	0	1	0.987	-2.18	1.79			0	3.815	0	0.819		7.671	1.13	0.991	0.428	2.399	13.98
chr3	75787202	G	T	het	4	0.173913	exonic	ZNF717	synonymous SNV	ZNF717:NM_001128223:exon5:c.1572C>A:p.V524V,ZNF717:NM_001290208:exon5:c.1572C>A:p.V524V,ZNF717:NM_001290209:exon5:c.1422C>A:p.V474V									rs76713735
chr3	75787204	C	A	het	5	0.217391	exonic	ZNF717	nonsynonymous SNV	ZNF717:NM_001128223:exon5:c.1570G>T:p.V524F,ZNF717:NM_001290208:exon5:c.1570G>T:p.V524F,ZNF717:NM_001290209:exon5:c.1420G>T:p.V474F									rs75063165	0.34	0.888	0.346	3.18	-3.58			1	1.18	0	0.014		4.138	-1.068	-1.364	0.416	0.583	7.147
chr3	75787208	G	A	het	4	0.173913	exonic	ZNF717	synonymous SNV	ZNF717:NM_001128223:exon5:c.1566C>T:p.L522L,ZNF717:NM_001290208:exon5:c.1566C>T:p.L522L,ZNF717:NM_001290209:exon5:c.1416C>T:p.L472L									rs79982156
chr3	75787218	T	A	het	1	0.0434783	exonic	ZNF717	nonsynonymous SNV	ZNF717:NM_001128223:exon5:c.1556A>T:p.K519M,ZNF717:NM_001290208:exon5:c.1556A>T:p.K519M,ZNF717:NM_001290209:exon5:c.1406A>T:p.K469M									rs201606605	0.16	0.991	0.582	2.52	1.79			1	1.93	0	0.044		7.671	1.13	-1.026	0.45	1.721	11.71
chr3	75787221	C	T	het	2	0.0869565	exonic	ZNF717	nonsynonymous SNV	ZNF717:NM_001128223:exon5:c.1553G>A:p.C518Y,ZNF717:NM_001290208:exon5:c.1553G>A:p.C518Y,ZNF717:NM_001290209:exon5:c.1403G>A:p.C468Y									rs79089658	1	0.001	0	3.31	-1.19			1	-0.84	0	0.005		2.435	-0.201	-0.667	0.343	-2.392	0.003
chr3	75787221	CA	TG	het	1	0.0434783	exonic	ZNF717	nonframeshift substitution	ZNF717:NM_001128223:exon5:c.1552_1553CA,ZNF717:NM_001290208:exon5:c.1552_1553CA,ZNF717:NM_001290209:exon5:c.1402_1403CA
chr3	75787222	A	G	het	5	0.217391	exonic	ZNF717	nonsynonymous SNV	ZNF717:NM_001128223:exon5:c.1552T>C:p.C518R,ZNF717:NM_001290208:exon5:c.1552T>C:p.C518R,ZNF717:NM_001290209:exon5:c.1402T>C:p.C468R									rs78680336	0.56	0	0	3.21	-0.593			1	-0.87	0	0.007		2.786	-0.086	-0.759	0.332	-1.903	0.008
chr3	75787224	C	T	het	9	0.391304	exonic	ZNF717	nonsynonymous SNV	ZNF717:NM_001128223:exon5:c.1550G>A:p.R517H,ZNF717:NM_001290208:exon5:c.1550G>A:p.R517H,ZNF717:NM_001290209:exon5:c.1400G>A:p.R467H									rs112847134	0.37	0	0	3.13	-3.58			1	1.045	0	0.013		0.637	-1.222	-3.625	0.215	0.122	4.656
chr3	75787236	C	T	het	1	0.0434783	exonic	ZNF717	nonsynonymous SNV	ZNF717:NM_001128223:exon5:c.1538G>A:p.G513E,ZNF717:NM_001290208:exon5:c.1538G>A:p.G513E,ZNF717:NM_001290209:exon5:c.1388G>A:p.G463E									rs113151880	0.06	1	0.99	3.24	1.9			0	1.295	0	0.042		9.961	1.438	2.791	0.332	3.334	17.22
chr3	75787240	A	G	het	9	0.391304	exonic	ZNF717	nonsynonymous SNV	ZNF717:NM_001128223:exon5:c.1534T>C:p.C512R,ZNF717:NM_001290208:exon5:c.1534T>C:p.C512R,ZNF717:NM_001290209:exon5:c.1384T>C:p.C462R									rs76111663	0	0.997	0.976	-2.05	1.9			1	3.78	0	0.786		7.866	1.177	4.73	0.312	2.892	15.63
chr3	75787269	G	A	het	1	0.0434783	exonic	ZNF717	nonsynonymous SNV	ZNF717:NM_001128223:exon5:c.1505C>T:p.T502I,ZNF717:NM_001290208:exon5:c.1505C>T:p.T502I,ZNF717:NM_001290209:exon5:c.1355C>T:p.T452I										0.02	1	0.989	1.78	0.935			1	2.35	0	0.14		7.468	0.365	1.027	0.364	2.96	15.87
chr3	75787273	G	T	het	1	0.0434783	exonic	ZNF717	nonsynonymous SNV	ZNF717:NM_001128223:exon5:c.1501C>A:p.H501N,ZNF717:NM_001290208:exon5:c.1501C>A:p.H501N,ZNF717:NM_001290209:exon5:c.1351C>A:p.H451N									rs77118311	0.01	0.999	0.996	-0.26	1.9			1	3.16	0	0.515		9.961	1.438	4.945	0.331	3.444	17.66
chr3	75787279	A	T	het	6	0.26087	exonic	ZNF717	nonsynonymous SNV	ZNF717:NM_001128223:exon5:c.1495T>A:p.W499R,ZNF717:NM_001290208:exon5:c.1495T>A:p.W499R,ZNF717:NM_001290209:exon5:c.1345T>A:p.W449R									rs80214832	1	0	0	2.73	-3.79			0.998	-3.075	0	0.004		2.459	-3.25	-0.513	0.236	-2.102	0.006
chr3	75787288	T	C	het	7	0.304348	exonic	ZNF717	nonsynonymous SNV	ZNF717:NM_001128223:exon5:c.1486A>G:p.I496V,ZNF717:NM_001290208:exon5:c.1486A>G:p.I496V,ZNF717:NM_001290209:exon5:c.1336A>G:p.I446V									rs76815006	0.32	0	0.001	2.27	-2.91			1	0.805	0	0.023		5.622	-1.466	-3.412	0.221	-2.15	0.005
chr3	75787298	T	C	het	5	0.217391	exonic	ZNF717	synonymous SNV	ZNF717:NM_001128223:exon5:c.1476A>G:p.S492S,ZNF717:NM_001290208:exon5:c.1476A>G:p.S492S,ZNF717:NM_001290209:exon5:c.1326A>G:p.S442S									rs113907537
chr3	75787302	T	C	het	2	0.0869565	exonic	ZNF717	nonsynonymous SNV	ZNF717:NM_001128223:exon5:c.1472A>G:p.K491R,ZNF717:NM_001290208:exon5:c.1472A>G:p.K491R,ZNF717:NM_001290209:exon5:c.1322A>G:p.K441R									rs201966533	0.67	0.077	0.007	5.2	-1.48			1	0.755	0	0.003		2.415	-0.256	-4.872	0.246	-0.278	2.668
chr3	75787313	C	G	het	1	0.0434783	exonic	ZNF717	synonymous SNV	ZNF717:NM_001128223:exon5:c.1461G>C:p.T487T,ZNF717:NM_001290208:exon5:c.1461G>C:p.T487T,ZNF717:NM_001290209:exon5:c.1311G>C:p.T437T									rs372030153
chr3	75787317	T	A	het	2	0.0869565	exonic	ZNF717	nonsynonymous SNV	ZNF717:NM_001128223:exon5:c.1457A>T:p.K486I,ZNF717:NM_001290208:exon5:c.1457A>T:p.K486I,ZNF717:NM_001290209:exon5:c.1307A>T:p.K436I									rs148436228	0	0.995	0.982	1.62	0.856			0.864	3.4	0	0.215		5.54	0.282	1.172	0.453	2.445	14.14
chr3	75787321	C	T	het	1	0.0434783	exonic	ZNF717	nonsynonymous SNV	ZNF717:NM_001128223:exon5:c.1453G>A:p.G485R,ZNF717:NM_001290208:exon5:c.1453G>A:p.G485R,ZNF717:NM_001290209:exon5:c.1303G>A:p.G435R									rs202223162	0.02	1	0.947	5.43	1.16			0	2.93	0	0.013		6.523	0.477	2.045	0.398	3.533	18.03
chr3	75787372	A	T	het	13	0.565217	exonic	ZNF717	nonsynonymous SNV	ZNF717:NM_001128223:exon5:c.1402T>A:p.L468I,ZNF717:NM_001290208:exon5:c.1402T>A:p.L468I,ZNF717:NM_001290209:exon5:c.1252T>A:p.L418I									rs62250108	0.22	0	0.001	2.26	-4.14			1	-0.61	0	0		0.758	-2.128	-5.32	0.228	-0.62	1.247
chr3	75787382	T	C	het	12	0.521739	exonic	ZNF717	synonymous SNV	ZNF717:NM_001128223:exon5:c.1392A>G:p.S464S,ZNF717:NM_001290208:exon5:c.1392A>G:p.S464S,ZNF717:NM_001290209:exon5:c.1242A>G:p.S414S									rs3009014
chr3	75787405	C	T	het	15	0.652174	exonic	ZNF717	nonsynonymous SNV	ZNF717:NM_001128223:exon5:c.1369G>A:p.G457R,ZNF717:NM_001290208:exon5:c.1369G>A:p.G457R,ZNF717:NM_001290209:exon5:c.1219G>A:p.G407R									rs73843014	0.01	0.965	0.688	4.84	-0.948			1	2.155	0	0.012		6.088	-0.228	3.856	0.303	2.486	14.27	ID=COSM1618058;OCCURENCE=1(liver)
chr3	75787416	C	T	het	11	0.478261	exonic	ZNF717	nonsynonymous SNV	ZNF717:NM_001128223:exon5:c.1358G>A:p.C453Y,ZNF717:NM_001290208:exon5:c.1358G>A:p.C453Y,ZNF717:NM_001290209:exon5:c.1208G>A:p.C403Y									rs10442977	0	1	0.996	-1.94	2.07			1	3.485	0	0.787		10.339	1.54	5.447	0.374	2.862	15.53	ID=COSM1618059;OCCURENCE=1(liver)
chr3	75787424	C	G	het	16	0.695652	exonic	ZNF717	synonymous SNV	ZNF717:NM_001128223:exon5:c.1350G>C:p.P450P,ZNF717:NM_001290208:exon5:c.1350G>C:p.P450P,ZNF717:NM_001290209:exon5:c.1200G>C:p.P400P									rs62250109
chr3	75787427	T	C	het	15	0.652174	exonic	ZNF717	synonymous SNV	ZNF717:NM_001128223:exon5:c.1347A>G:p.K449K,ZNF717:NM_001290208:exon5:c.1347A>G:p.K449K,ZNF717:NM_001290209:exon5:c.1197A>G:p.K399K									rs76082496																			ID=COSM1618060;OCCURENCE=1(liver)
chr3	75787458	G	A	het	8	0.347826	exonic	ZNF717	nonsynonymous SNV	ZNF717:NM_001128223:exon5:c.1316C>T:p.T439I,ZNF717:NM_001290208:exon5:c.1316C>T:p.T439I,ZNF717:NM_001290209:exon5:c.1166C>T:p.T389I									rs76333414	0.64	0.709	0.32	3.15	-0.861			1	0.77	0	0.013		4.944	-0.203	-2.08	0.346	-0.441	1.95
chr3	75787464	C	T	het	16	0.695652	exonic	ZNF717	nonsynonymous SNV	ZNF717:NM_001128223:exon5:c.1310G>A:p.R437K,ZNF717:NM_001290208:exon5:c.1310G>A:p.R437K,ZNF717:NM_001290209:exon5:c.1160G>A:p.R387K									rs74861398	0.93	0.041	0.055	3.21	-3.2			1	0.06	0	0.009		3.615	-0.943	-1.224	0.242	-0.768	0.764	ID=COSM324546;OCCURENCE=1(lung)
chr3	75787474	G	A	het	1	0.0434783	exonic	ZNF717	nonsynonymous SNV	ZNF717:NM_001128223:exon5:c.1300C>T:p.H434Y,ZNF717:NM_001290208:exon5:c.1300C>T:p.H434Y,ZNF717:NM_001290209:exon5:c.1150C>T:p.H384Y									rs202070324	1	0.961	0.66	2.25	-3.49			1	0.335	0	0.022		3.197	-0.985	-1.895	0.302	-0.762	0.783
chr3	75787476	C	T	het	8	0.347826	exonic	ZNF717	nonsynonymous SNV	ZNF717:NM_001128223:exon5:c.1298G>A:p.S433N,ZNF717:NM_001290208:exon5:c.1298G>A:p.S433N,ZNF717:NM_001290209:exon5:c.1148G>A:p.S383N									rs113228636	0.26	0.874	0.437	3.18	-3.49			1	1.515	0	0.02		5.639	-1.573	-3.276	0.256	-0.037	3.827
chr3	75787486	C	T	het	18	0.782609	exonic	ZNF717	nonsynonymous SNV	ZNF717:NM_001128223:exon5:c.1288G>A:p.E430K,ZNF717:NM_001290208:exon5:c.1288G>A:p.E430K,ZNF717:NM_001290209:exon5:c.1138G>A:p.E380K									rs77649281	1	0	0	5.45	1.75			0.985	-1.61	0	0.001		5.34	0.178	2.199	0.316	0.245	5.326	ID=COSM324547;OCCURENCE=1(lung)
chr3	75787490	A	T	het	1	0.0434783	exonic	ZNF717	stopgain	ZNF717:NM_001128223:exon5:c.1284T>A:p.C428X,ZNF717:NM_001290208:exon5:c.1284T>A:p.C428X,ZNF717:NM_001290209:exon5:c.1134T>A:p.C378X									rs201399274	1	0	0	0	1.75			0	0	0	0	5.5761	7.623	1.112	0.804	0	5.576	35	ID=COSM1618061;OCCURENCE=1(liver)
chr3	75787516	C	G	het	18	0.782609	exonic	ZNF717	nonsynonymous SNV	ZNF717:NM_001128223:exon5:c.1258G>C:p.E420Q,ZNF717:NM_001290208:exon5:c.1258G>C:p.E420Q,ZNF717:NM_001290209:exon5:c.1108G>C:p.E370Q									rs79870536	0.01	0.955	0.617	1.77	0.939			1	1.395	0	0.069		8.218	0.377	3.809	0.464	3.04	16.14
chr3	75787519	CT	AG	het	8	0.347826	exonic	ZNF717	nonframeshift substitution	ZNF717:NM_001128223:exon5:c.1254_1255CT,ZNF717:NM_001290208:exon5:c.1254_1255CT,ZNF717:NM_001290209:exon5:c.1104_1105CT
chr3	75787520	T	G	het	1	0.0434783	exonic	ZNF717	synonymous SNV	ZNF717:NM_001128223:exon5:c.1254A>C:p.T418T,ZNF717:NM_001290208:exon5:c.1254A>C:p.T418T,ZNF717:NM_001290209:exon5:c.1104A>C:p.T368T									rs76264776
chr3	75787546	G	C	het	1	0.0434783	exonic	ZNF717	nonsynonymous SNV	ZNF717:NM_001128223:exon5:c.1228C>G:p.L410V,ZNF717:NM_001290208:exon5:c.1228C>G:p.L410V,ZNF717:NM_001290209:exon5:c.1078C>G:p.L360V									rs193921040	0.01	1	0.982	0.64	1.73			0.981	2.51	0	0.278		9.62	1.326	2.122	0.394	2.013	12.69		CLINSIG=unknown;CLNDBN=Malignant_tumor_of_prostate;CLNREVSTAT=single;CLNACC=RCV000149058.1;CLNDSDB=MedGen:OMIM:Orphanet:SNOMED_CT;CLNDSDBID=C0376358:176807:ORPHA1331:399068003
chr3	75787576	A	G	het	1	0.0434783	exonic	ZNF717	nonsynonymous SNV	ZNF717:NM_001128223:exon5:c.1198T>C:p.C400R,ZNF717:NM_001290208:exon5:c.1198T>C:p.C400R,ZNF717:NM_001290209:exon5:c.1048T>C:p.C350R									rs75313615	0	0.999	0.945	-2.05	0.775			0	4.115	0	0.79		5.644	0.24	4.717	0.343	2.385	13.93
chr3	75787620	T	C	het	2	0.0869565	exonic	ZNF717	nonsynonymous SNV	ZNF717:NM_001128223:exon5:c.1154A>G:p.H385R,ZNF717:NM_001290208:exon5:c.1154A>G:p.H385R,ZNF717:NM_001290209:exon5:c.1004A>G:p.H335R									rs75737034	0.01	1	0.957	-2.18	1.92			0	3.9	0	0.821		7.908	1.189	2.021	0.371	2.409	14.01
chr3	75787637	C	T	het	18	0.782609	exonic	ZNF717	synonymous SNV	ZNF717:NM_001128223:exon5:c.1137G>A:p.K379K,ZNF717:NM_001290208:exon5:c.1137G>A:p.K379K,ZNF717:NM_001290209:exon5:c.987G>A:p.K329K									rs28632074
chr3	75787646	AA	-	het	9	0.391304	exonic	ZNF717	frameshift deletion	ZNF717:NM_001128223:exon5:c.1127_1128del:p.F376fs,ZNF717:NM_001290208:exon5:c.1127_1128del:p.F376fs,ZNF717:NM_001290209:exon5:c.977_978del:p.F326fs									rs67579270																			ID=COSM236333;OCCURENCE=1(liver),5(autonomic_ganglia)
chr3	75787679	T	C	het	18	0.782609	exonic	ZNF717	synonymous SNV	ZNF717:NM_001128223:exon5:c.1095A>G:p.K365K,ZNF717:NM_001290208:exon5:c.1095A>G:p.K365K,ZNF717:NM_001290209:exon5:c.945A>G:p.K315K									rs74620322
chr3	75787688	T	A	het	18	0.782609	exonic	ZNF717	synonymous SNV	ZNF717:NM_001128223:exon5:c.1086A>T:p.T362T,ZNF717:NM_001290208:exon5:c.1086A>T:p.T362T,ZNF717:NM_001290209:exon5:c.936A>T:p.T312T									rs77688099
chr3	75787702	C	G	het	19	0.826087	exonic	ZNF717	nonsynonymous SNV	ZNF717:NM_001128223:exon5:c.1072G>C:p.E358Q,ZNF717:NM_001290208:exon5:c.1072G>C:p.E358Q,ZNF717:NM_001290209:exon5:c.922G>C:p.E308Q									rs62250110	1	0	0	2.26	1.58			0.455	-0.645	0	0		7.923	0.275	-0.707	0.233	-1.972	0.007
chr3	75787726	G	A	het	11	0.478261	exonic	ZNF717	nonsynonymous SNV	ZNF717:NM_001128223:exon5:c.1048C>T:p.R350C,ZNF717:NM_001290208:exon5:c.1048C>T:p.R350C,ZNF717:NM_001290209:exon5:c.898C>T:p.R300C									rs1962893	0.18	0.997	0.688	2.36	1.58			1	1.76	0	0.002		5.246	1.248	-0.869	0.428	1.112	9.535
chr3	75787728	C	T	het	4	0.173913	exonic	ZNF717	nonsynonymous SNV	ZNF717:NM_001128223:exon5:c.1046G>A:p.R349H,ZNF717:NM_001290208:exon5:c.1046G>A:p.R349H,ZNF717:NM_001290209:exon5:c.896G>A:p.R299H									rs75074846	0.21	0	0	2.24	-3.17			1	1.33	0	0.026		0.463	-1.147	-7.61	0.247	-0.952	0.338
chr3	75787732	A	C	het	15	0.652174	exonic	ZNF717	nonsynonymous SNV	ZNF717:NM_001128223:exon5:c.1042T>G:p.F348V,ZNF717:NM_001290208:exon5:c.1042T>G:p.F348V,ZNF717:NM_001290209:exon5:c.892T>G:p.F298V									rs74776730	0	0.979	0.894	0.88	1.58			1	3.495	0	0.274		7.303	1.025	4.745	0.388	1.904	12.32
chr3	75787739	A	T	het	1	0.0434783	exonic	ZNF717	synonymous SNV	ZNF717:NM_001128223:exon5:c.1035T>A:p.G345G,ZNF717:NM_001290208:exon5:c.1035T>A:p.G345G,ZNF717:NM_001290209:exon5:c.885T>A:p.G295G	0.0076	0.0029				0.0031			rs1962894
chr3	75787770	C	T	het	13	0.565217	exonic	ZNF717	nonsynonymous SNV	ZNF717:NM_001128223:exon5:c.1004G>A:p.G335E,ZNF717:NM_001290208:exon5:c.1004G>A:p.G335E,ZNF717:NM_001290209:exon5:c.854G>A:p.G285E									rs74873974	0.05	0.995	0.974	1.78	0.859			1	1.265	0	0.093		6.458	0.332	0.736	0.404	2.435	14.1	ID=COSM149424;OCCURENCE=1(stomach)
chr3	75787794	A	G	het	18	0.782609	exonic	ZNF717	nonsynonymous SNV	ZNF717:NM_001128223:exon5:c.980T>C:p.I327T,ZNF717:NM_001290208:exon5:c.980T>C:p.I327T,ZNF717:NM_001290209:exon5:c.830T>C:p.I277T									rs75467043	0.93	0	0	2.36	-3.18			1	-0.095	0	0.013		1.532	-2.649	-0.245	0.276	-2.298	0.004
chr3	75787829	C	G	het	9	0.391304	exonic	ZNF717	nonsynonymous SNV	ZNF717:NM_001128223:exon5:c.945G>C:p.W315C,ZNF717:NM_001290208:exon5:c.945G>C:p.W315C,ZNF717:NM_001290209:exon5:c.795G>C:p.W265C									rs77430797	0.01	0.79	0.074	2.47	-1.89			1	0.625	0	0.018		5.556	-0.529	-4.105	0.407	-0.347	2.36
chr3	75787840	C	A	het	3	0.130435	exonic	ZNF717	nonsynonymous SNV	ZNF717:NM_001128223:exon5:c.934G>T:p.A312S,ZNF717:NM_001290208:exon5:c.934G>T:p.A312S,ZNF717:NM_001290209:exon5:c.784G>T:p.A262S									rs78216937	0.11	0	0	2.46	-0.885			1	0.72	0	0.023		2.695	-0.26	-3.529	0.29	0.722	7.84
chr3	75787869	CA	TG	het	9	0.391304	exonic	ZNF717	nonframeshift substitution	ZNF717:NM_001128223:exon5:c.904_905CA,ZNF717:NM_001290208:exon5:c.904_905CA,ZNF717:NM_001290209:exon5:c.754_755CA
chr3	75787876	G	T	het	20	0.869565	exonic	ZNF717	nonsynonymous SNV	ZNF717:NM_001128223:exon5:c.898C>A:p.L300I,ZNF717:NM_001290208:exon5:c.898C>A:p.L300I,ZNF717:NM_001290209:exon5:c.748C>A:p.L250I									rs78514077	0.54	0	0	2.45	-2.51			1	0.195	0	0.018		5.546	-1.296	-3.245	0.217	-1.013	0.241
chr3	75787880	A	G	het	19	0.826087	exonic	ZNF717	synonymous SNV	ZNF717:NM_001128223:exon5:c.894T>C:p.L298L,ZNF717:NM_001290208:exon5:c.894T>C:p.L298L,ZNF717:NM_001290209:exon5:c.744T>C:p.L248L									rs78071099
chr3	75787897	T	C	het	19	0.826087	exonic	ZNF717	nonsynonymous SNV	ZNF717:NM_001128223:exon5:c.877A>G:p.I293V,ZNF717:NM_001290208:exon5:c.877A>G:p.I293V,ZNF717:NM_001290209:exon5:c.727A>G:p.I243V									rs77452021	0.28	0.103	0.022	2.47	1.26			1	0.695	0	0.023		3.459	0.869	0.209	0.321	-0.166	3.19
chr3	75787918	C	T	het	5	0.217391	exonic	ZNF717	nonsynonymous SNV	ZNF717:NM_001128223:exon5:c.856G>A:p.V286I,ZNF717:NM_001290208:exon5:c.856G>A:p.V286I,ZNF717:NM_001290209:exon5:c.706G>A:p.V236I									rs78153004	0.15	0	0.001	2.26	-3.47			1	0.58	0	0.02		1	-0.85	-3.897	0.189	0.564	7.05
chr3	75787926	T	C	het	5	0.217391	exonic	ZNF717	nonsynonymous SNV	ZNF717:NM_001128223:exon5:c.848A>G:p.Y283C,ZNF717:NM_001290208:exon5:c.848A>G:p.Y283C,ZNF717:NM_001290209:exon5:c.698A>G:p.Y233C									rs79067505	0.02	0.244	0.152	1.8	-3.2			1	1.755	0	0.047		0.249	-1.084	-0.533	0.393	0.911	8.705
chr3	75787927	A	-	het	1	0.0434783	exonic	ZNF717	frameshift deletion	ZNF717:NM_001128223:exon5:c.847delT:p.Y283fs,ZNF717:NM_001290208:exon5:c.847delT:p.Y283fs,ZNF717:NM_001290209:exon5:c.697delT:p.Y233fs
chr3	75787949	C	T	het	22	0.956522	exonic	ZNF717	synonymous SNV	ZNF717:NM_001128223:exon5:c.825G>A:p.Q275Q,ZNF717:NM_001290208:exon5:c.825G>A:p.Q275Q,ZNF717:NM_001290209:exon5:c.675G>A:p.Q225Q									rs76105745
chr3	75787961	A	G	het	20	0.869565	exonic	ZNF717	synonymous SNV	ZNF717:NM_001128223:exon5:c.813T>C:p.T271T,ZNF717:NM_001290208:exon5:c.813T>C:p.T271T,ZNF717:NM_001290209:exon5:c.663T>C:p.T221T									rs76334908
chr3	75787962	G	C	het	21	0.913043	exonic	ZNF717	nonsynonymous SNV	ZNF717:NM_001128223:exon5:c.812C>G:p.T271S,ZNF717:NM_001290208:exon5:c.812C>G:p.T271S,ZNF717:NM_001290209:exon5:c.662C>G:p.T221S									rs79540623	0.44	0.051	0.011	2.32	-0.049			1	0.42	0	0.021		5.668	0.004	-1.257	0.319	1.116	9.553	ID=COSM1173003;OCCURENCE=1(oesophagus)
chr3	75787996	C	T	het	20	0.869565	exonic	ZNF717	nonsynonymous SNV	ZNF717:NM_001128223:exon5:c.778G>A:p.G260R,ZNF717:NM_001290208:exon5:c.778G>A:p.G260R,ZNF717:NM_001290209:exon5:c.628G>A:p.G210R									rs78640256	0.1	0.999	0.889	3.49	-0.654			1	0.695	0	0.022		5.708	-0.18	1.681	0.478	3.022	16.08
chr3	75788010	A	C	hom	21	0.913043	exonic	ZNF717	nonsynonymous SNV	ZNF717:NM_001128223:exon5:c.764T>G:p.V255G,ZNF717:NM_001290208:exon5:c.764T>G:p.V255G,ZNF717:NM_001290209:exon5:c.614T>G:p.V205G									rs3009006	0.3	0	0	3.44	-2.56			1	0	0	0.008		3.294	-3.263	0.056	0.302	-0.057	3.725
chr3	75788023	C	T	het	20	0.869565	exonic	ZNF717	nonsynonymous SNV	ZNF717:NM_001128223:exon5:c.751G>A:p.V251I,ZNF717:NM_001290208:exon5:c.751G>A:p.V251I,ZNF717:NM_001290209:exon5:c.601G>A:p.V201I									rs76889571	0.37	0.001	0.001	3.48	-4.4			1	0.145	0	0.007		0.334	-2.471	-0.233	0.268	-0.522	1.618	ID=COSM1618063;OCCURENCE=1(liver)
chr3	75788028	G	A	het	1	0.0434783	exonic	ZNF717	nonsynonymous SNV	ZNF717:NM_001128223:exon5:c.746C>T:p.S249L,ZNF717:NM_001290208:exon5:c.746C>T:p.S249L,ZNF717:NM_001290209:exon5:c.596C>T:p.S199L									rs150689808	0.14	0.086	0.044	3.46	1.29			1	1.855	0	0.018		4.539	0.521	1.99	0.476	0.93	8.79
chr3	75788033	A	T	het	1	0.0434783	exonic	ZNF717	nonsynonymous SNV	ZNF717:NM_001128223:exon5:c.741T>A:p.N247K,ZNF717:NM_001290208:exon5:c.741T>A:p.N247K,ZNF717:NM_001290209:exon5:c.591T>A:p.N197K									rs75925645	0.36	0	0.001	3.49	-0.707			1	0.76	0	0.011		2.086	-0.098	-2.628	0.287	-0.249	2.801	ID=COSM1618065;OCCURENCE=1(liver)
chr3	75788040	G	A	het	1	0.0434783	exonic	ZNF717	nonsynonymous SNV	ZNF717:NM_001128223:exon5:c.734C>T:p.A245V,ZNF717:NM_001290208:exon5:c.734C>T:p.A245V,ZNF717:NM_001290209:exon5:c.584C>T:p.A195V									rs111880168	0.23	0.808	0.206	3.42	-1.69			1	1.615	0	0.016		5.441	-0.338	0.231	0.473	1.346	10.42
chr3	75788068	A	C	het	18	0.782609	exonic	ZNF717	nonsynonymous SNV	ZNF717:NM_001128223:exon5:c.706T>G:p.F236V,ZNF717:NM_001290208:exon5:c.706T>G:p.F236V,ZNF717:NM_001290209:exon5:c.556T>G:p.F186V									rs74357986	0.05	0.165	0.03	3.56	-3.88			1	-0.205	0	0.007		1.026	-1.309	1.224	0.359	1.04	9.247
chr3	75788076	A	C	het	21	0.913043	exonic	ZNF717	nonsynonymous SNV	ZNF717:NM_001128223:exon5:c.698T>G:p.V233G,ZNF717:NM_001290208:exon5:c.698T>G:p.V233G,ZNF717:NM_001290209:exon5:c.548T>G:p.V183G									rs62250111	1	0	0	3.59	0.011			0	-2.015	0	0.004		4.671	0.011	0.201	0.302	-2.05	0.006
chr3	75788085	A	G	het	1	0.0434783	exonic	ZNF717	nonsynonymous SNV	ZNF717:NM_001128223:exon5:c.689T>C:p.V230A,ZNF717:NM_001290208:exon5:c.689T>C:p.V230A,ZNF717:NM_001290209:exon5:c.539T>C:p.V180A									rs201605431	0.06	0.03	0.014	3.52	0.495			1	1.67	0	0.017		4.582	0.165	-0.769	0.267	0.721	7.838	ID=COSM1048483;OCCURENCE=1(endometrium)
chr3	75788088	C	T	het	14	0.608696	exonic	ZNF717	nonsynonymous SNV	ZNF717:NM_001128223:exon5:c.686G>A:p.R229K,ZNF717:NM_001290208:exon5:c.686G>A:p.R229K,ZNF717:NM_001290209:exon5:c.536G>A:p.R179K									rs77856895	0.21	0.053	0.012	3.42	-0.481			1	1.245	0	0.015		1.901	-0.116	0.029	0.266	0.578	7.121
chr3	75788105	C	T	het	1	0.0434783	exonic	ZNF717	nonsynonymous SNV	ZNF717:NM_001128223:exon5:c.669G>A:p.M223I,ZNF717:NM_001290208:exon5:c.669G>A:p.M223I,ZNF717:NM_001290209:exon5:c.519G>A:p.M173I										0.3	0	0	0.23	-3.88			1	-1.24	0	0.042		0.131	-1.373	0	0.278	-0.477	1.8
chr3	75788109	G	A	het	1	0.0434783	exonic	ZNF717	nonsynonymous SNV	ZNF717:NM_001128223:exon5:c.665C>T:p.A222V,ZNF717:NM_001290208:exon5:c.665C>T:p.A222V,ZNF717:NM_001290209:exon5:c.515C>T:p.A172V										0.02	0.001	0	0.15	-3.88			1	1.145	0	0.106		2.639	-0.941	0	0.341	1.404	10.63
chr3	75788115	G	A	het	21	0.913043	exonic	ZNF717	nonsynonymous SNV	ZNF717:NM_001128223:exon5:c.659C>T:p.T220M,ZNF717:NM_001290208:exon5:c.659C>T:p.T220M,ZNF717:NM_001290209:exon5:c.509C>T:p.T170M									rs62246570	0.22	0.996	0.445	0.13	-3.88			1	0.985	0	0.115		6.495	-1.345	0	0.324	-0.372	2.249
chr3	75788130	C	A	het	19	0.826087	exonic	ZNF717	nonsynonymous SNV	ZNF717:NM_001128223:exon5:c.644G>T:p.G215V,ZNF717:NM_001290208:exon5:c.644G>T:p.G215V,ZNF717:NM_001290209:exon5:c.494G>T:p.G165V									rs113708852	0.02	0.759	0.249	-0.21	-1.54			0.999	3.53	0	0.297		3.131	-0.359	0	0.36	0.824	8.322	ID=COSM236269;OCCURENCE=1(autonomic_ganglia)
chr3	75788145	T	A	het	2	0.0869565	exonic	ZNF717	nonsynonymous SNV	ZNF717:NM_001128223:exon5:c.629A>T:p.Q210L,ZNF717:NM_001290208:exon5:c.629A>T:p.Q210L,ZNF717:NM_001290209:exon5:c.479A>T:p.Q160L										0.03	0	0.001	0.25	-0.96			1	1.65	0	0.123		0.302	-0.169	0	0.367	0.812	8.267
chr3	75788152	T	C	het	14	0.608696	exonic	ZNF717	nonsynonymous SNV	ZNF717:NM_001128223:exon5:c.622A>G:p.T208A,ZNF717:NM_001290208:exon5:c.622A>G:p.T208A,ZNF717:NM_001290209:exon5:c.472A>G:p.T158A									rs148372120	0.07	0.001	0.001	0.21	1.16			1	0.345	0	0.003		4.31	0.063	0	0.372	1.053	9.303
chr3	75788156	C	T	het	6	0.26087	exonic	ZNF717	synonymous SNV	ZNF717:NM_001128223:exon5:c.618G>A:p.L206L,ZNF717:NM_001290208:exon5:c.618G>A:p.L206L,ZNF717:NM_001290209:exon5:c.468G>A:p.L156L									rs202056407
chr3	75788158	G	C	het	9	0.391304	exonic	ZNF717	nonsynonymous SNV	ZNF717:NM_001128223:exon5:c.616C>G:p.L206V,ZNF717:NM_001290208:exon5:c.616C>G:p.L206V,ZNF717:NM_001290209:exon5:c.466C>G:p.L156V									rs3009004	0.04	0.61	0.088	0.2	1.13			0.99	-0.64	0	0.062		7.923	0.447	0	0.349	0.957	8.902	ID=COSM149425;OCCURENCE=1(stomach)
chr3	75788165	T	C	het	5	0.217391	exonic	ZNF717	synonymous SNV	ZNF717:NM_001128223:exon5:c.609A>G:p.Q203Q,ZNF717:NM_001290208:exon5:c.609A>G:p.Q203Q,ZNF717:NM_001290209:exon5:c.459A>G:p.Q153Q									rs200778975
chr3	75788199	T	C	het	16	0.695652	exonic	ZNF717	nonsynonymous SNV	ZNF717:NM_001128223:exon5:c.575A>G:p.H192R,ZNF717:NM_001290208:exon5:c.575A>G:p.H192R,ZNF717:NM_001290209:exon5:c.425A>G:p.H142R									rs77110669	0.59	0.084	0.022	1.01	-3.85			1	-0.405	0	0.033		3.756	-1.218	-1.06	0.399	-0.627	1.221
chr3	75788217	G	A	het	4	0.173913	exonic	ZNF717	nonsynonymous SNV	ZNF717:NM_001128223:exon5:c.557C>T:p.T186I,ZNF717:NM_001290208:exon5:c.557C>T:p.T186I,ZNF717:NM_001290209:exon5:c.407C>T:p.T136I									rs200049185	0.04	0.068	0.014	0.2	-1.17			1	0.205	0	0.081		2.541	-0.277	-0.229	0.428	1.2	9.876
chr3	75788226	CA	AG	het	8	0.347826	exonic	ZNF717	nonframeshift substitution	ZNF717:NM_001128223:exon5:c.547_548CT,ZNF717:NM_001290208:exon5:c.547_548CT,ZNF717:NM_001290209:exon5:c.397_398CT
chr3	75788230	C	T	het	9	0.391304	exonic	ZNF717	nonsynonymous SNV	ZNF717:NM_001128223:exon5:c.544G>A:p.V182I,ZNF717:NM_001290208:exon5:c.544G>A:p.V182I,ZNF717:NM_001290209:exon5:c.394G>A:p.V132I										0.22	0.311	0.065	0.99	-0.989			1	0.795	0	0.054		2.636	-0.234	-2.858	0.318	1.062	9.338
chr3	75788245	C	T	het	17	0.73913	exonic	ZNF717	nonsynonymous SNV	ZNF717:NM_001128223:exon5:c.529G>A:p.G177R,ZNF717:NM_001290208:exon5:c.529G>A:p.G177R,ZNF717:NM_001290209:exon5:c.379G>A:p.G127R									rs79835104	0.12	0.991	0.885	-0.11	2.07			1	1.915	0	0.325		10.339	1.54	1.52	0.464	3.225	16.81
chr3	75788258	C	A	het	18	0.782609	exonic	ZNF717	synonymous SNV	ZNF717:NM_001128223:exon5:c.516G>T:p.G172G,ZNF717:NM_001290208:exon5:c.516G>T:p.G172G,ZNF717:NM_001290209:exon5:c.366G>T:p.G122G									rs79526626
chr3	75788273	G	T	het	4	0.173913	exonic	ZNF717	nonsynonymous SNV	ZNF717:NM_001128223:exon5:c.501C>A:p.F167L,ZNF717:NM_001290208:exon5:c.501C>A:p.F167L,ZNF717:NM_001290209:exon5:c.351C>A:p.F117L									rs77301061	0.73	0.003	0.002	0.96	-1.39			1	-0.055	0	0.039		3.926	-0.312	-0.099	0.26	-0.617	1.258		CLINSIG=untested;CLNDBN=Malignant_melanoma;CLNREVSTAT=not;CLNACC=RCV000066187.2;CLNDSDB=MedGen:SNOMED_CT;CLNDSDBID=C0025202:2092003
chr3	75788281	T	C	het	18	0.782609	exonic	ZNF717	nonsynonymous SNV	ZNF717:NM_001128223:exon5:c.493A>G:p.M165V,ZNF717:NM_001290208:exon5:c.493A>G:p.M165V,ZNF717:NM_001290209:exon5:c.343A>G:p.M115V									rs76243986	0.56	0	0	1.11	-4.14			1	0.075	0	0.041		5.125	-1.813	0.549	0.427	-0.562	1.463
chr3	75788291	AT	GA	het	14	0.608696	exonic	ZNF717	nonframeshift substitution	ZNF717:NM_001128223:exon5:c.482_483TC,ZNF717:NM_001290208:exon5:c.482_483TC,ZNF717:NM_001290209:exon5:c.332_333TC
chr3	75788292	T	A	het	16	0.695652	exonic	ZNF717	nonsynonymous SNV	ZNF717:NM_001128223:exon5:c.482A>T:p.D161V,ZNF717:NM_001290208:exon5:c.482A>T:p.D161V,ZNF717:NM_001290209:exon5:c.332A>T:p.D111V									rs73843015	0.19	0	0	1.04	-4.14			1	0.53	0	0.048		0.865	-1.763	-0.061	0.32	-0.601	1.316
chr3	75788303	C	T	het	7	0.304348	exonic	ZNF717	synonymous SNV	ZNF717:NM_001128223:exon5:c.471G>A:p.G157G,ZNF717:NM_001290208:exon5:c.471G>A:p.G157G,ZNF717:NM_001290209:exon5:c.321G>A:p.G107G									rs77400845
chr3	75788314	T	C	het	18	0.782609	exonic	ZNF717	nonsynonymous SNV	ZNF717:NM_001128223:exon5:c.460A>G:p.M154V,ZNF717:NM_001290208:exon5:c.460A>G:p.M154V,ZNF717:NM_001290209:exon5:c.310A>G:p.M104V									rs79381924	0.07	0.018	0.004	0.74	0.859			1	-0.395	0	0.052		5.521	0.28	-0.337	0.387	0.686	7.664
chr3	75788316	C	T	het	16	0.695652	exonic	ZNF717	nonsynonymous SNV	ZNF717:NM_001128223:exon5:c.458G>A:p.G153E,ZNF717:NM_001290208:exon5:c.458G>A:p.G153E,ZNF717:NM_001290209:exon5:c.308G>A:p.G103E									rs79165653	0.25	0.981	0.792	1	0.059			1	1.63	0	0.128		5.008	0.039	0.285	0.5	0.8	8.209	ID=COSM149426;OCCURENCE=1(stomach)
chr3	75788363	G	C	het	2	0.0869565	exonic	ZNF717	nonsynonymous SNV	ZNF717:NM_001128223:exon5:c.411C>G:p.N137K,ZNF717:NM_001290208:exon5:c.411C>G:p.N137K,ZNF717:NM_001290209:exon5:c.261C>G:p.N87K										0.79	0.144	0.021	1	-2.19			1	0.505	0	0.043		3.002	-0.497	-2.869	0.289	-1.313	0.035
chr3	75788366	C	A	het	18	0.782609	exonic	ZNF717	nonsynonymous SNV	ZNF717:NM_001128223:exon5:c.408G>T:p.L136F,ZNF717:NM_001290208:exon5:c.408G>T:p.L136F,ZNF717:NM_001290209:exon5:c.258G>T:p.L86F									rs80085410	0.7	0.176	0.078	-0.45	1.23			1	1.79	0	0.189		6.573	0.482	-1.552	0.456	-0.85	0.549
chr3	75788376	G	C	het	7	0.304348	exonic	ZNF717	nonsynonymous SNV	ZNF717:NM_001128223:exon5:c.398C>G:p.T133R,ZNF717:NM_001290208:exon5:c.398C>G:p.T133R,ZNF717:NM_001290209:exon5:c.248C>G:p.T83R									rs76943640	0.31	0.054	0.014	0.9	-1.06			1	1.5	0	0.07		2.772	-0.259	-3.601	0.468	0.263	5.421
chr3	75788377	T	-	het	1	0.0434783	exonic	ZNF717	frameshift deletion	ZNF717:NM_001128223:exon5:c.397delA:p.T133fs,ZNF717:NM_001290208:exon5:c.397delA:p.T133fs,ZNF717:NM_001290209:exon5:c.247delA:p.T83fs
chr3	75788382	C	T	het	1	0.0434783	exonic	ZNF717	nonsynonymous SNV	ZNF717:NM_001128223:exon5:c.392G>A:p.G131E,ZNF717:NM_001290208:exon5:c.392G>A:p.G131E,ZNF717:NM_001290209:exon5:c.242G>A:p.G81E										0.17	0.003	0.006	0.93	-3.99			1	2.09	0	0.087		3.89	-1.521	-0.282	0.303	1.709	11.67
chr3	75788390	A	C	het	3	0.130435	exonic	ZNF717	synonymous SNV	ZNF717:NM_001128223:exon5:c.384T>G:p.V128V,ZNF717:NM_001290208:exon5:c.384T>G:p.V128V,ZNF717:NM_001290209:exon5:c.234T>G:p.V78V
chr3	75788394	C	G	het	3	0.130435	exonic	ZNF717	nonsynonymous SNV	ZNF717:NM_001128223:exon5:c.380G>C:p.R127T,ZNF717:NM_001290208:exon5:c.380G>C:p.R127T,ZNF717:NM_001290209:exon5:c.230G>C:p.R77T									rs201974353	0.61	0.753	0.433	3.45	1.23			1	1.665	0	0.019		6.939	0.482	0.737	0.455	-0.419	2.048
chr3	75788403	-	T	het	5	0.217391	exonic	ZNF717	frameshift insertion	ZNF717:NM_001128223:exon5:c.370dupA:p.T124fs,ZNF717:NM_001290208:exon5:c.370dupA:p.T124fs,ZNF717:NM_001290209:exon5:c.220dupA:p.T74fs
chr3	75788411	G	C	het	10	0.434783	exonic	ZNF717	nonsynonymous SNV	ZNF717:NM_001128223:exon5:c.363C>G:p.N121K,ZNF717:NM_001290208:exon5:c.363C>G:p.N121K,ZNF717:NM_001290209:exon5:c.213C>G:p.N71K									rs77210663	0.92	0.024	0.008	0.98	-4.26			1	0.345	0	0.042		5.869	-1.403	-0.826	0.237	-2.398	0.003
chr3	75788428	C	T	het	1	0.0434783	exonic	ZNF717	nonsynonymous SNV	ZNF717:NM_001128223:exon5:c.346G>A:p.V116I,ZNF717:NM_001290208:exon5:c.346G>A:p.V116I,ZNF717:NM_001290209:exon5:c.196G>A:p.V66I										0.41	0	0.001	0.87	0.045			1	0.97	0	0.063		4.478	0.008	-0.002	0.35	0.17	4.916
chr3	75788432	T	A	het	7	0.304348	exonic	ZNF717	nonsynonymous SNV	ZNF717:NM_001128223:exon5:c.342A>T:p.Q114H,ZNF717:NM_001290208:exon5:c.342A>T:p.Q114H,ZNF717:NM_001290209:exon5:c.192A>T:p.Q64H									rs74703212	0.08	0.969	0.79	0.86	0.901			1	0.66	0	0.124		6.835	0.264	0.097	0.447	1.378	10.54	ID=COSM149427;OCCURENCE=1(stomach)
chr3	75788434	G	T	het	16	0.695652	exonic	ZNF717	nonsynonymous SNV	ZNF717:NM_001128223:exon5:c.340C>A:p.Q114K,ZNF717:NM_001290208:exon5:c.340C>A:p.Q114K,ZNF717:NM_001290209:exon5:c.190C>A:p.Q64K									rs77608525	0.71	0.588	0.118	0.91	-0.13			1	0.805	0	0.052		8.996	-0.008	-0.013	0.501	-1.711	0.011	ID=COSM149428;OCCURENCE=1(stomach)
chr3	75788447	A	G	het	1	0.0434783	exonic	ZNF717	synonymous SNV	ZNF717:NM_001128223:exon5:c.327T>C:p.D109D,ZNF717:NM_001290208:exon5:c.327T>C:p.D109D,ZNF717:NM_001290209:exon5:c.177T>C:p.D59D
chr3	75788504	G	A	het	2	0.0869565	splicing	ZNF717
chr3	75788513	G	C	het	6	0.26087	splicing	ZNF717											rs78030174
chr3	75790466	G	T	het	10	0.434783	exonic	ZNF717	nonsynonymous SNV	ZNF717:NM_001128223:exon4:c.238C>A:p.P80T,ZNF717:NM_001290208:exon4:c.238C>A:p.P80T,ZNF717:NM_001290209:exon4:c.88C>A:p.P30T,ZNF717:NM_001290210:exon4:c.238C>A:p.P80T									rs78571006	0.12	0.328	0.016	5.37	1.97			1	3.06	0	0.173		5.821	1.127	0.112	0.681	2.887	15.62
chr3	75790472	C	T	het	3	0.130435	exonic	ZNF717	nonsynonymous SNV	ZNF717:NM_001128223:exon4:c.232G>A:p.A78T,ZNF717:NM_001290208:exon4:c.232G>A:p.A78T,ZNF717:NM_001290209:exon4:c.82G>A:p.A28T,ZNF717:NM_001290210:exon4:c.232G>A:p.A78T									rs200497785	0.54	0.991	0.508	5.72	1.97			1	0.15	0	0.057		7.497	1.127	0.299	0.672	3.339	17.24
chr3	75790479	C	T	het	18	0.782609	exonic	ZNF717	synonymous SNV	ZNF717:NM_001128223:exon4:c.225G>A:p.E75E,ZNF717:NM_001290208:exon4:c.225G>A:p.E75E,ZNF717:NM_001290209:exon4:c.75G>A:p.E25E,ZNF717:NM_001290210:exon4:c.225G>A:p.E75E									rs79902868
chr3	75790527	T	C	het	10	0.434783	splicing	ZNF717											rs75965304
chr3	75790536	A	T	het	2	0.0869565	splicing	ZNF717											rs148282009
chr3	75790537	T	G	het	2	0.0869565	splicing	ZNF717											rs200883238
chr3	75790747	C	G	het	15	0.652174	splicing	ZNF717											rs73843031
chr3	75790791	G	C	het	5	0.217391	exonic	ZNF717	nonsynonymous SNV	ZNF717:NM_001128223:exon3:c.154C>G:p.L52V,ZNF717:NM_001290208:exon3:c.154C>G:p.L52V,ZNF717:NM_001290209:exon3:c.4C>G:p.L2V,ZNF717:NM_001290210:exon3:c.154C>G:p.L52V									rs72503552	0.02	0.995	0.782	5.32	1.97			0.992	3.145	0	0.034		5.821	1.127	-0.292	0.62	1.992	12.62
chr3	75790797	C	T	het	4	0.173913	exonic	ZNF717	nonsynonymous SNV	ZNF717:NM_001128223:exon3:c.148G>A:p.V50M,ZNF717:NM_001290208:exon3:c.148G>A:p.V50M,ZNF717:NM_001290210:exon3:c.148G>A:p.V50M									rs147946451	0.01	1	0.929	3.73	1.97			0	3.35	0	0		9.69	1.127	1.184	0.648	2.645	14.8	ID=COSM1723007;OCCURENCE=1(NS)
chr3	75790807	C	G	het	6	0.26087	exonic	ZNF717	synonymous SNV	ZNF717:NM_001128223:exon3:c.138G>C:p.L46L,ZNF717:NM_001290208:exon3:c.138G>C:p.L46L,ZNF717:NM_001290210:exon3:c.138G>C:p.L46L									rs79931754
chr3	75790809	G	A	het	2	0.0869565	exonic	ZNF717	synonymous SNV	ZNF717:NM_001128223:exon3:c.136C>T:p.L46L,ZNF717:NM_001290208:exon3:c.136C>T:p.L46L,ZNF717:NM_001290210:exon3:c.136C>T:p.L46L									rs76585791
chr3	75790811	G	T	het	2	0.0869565	exonic	ZNF717	nonsynonymous SNV	ZNF717:NM_001128223:exon3:c.134C>A:p.T45N,ZNF717:NM_001290208:exon3:c.134C>A:p.T45N,ZNF717:NM_001290210:exon3:c.134C>A:p.T45N									rs76346895	0.55	0.996	0.789	4.75	-0.523			1	0.27	0	0.006		4.71	0.178	-0.33	0.51	1.742	11.78
chr3	75790814	C	T	het	3	0.130435	exonic	ZNF717	nonsynonymous SNV	ZNF717:NM_001128223:exon3:c.131G>A:p.R44K,ZNF717:NM_001290208:exon3:c.131G>A:p.R44K,ZNF717:NM_001290210:exon3:c.131G>A:p.R44K									rs200578600	0.55	0.036	0.025	4.69	-0.08			1	0.445	0	0.004		4.274	-0.176	-0.511	0.555	-1.523	0.016
chr3	75790820	G	A	het	7	0.304348	exonic	ZNF717	nonsynonymous SNV	ZNF717:NM_001128223:exon3:c.125C>T:p.A42V,ZNF717:NM_001290208:exon3:c.125C>T:p.A42V,ZNF717:NM_001290210:exon3:c.125C>T:p.A42V									rs74778923	0.24	0.001	0.001	4.27	1.03			1	2.315	0	0.011		2.499	0.182	-0.469	0.589	0.825	8.322
chr3	75790822	A	G	het	12	0.521739	exonic	ZNF717	synonymous SNV	ZNF717:NM_001128223:exon3:c.123T>C:p.D41D,ZNF717:NM_001290208:exon3:c.123T>C:p.D41D,ZNF717:NM_001290210:exon3:c.123T>C:p.D41D									rs2918520
chr3	75790832	T	C	het	1	0.0434783	exonic	ZNF717	nonsynonymous SNV	ZNF717:NM_001128223:exon3:c.113A>G:p.D38G,ZNF717:NM_001290208:exon3:c.113A>G:p.D38G,ZNF717:NM_001290210:exon3:c.113A>G:p.D38G									rs199668643	0.33	0.986	0.619	4.64	1.27			1	0.51	0	0.006		6.417	0.577	0.204	0.642	2.086	12.93	ID=COSM1425341;OCCURENCE=4(large_intestine)
chr3	75790837	C	A	het	10	0.434783	exonic	ZNF717	nonsynonymous SNV	ZNF717:NM_001128223:exon3:c.108G>T:p.W36C,ZNF717:NM_001290208:exon3:c.108G>T:p.W36C,ZNF717:NM_001290210:exon3:c.108G>T:p.W36C									rs75811170	0	0.999	0.988	2.89	1.27			1	3.54	0	0.103		8.169	0.69	3.256	0.666	2.555	14.5		CLINSIG=untested;CLNDBN=Malignant_melanoma;CLNREVSTAT=not;CLNACC=RCV000066188.2;CLNDSDB=MedGen:SNOMED_CT;CLNDSDBID=C0025202:2092003
chr3	75790838	C	T	het	3	0.130435	exonic	ZNF717	stopgain	ZNF717:NM_001128223:exon3:c.107G>A:p.W36X,ZNF717:NM_001290208:exon3:c.107G>A:p.W36X,ZNF717:NM_001290210:exon3:c.107G>A:p.W36X									rs113991634	1	0	0	0	1.27			0	0	0	0	4.67527	8.169	0.69	1.125	0	4.675	25.8
chr3	75790852	G	A	het	6	0.26087	exonic	ZNF717	synonymous SNV	ZNF717:NM_001128223:exon3:c.93C>T:p.F31F,ZNF717:NM_001290208:exon3:c.93C>T:p.F31F,ZNF717:NM_001290210:exon3:c.93C>T:p.F31F									rs201689840
chr3	75790860	C	G	het	7	0.304348	exonic	ZNF717	nonsynonymous SNV	ZNF717:NM_001128223:exon3:c.85G>C:p.V29L,ZNF717:NM_001290208:exon3:c.85G>C:p.V29L,ZNF717:NM_001290210:exon3:c.85G>C:p.V29L										0.04	0.978	0.918	3.69	1.14			1	3.075	0	0.05		7.888	0.607	-0.124	0.6	2.864	15.54	ID=COSM1618066;OCCURENCE=1(liver)
chr3	75790864	T	C	het	7	0.304348	exonic	ZNF717	synonymous SNV	ZNF717:NM_001128223:exon3:c.81A>G:p.V27V,ZNF717:NM_001290208:exon3:c.81A>G:p.V27V,ZNF717:NM_001290210:exon3:c.81A>G:p.V27V									rs75271400
chr3	75790867	C	A	het	6	0.26087	exonic	ZNF717	nonsynonymous SNV	ZNF717:NM_001128223:exon3:c.78G>T:p.E26D,ZNF717:NM_001290208:exon3:c.78G>T:p.E26D,ZNF717:NM_001290210:exon3:c.78G>T:p.E26D									rs77644642	1	0.001	0.001	6.61	-2.29			1	-3.19	0	0		5.049	-0.705	-1.654	0.611	-1.702	0.011
chr3	75790920	G	C	het	2	0.0869565	intronic	ZNF717											rs75752644	0.14	0	0	3.43	0.647			1	0	0	0.015		3.808	0.666	-0.224	0.344	0.84	8.391
chr3	108475993	-	GGGGGATTA	het	1	0.0434783	exonic	RETNLB	stopgain	RETNLB:NM_032579:exon1:c.39_40insTAATCCCCC:p.L14delinsX
chr3	108476954	G	-	het	1	0.0434783	upstream	RETNLB
chr3	129740684	T	C	het	1	0.0434783	intergenic	TRH,ALG1L2			0.0008	0.0014
chr3	129753701	G	A	het	1	0.0434783	intergenic	TRH,ALG1L2
chr3	129753703	G	A	het	1	0.0434783	intergenic	TRH,ALG1L2
chr3	129753716	T	A	het	1	0.0434783	intergenic	TRH,ALG1L2
chr3	129800688	C	A	het	16	0.695652	UTR5	ALG1L2											rs67070157
chr3	129800783	A	T	het	13	0.565217	UTR5	ALG1L2											rs72988371
chr3	129800823	T	G	het	14	0.608696	UTR5	ALG1L2											rs78610497
chr3	129800887	-	A	het	1	0.0434783	splicing	ALG1L2
chr3	129800888	G	A	het	11	0.478261	splicing	ALG1L2											rs76920544
chr3	129800895	G	A	het	11	0.478261	splicing	ALG1L2											rs79888841
chr3	129807921	A	G	het	2	0.0869565	intronic	ALG1L2											rs181860576
chr3	129808330	T	G	het	1	0.0434783	intronic	ALG1L2											rs373486705
chr3	129808339	G	A	het	2	0.0869565	intronic	ALG1L2											rs116332365
chr3	129808340	-	A	het	1	0.0434783	intronic	ALG1L2
chr3	129810925	-	T	het	1	0.0434783	splicing	ALG1L2
chr3	129810983	-	G	het	1	0.0434783	exonic	ALG1L2	frameshift insertion	ALG1L2:NM_001136152:exon3:c.171_172insG:p.F57fs
chr3	129811244	C	A	het	1	0.0434783	intronic	ALG1L2
chr3	129815251	-	A	het	1	0.0434783	intronic	ALG1L2
chr3	130098434	A	C	het	1	0.0434783	exonic	COL6A5	nonsynonymous SNV	COL6A5:NM_001278298:exon4:c.841A>C:p.N281H,COL6A5:NM_153264:exon4:c.841A>C:p.N281H										0.35	0.348	0.473	-1.15	-5.21			1	1.78	0	0.428		16	-0.803	-0.506	0.092	0.391	6.125
chr3	130098639	C	T	het	3	0.130435	exonic	COL6A5	nonsynonymous SNV	COL6A5:NM_001278298:exon4:c.1046C>T:p.P349L,COL6A5:NM_153264:exon4:c.1046C>T:p.P349L				0.001		0.0092			rs142949552	0.29	0.696	0.283	-1.69	5.34			1	1.79	0	0.458		12.876	2.503	1.076	0.173	2.298	13.64
chr3	130104218	-	A	het	1	0.0434783	splicing	COL6A5
chr3	130107632	-	AT	het	1	0.0434783	exonic	COL6A5	frameshift insertion	COL6A5:NM_001278298:exon6:c.2071_2072insAT:p.I691fs,COL6A5:NM_153264:exon6:c.2071_2072insAT:p.I691fs
chr3	130107695	A	T	het	1	0.0434783	exonic	COL6A5	nonsynonymous SNV	COL6A5:NM_001278298:exon6:c.2134A>T:p.N712Y,COL6A5:NM_153264:exon6:c.2134A>T:p.N712Y										0.04	0.674	0.395	-1.79	0.424			1	1.7	0	0.438		5.978	0.078	0.56	0.165	-0.222	2.929
chr3	130107827	G	A	het	1	0.0434783	exonic	COL6A5	nonsynonymous SNV	COL6A5:NM_001278298:exon6:c.2266G>A:p.V756M,COL6A5:NM_153264:exon6:c.2266G>A:p.V756M						0.002		0.000629	rs377358492	0	1	0.995	-2.16	3.67			0.955	2.995	0	0.792		9.589	1.305	2.061	0.483	2.114	13.03
chr3	130110537	-	A	het	1	0.0434783	exonic	COL6A5	frameshift insertion	COL6A5:NM_001278298:exon7:c.2933dupA:p.D978fs,COL6A5:NM_153264:exon7:c.2933dupA:p.D978fs
chr3	130124873	T	-	het	1	0.0434783	splicing	COL6A5
chr3	130190787	T	C	het	1	0.0434783	splicing	COL6A5			0.0038	0.0014							rs180757189
chr4	100946175	-	T	het	1	0.0434783	ncRNA_intronic	LOC256880
chr4	100958718	AT	CG	het	1	0.0434783	ncRNA_exonic	LOC256880
chr4	100958719	T	G	het	1	0.0434783	ncRNA_exonic	LOC256880
chr4	100963161	T	-	het	1	0.0434783	intergenic	LOC256880,DDIT4L
chr4	101108882	-	T	het	1	0.0434783	exonic	DDIT4L	frameshift insertion	DDIT4L:NM_145244:exon3:c.533dupA:p.K178fs
chr4	152197914	C	A	het	1	0.0434783	upstream	PRSS48
chr4	152198240	T	C	het	1	0.0434783	upstream	PRSS48				0.0014
chr4	152213463	A	-	het	1	0.0434783	downstream	PRSS48
chr4	152213465	G	A	het	1	0.0434783	downstream	PRSS48
chr4	152213529	-	T	het	1	0.0434783	downstream	PRSS48
chr4	155155852	-	G	het	1	0.0434783	exonic	DCHS2	frameshift insertion	DCHS2:NM_017639:exon25:c.8586_8587insC:p.G2863fs
chr4	155156384	G	A	het	1	0.0434783	exonic	DCHS2	synonymous SNV	DCHS2:NM_017639:exon25:c.8055C>T:p.D2685D									rs200455137																			ID=COSM272569;OCCURENCE=1(large_intestine)
chr4	155180911	-	T	het	1	0.0434783	splicing	DCHS2
chr4	155219316	-	T	het	1	0.0434783	exonic	DCHS2	frameshift insertion	DCHS2:NM_017639:exon18:c.4784dupA:p.E1595fs
chr4	155226401	-	A	het	1	0.0434783	splicing	DCHS2
chr4	155243603	AT	GC	het	1	0.0434783	exonic	DCHS2	nonframeshift substitution	DCHS2:NM_017639:exon13:c.2690_2691GC
chr4	155252886	C	T	het	1	0.0434783	splicing	DCHS2
chr4	155312351	C	T	hom	1	0.0434783	exonic	DCHS2	synonymous SNV	DCHS2:NM_017639:exon1:c.99G>A:p.V33V	0.0015	0.0029		0.001			0.000227	0.002559	rs149172519
chr4	155413215	A	-	het	1	0.0434783	upstream	DCHS2
chr4	177117477	G	T	het	1	0.0434783	upstream	SPATA4
chr4	177117478	T	-	het	1	0.0434783	upstream	SPATA4
chr5	121464597	T	G	hom	13	0.565217	upstream	ZNF474											rs2560312
chr5	140528909	-	A	het	1	0.0434783	upstream	PCDHB6
chr5	140529131	-	T	het	1	0.0434783	upstream	PCDHB6
chr5	140529437	C	A	het	1	0.0434783	upstream	PCDHB6
chr5	140530782	T	A	het	1	0.0434783	exonic	PCDHB6	nonsynonymous SNV	PCDHB6:NM_018939:exon1:c.944T>A:p.V315E,PCDHB6:NM_001303145:exon2:c.536T>A:p.V179E										0	0.994	0.974	0.53	4.85			1	2.905	0	0.389		14.73	1.938	5.939	0.829	2.628	14.75			606332
chr5	140532487	CAA	-	het	1	0.0434783	UTR3	PCDHB6
chr5	140532488	AA	-	het	1	0.0434783	UTR3	PCDHB6
chr5	140532489	A	-	het	1	0.0434783	UTR3	PCDHB6
chr5	140532573	-	A	het	1	0.0434783	UTR3	PCDHB6
chr5	140532663	G	A	het	1	0.0434783	UTR3	PCDHB6				0.0043		0.002					rs193256412
chr5	140532804	C	T	het	1	0.0434783	UTR3	PCDHB6
chr5	140532806	T	C	het	1	0.0434783	UTR3	PCDHB6
chr5	140532811	TA	-	het	1	0.0434783	UTR3	PCDHB6
chr5	140532851	T	-	het	1	0.0434783	UTR3	PCDHB6
chr5	140533085	-	T	het	1	0.0434783	downstream	PCDHB6
chr5	140773292	-	A	het	1	0.0434783	exonic	PCDHGA8	frameshift insertion	PCDHGA8:NM_014004:exon1:c.912dupA:p.A304fs,PCDHGA8:NM_032088:exon1:c.912dupA:p.A304fs
chr5	140773871	G	-	het	1	0.0434783	exonic	PCDHGA8	frameshift deletion	PCDHGA8:NM_014004:exon1:c.1491delG:p.Q497fs,PCDHGA8:NM_032088:exon1:c.1491delG:p.Q497fs
chr5	140807926	-	T	het	1	0.0434783	intronic	PCDHGA1,PCDHGA10,PCDHGA11,PCDHGA2,PCDHGA3,PCDHGA4,PCDHGA5,PCDHGA6,PCDHGA7,PCDHGA8,PCDHGA9,PCDHGB1,PCDHGB2,PCDHGB3,PCDHGB4,PCDHGB5,PCDHGB6,PCDHGB7
chr5	140808145	-	T	het	1	0.0434783	intronic	PCDHGA1,PCDHGA10,PCDHGA11,PCDHGA2,PCDHGA3,PCDHGA4,PCDHGA5,PCDHGA6,PCDHGA7,PCDHGA8,PCDHGA9,PCDHGB1,PCDHGB2,PCDHGB3,PCDHGB4,PCDHGB5,PCDHGB6,PCDHGB7
chr5	140890920	A	G	het	1	0.0434783	UTR3	PCDHGA1,PCDHGA10,PCDHGA11,PCDHGA12,PCDHGA2,PCDHGA3,PCDHGA4,PCDHGA5,PCDHGA6,PCDHGA7,PCDHGA8,PCDHGA9,PCDHGB1,PCDHGB2,PCDHGB3,PCDHGB4,PCDHGB5,PCDHGB6,PCDHGB7,PCDHGC3,PCDHGC4,PCDHGC5
chr5	140890925	G	-	het	1	0.0434783	UTR3	PCDHGA1,PCDHGA10,PCDHGA11,PCDHGA12,PCDHGA2,PCDHGA3,PCDHGA4,PCDHGA5,PCDHGA6,PCDHGA7,PCDHGA8,PCDHGA9,PCDHGB1,PCDHGB2,PCDHGB3,PCDHGB4,PCDHGB5,PCDHGB6,PCDHGB7,PCDHGC3,PCDHGC4,PCDHGC5
chr5	140890927	T	C	het	1	0.0434783	UTR3	PCDHGA1,PCDHGA10,PCDHGA11,PCDHGA12,PCDHGA2,PCDHGA3,PCDHGA4,PCDHGA5,PCDHGA6,PCDHGA7,PCDHGA8,PCDHGA9,PCDHGB1,PCDHGB2,PCDHGB3,PCDHGB4,PCDHGB5,PCDHGB6,PCDHGB7,PCDHGC3,PCDHGC4,PCDHGC5
chr5	140890931	T	C	het	3	0.130435	UTR3	PCDHGA1,PCDHGA10,PCDHGA11,PCDHGA12,PCDHGA2,PCDHGA3,PCDHGA4,PCDHGA5,PCDHGA6,PCDHGA7,PCDHGA8,PCDHGA9,PCDHGB1,PCDHGB2,PCDHGB3,PCDHGB4,PCDHGB5,PCDHGB6,PCDHGB7,PCDHGC3,PCDHGC4,PCDHGC5			0.0053								rs115159796
chr5	149372772	-	T	het	1	0.0434783	UTR3	TIGD6
chr5	149375524	G	A	hom	1	0.0434783	exonic	TIGD6	nonsynonymous SNV	TIGD6:NM_001243253:exon2:c.388C>T:p.R130C,TIGD6:NM_030953:exon2:c.388C>T:p.R130C								0.000116	rs183209398	0	1	0.992	1.47	-0.456			1	3.305	0.267	0.181		1.217	-0.197	0.212	0.402	1.396	10.6
chr5	156715617	-	T	het	1	0.0434783	intronic	CYFIP2
chr5	156727917	-	C	het	1	0.0434783	splicing	CYFIP2
chr5	156727919	C	T	het	1	0.0434783	splicing	CYFIP2
chr5	156731327	G	-	het	1	0.0434783	exonic	CYFIP2	frameshift deletion	CYFIP2:NM_001291721:exon7:c.670delG:p.E224fs,CYFIP2:NM_001037333:exon8:c.748delG:p.E250fs,CYFIP2:NM_001291722:exon8:c.748delG:p.E250fs,CYFIP2:NM_014376:exon8:c.748delG:p.E250fs
chr5	156790410	T	-	het	1	0.0434783	intronic	CYFIP2
chr5	156790937	C	-	het	1	0.0434783	intronic	CYFIP2
chr5	156791975	-	A	het	1	0.0434783	intronic	CYFIP2
chr5	156803126	C	T	het	1	0.0434783	intronic	CYFIP2											rs200126916
chr5	156807072	T	-	het	1	0.0434783	intronic	CYFIP2
chr5	156811284	-	A	het	1	0.0434783	intronic	CYFIP2
chr5	159992697	C	-	het	1	0.0434783	exonic	ATP10B	frameshift deletion	ATP10B:NM_025153:exon26:c.4149delG:p.K1383fs
chr5	160016587	T	A	het	1	0.0434783	splicing	ATP10B
chr5	160018116	T	C	het	1	0.0434783	exonic	ATP10B	nonsynonymous SNV	ATP10B:NM_025153:exon23:c.3595A>G:p.M1199V								0.000121	rs368605726	0	0	0.001	-0.72	2.45			0.994	1.11	0.001	0.191		8.531	0.313	2.787	0.163	0.637	7.421
chr5	180581604	A	G	het	1	0.0434783	upstream	OR2V2
chr5	180581606	G	-	het	1	0.0434783	upstream	OR2V2
chr5	180583059	T	A	het	5	0.217391	downstream	OR2V2											rs113583315
chr5	180583063	T	G	het	1	0.0434783	downstream	OR2V2
chr5	180583067	T	G	het	1	0.0434783	downstream	OR2V2
chr5	180583079	T	G	het	6	0.26087	downstream	OR2V2											rs6876056
chr5	180583095	T	G	het	1	0.0434783	downstream	OR2V2
chr6	11093795	C	A	het	1	0.0434783	upstream	SMIM13
chr6	11135797	-	A	het	1	0.0434783	UTR3	SMIM13
chr6	79692681	C	T	het	1	0.0434783	exonic	PHIP	synonymous SNV	PHIP:NM_017934:exon23:c.2691G>A:p.K897K
chr6	79711726	A	-	het	1	0.0434783	exonic	PHIP	frameshift deletion	PHIP:NM_017934:exon17:c.1769delT:p.L590fs
chr6	79788271	G	T	het	1	0.0434783	upstream	PHIP
chr6	153018546	G	-	het	1	0.0434783	upstream	MYCT1
chr6	153026934	-	A	hom	1	0.0434783	intronic	MYCT1
chr6	153027195	AA	-	hom	1	0.0434783	intronic	MYCT1
chr6	153027196	A	-	hom	1	0.0434783	intronic	MYCT1
chr7	56079574	-	A	het	1	0.0434783	splicing	PSPH
chr7	56087374	C	T	het	1	0.0434783	exonic	PSPH	nonsynonymous SNV	PSPH:NM_004577:exon5:c.194G>A:p.R65H									rs200442078	0	0.999	0.981	-1.96	4.61			1	4.395	0	0.858		16.599	2.395	7.233	0.832	3.809	19.34			172480
chr7	56087379	T	C	het	1	0.0434783	exonic	PSPH	synonymous SNV	PSPH:NM_004577:exon5:c.189A>G:p.T63T									rs201935398																			ID=COSM1623000;OCCURENCE=1(liver)
chr7	56087399	G	A	het	1	0.0434783	exonic	PSPH	nonsynonymous SNV	PSPH:NM_004577:exon5:c.169C>T:p.P57S									rs79321413	0.29	0.001	0.003	-1.55	3.54			0.775	-0.78	0	0.206		9.635	2.337	3.219	0.132	0.307	5.665			172480
chr7	56088786	A	T	het	1	0.0434783	exonic	PSPH	synonymous SNV	PSPH:NM_004577:exon4:c.120T>A:p.V40V									rs202027697
chr7	56088789	G	A	het	1	0.0434783	exonic	PSPH	synonymous SNV	PSPH:NM_004577:exon4:c.117C>T:p.G39G									rs199851385
chr7	56088825	T	A	het	1	0.0434783	exonic	PSPH	nonsynonymous SNV	PSPH:NM_004577:exon4:c.81A>T:p.R27S									rs74445297	0.32	0.001	0.01	-1.58	0.722			1	1.52	0	0		8.716	0.108	0.542	0.696	0.777	8.101			172480
chr7	56088902	C	T	het	3	0.130435	exonic	PSPH	nonsynonymous SNV	PSPH:NM_004577:exon4:c.4G>A:p.V2I									rs77329757	0.33	0.004	0.004	-1.11	4.62			0.982	1.355	0.06	0.401		13.309	1.325	1.602	0.243	1.87	12.21	ID=COSM1568914;OCCURENCE=1(large_intestine)		172480
chr7	56088928	C	T	het	4	0.173913	splicing	PSPH											rs200942360
chr7	56146715	A	G	het	3	0.130435	intronic	SUMF2						0.005		0.0031			rs186963977	0.67	0	0	-3.06	0.263			1	0	0	0.355		3.479	0.055	-0.94	0.106	0.958	8.909			607940
chr7	56243524	C	A	het	1	0.0434783	intergenic	NUPR1L,LOC650226						0.003					rs117337063
chr7	56243973	T	G	het	2	0.0869565	intergenic	NUPR1L,LOC650226
chr7	56244002	C	-	het	1	0.0434783	intergenic	NUPR1L,LOC650226
chr7	56356612	C	A	het	1	0.0434783	intergenic	NUPR1L,LOC650226
chr7	56357065	A	-	het	1	0.0434783	intergenic	NUPR1L,LOC650226
chr7	56358551	T	-	het	1	0.0434783	intergenic	NUPR1L,LOC650226
chr7	56373036	A	C	het	1	0.0434783	intergenic	NUPR1L,LOC650226
chr7	56431161	G	-	het	1	0.0434783	intergenic	NUPR1L,LOC650226
chr7	56432351	C	T	het	2	0.0869565	intergenic	NUPR1L,LOC650226
chr7	56432839	T	C	het	1	0.0434783	intergenic	NUPR1L,LOC650226						0.003
chr7	56432914	C	T	het	1	0.0434783	intergenic	NUPR1L,LOC650226
chr7	56432923	C	T	het	1	0.0434783	intergenic	NUPR1L,LOC650226
chr7	75701898	-	G	het	1	0.0434783	intergenic	MDH2,SRRM3
chr7	75701987	T	G	het	1	0.0434783	intergenic	MDH2,SRRM3
chr7	75703273	G	A	het	2	0.0869565	intergenic	MDH2,SRRM3
chr7	75704157	C	-	het	1	0.0434783	intergenic	MDH2,SRRM3
chr7	75716765	C	T	het	1	0.0434783	intergenic	MDH2,SRRM3											rs79315021
chr7	75716781	G	T	het	1	0.0434783	intergenic	MDH2,SRRM3
chr7	75716789	C	A	het	1	0.0434783	intergenic	MDH2,SRRM3											rs77983993
chr7	75720330	C	T	het	1	0.0434783	intergenic	MDH2,SRRM3
chr7	75720588	T	G	het	1	0.0434783	intergenic	MDH2,SRRM3
chr7	75738008	-	T	het	1	0.0434783	intergenic	MDH2,SRRM3
chr7	149474394	A	G	het	1	0.0434783	exonic	SSPO	synonymous SNV	SSPO:NM_198455:exon4:c.438A>G:p.Q146Q
chr7	149476620	C	T	het	3	0.130435	splicing	SSPO
chr7	149482201	-	C	het	1	0.0434783	splicing	SSPO
chr7	149484005	A	G	het	1	0.0434783	intronic	SSPO			0.0008
chr7	149484049	T	A	het	1	0.0434783	intronic	SSPO
chr7	149484072	C	T	het	2	0.0869565	intronic	SSPO						0.002		0.001
chr7	149488927	G	C	het	3	0.130435	exonic	SSPO	nonsynonymous SNV	SSPO:NM_198455:exon35:c.5268G>C:p.W1756C				0.001		0.001		0.00012	rs376948480
chr7	149494465	-	T	het	1	0.0434783	intronic	SSPO
chr7	149495385	C	G	het	1	0.0434783	intronic	SSPO
chr7	149495533	C	-	het	1	0.0434783	intronic	SSPO
chr7	149495880	G	A	het	1	0.0434783	intronic	SSPO
chr7	149499055	C	T	het	1	0.0434783	splicing	SSPO
chr7	149509407	G	T	het	1	0.0434783	exonic	SSPO	nonsynonymous SNV	SSPO:NM_198455:exon69:c.9805G>T:p.G3269W
chr7	149516416	C	T	het	1	0.0434783	exonic	SSPO	nonsynonymous SNV	SSPO:NM_198455:exon84:c.11819C>T:p.P3940L
chr7	149520812	G	-	het	1	0.0434783	splicing	SSPO
chr7	149531008	C	-	het	1	0.0434783	UTR3	SSPO
chr8	38827947	-	T	het	1	0.0434783	UTR3	PLEKHA2
chr8	38830049	AA	GG	het	2	0.0869565	UTR3	PLEKHA2
chr8	38830454	-	T	het	1	0.0434783	UTR3	PLEKHA2
chr8	38831401	T	-	het	1	0.0434783	UTR3	PLEKHA2
chr8	145737183	A	G	het	1	0.0434783	splicing	RECQL4			0.0053						0.004817		rs370677156
chr8	145739817	G	A	het	1	0.0434783	splicing	RECQL4			0.0053	0.0043		0.003			0.003837	0.001906	rs35876881
chr9	86237313	G	A	het	2	0.0869565	upstream	IDNK
chr9	86243146	G	A	het	1	0.0434783	splicing	IDNK
chr9	86256453	T	-	het	1	0.0434783	splicing	IDNK
chr9	107365981	-	T	het	1	0.0434783	downstream	OR13C2
chr9	107366290	-	TACGC	het	1	0.0434783	downstream	OR13C2											rs146693031
chr9	107366293	G	A	het	2	0.0869565	downstream	OR13C2											rs79466156
chr9	107367600	G	A	het	1	0.0434783	exonic	OR13C2	synonymous SNV	OR13C2:NM_001004481:exon1:c.309C>T:p.L103L								0.000233	rs75303300
chr9	107368217	C	G	het	1	0.0434783	upstream	OR13C2
chr9	107368849	-	A	het	1	0.0434783	upstream	OR13C2
chrX	19988936	C	T	het	1	0.0434783	upstream	CXorf23						0.0065		0.0028			rs141510254
chrX	53406301	G	C	hom	1	0.0434783	UTR3	SMC1A
chrX	53407534	-	C	het	1	0.0434783	splicing	SMC1A
chrX	100748192	C	G	het	1	0.0434783	exonic	ARMCX4	nonsynonymous SNV	ARMCX4:NM_001256155:exon2:c.4616C>G:p.T1539R										0	0	0	0	-6.44			1	0	0	0.038		1.72	-1.144	-2.198	0.107	-0.711	0.938
chrX	100753158	-	A	het	1	0.0434783	intergenic	ARMCX4,ARMCX1
chrX	101395780	T	G	het	1	0.0434783	exonic	TCEAL6	nonsynonymous SNV	TCEAL6:NM_001006938:exon3:c.524A>C:p.Q175P									rs111588852	0.13	0.001	0.001	1.91	-5.64			1	0.975	0.001	0.032		6.429	-2.052	-2.544	0.068	0.07	4.378
chrX	122251599	C	T	het	1	0.0434783	intergenic	MIR3672,GRIA3			0.004								rs199712791	0.01	0	0	0	0.212			1	0	0.001	0.091		3	0.646	-0.251	0.246	2.448	14.14
chrX	122551242	T	C	het	1	0.0434783	splicing	GRIA3
chrX	135889854	A	G	het	1	0.0434783	intergenic	ARHGEF6,RBMX			0.002	0.0038		0.0026		0.0014			rs189094695
chrX	135956342	C	G	het	8	0.347826	exonic	RBMX	nonsynonymous SNV	RBMX:NM_002139:exon9:c.1135G>C:p.G379R									rs72615484	0.29	1	0.996	-1.4	5.54			1	1.895	0	0.638		18.509	2.313	7.692	0.771	2.098	12.97			300199
chrX	135956370	G	A	het	8	0.347826	exonic	RBMX	synonymous SNV	RBMX:NM_002139:exon9:c.1107C>T:p.R369R									rs74509382
chrX	135956408	A	G	het	8	0.347826	exonic	RBMX	nonsynonymous SNV	RBMX:NM_002139:exon9:c.1069T>C:p.Y357H									rs76876438	0.08	0.995	0.969	-1.1	5.66			0	1.7	0	0.557		14.898	1.9	9.184	0.735	1.938	12.44			300199
chrX	135956432	-	C	het	1	0.0434783	exonic	RBMX	frameshift insertion	RBMX:NM_002139:exon9:c.1044dupG:p.L349fs
chrX	135956462	G	C	het	8	0.347826	exonic	RBMX	nonsynonymous SNV	RBMX:NM_002139:exon9:c.1015C>G:p.R339G									rs74463481	0.01	0.889	0.319	-1.47	4.54			0	1.845	0	0.412		13.84	1.168	4.693	0.865	1.824	12.06	ID=COSM1636400;OCCURENCE=1(liver)		300199
chrX	135956467	C	T	het	7	0.304348	exonic	RBMX	nonsynonymous SNV	RBMX:NM_002139:exon9:c.1010G>A:p.S337N									rs35899675	0.13	0.981	0.954	-1.08	5.4			0	1.355	0	0.537		18.431	2.38	4.933	0.085	2.524	14.4	ID=COSM292203;OCCURENCE=1(liver),1(large_intestine)		300199
chrX	135956506	C	G	het	6	0.26087	exonic	RBMX	nonsynonymous SNV	RBMX:NM_002139:exon9:c.971G>C:p.R324P									rs77794331	0.06	0.996	0.969	-1.18	5.4			1	1.845	0	0.586		18.431	2.38	7.717	0.86	3.288	17.04			300199
chrX	135956575	G	A	het	1	0.0434783	exonic	RBMX	nonsynonymous SNV	RBMX:NM_002139:exon9:c.902C>T:p.P301L									rs78646793	0.05	0.269	0.026	-1.13	5.4			1	1.895	0	0.389		18.431	2.38	7.751	0.512	2.229	13.41	ID=COSM1180606;OCCURENCE=1(upper_aerodigestive_tract)		300199
chrX	135956586	T	C	het	1	0.0434783	exonic	RBMX	synonymous SNV	RBMX:NM_002139:exon9:c.891A>G:p.T297T									rs35260830
chrX	135958726	-	C	het	1	0.0434783	exonic	RBMX	frameshift insertion	RBMX:NM_002139:exon5:c.476dupG:p.G159fs
